# Supplementary material for: Rhodium-catalyzed aminoacylation of alkenes via carbonylative C–H activation toward poly(hetero)cyclic alkylarylketones
Source: Royal Society of Chemistry journal article supplement (doi:10.1039/d2qo01777f), 2022-12-21

## Rhodium-catalyzed aminoacylation of alkenes *via* carbonylative C–H activation toward poly(hetero)cyclic alkylarylketones

Chao Yang,<sup>‡ac</sup> Lijun Shi,<sup>‡b</sup> Wenlong Wang,<sup>\*a</sup> Ji-Bao Xia<sup>\*b</sup> and Fuwei Li<sup>\*b</sup>

<sup>a</sup> School of Materials Science and Engineering, Dongguan University of Technology, Dongguan 523808, China. E-mail: [wangwl@dgut.edu.cn](mailto:wangwl@dgut.edu.cn)

<sup>b</sup> State Key Laboratory for Oxo Synthesis and Selective Oxidation, Lanzhou Institute of Chemical Physics, Chinese Academy of Sciences, Lanzhou 730000, China. E-mail: [jibaomia@licp.cas.cn](mailto:jibaomia@licp.cas.cn); [fuweili@licp.cas.cn](mailto:fuweili@licp.cas.cn)

<sup>c</sup> Department of Chemistry, University of Science and Technology of China, Hefei 230026, China.

<sup>‡</sup> These authors contributed equally to this work.

|                                                                                                                     |            |
|---------------------------------------------------------------------------------------------------------------------|------------|
| <b>1. General information</b>                                                                                       | <b>S2</b>  |
| <b>2. Screening of the reaction conditions</b>                                                                      | <b>S3</b>  |
| <b>3. General procedure for the rhodium-catalyzed carbonylative assembly of poly(hetero)cyclic alkylarylketones</b> | <b>S4</b>  |
| <b>4. Mechanistic studies</b>                                                                                       | <b>S5</b>  |
| <b>5. Synthetic utility of the product</b>                                                                          | <b>S7</b>  |
| <b>6. Experimental characterization data for products</b>                                                           | <b>S9</b>  |
| <b>7. X-Ray crystal structures of product 2g</b>                                                                    | <b>S17</b> |
| <b>8. References</b>                                                                                                | <b>S18</b> |
| <b>9. Copies of NMR spectra</b>                                                                                     | <b>S19</b> |

## 1. General information

Unless otherwise noted, all the reactions were carried out in standard Schlenk technique, and all reagents were used as supplied commercially without further purification from Aldrich, Alfa Aesar, Adamas-beta® or Bidepharm. An oil bath or aluminum heating module equipped with a magnetic stir bar was used for reactions requiring heating.  $^1\text{H}$  NMR,  $^{19}\text{F}$  NMR and  $^{13}\text{C}$  NMR spectra were recorded at 25 °C on a Varian Inova or Bruker Advance 400 M NMR spectrometers ( $\text{CDCl}_3$  as solvent). Chemical shifts of  $^1\text{H}$ ,  $^{19}\text{F}$  and  $^{13}\text{C}$  NMR spectra are reported as  $\delta$  in units of parts per million (ppm) downfield from  $\text{SiMe}_4$  ( $\delta$  0.00) and relative to the signal of  $\text{SiMe}_4$  ( $\delta$  0.00 singlet). Multiplicities were given as: s (singlet); d (doublet); t (triplet); q (quartet); p (pentet); m (multiplet); br (broad), *etc.* Coupling constants are reported as a  $J$  value in Hertz (Hz). The residual solvent signals were used as references and the chemical shifts were converted to the TMS scale ( $\text{CDCl}_3$ :  $\delta$  H = 7.26 ppm,  $\delta$  C = 77.16 ppm). High resolution mass spectral analysis (HRMS) was performed on Agilent 6530 Accurate-Mass Q-TOF with ESI mode. Flash chromatography was performed using 200-300 mesh silica gel with the indicated eluent system. High performance liquid chromatography (HPLC) yields were recorded on the Agilent 1260A instrument and Agilent ZORBAX SB-C18 column, with a mixture of  $\text{H}_2\text{O}$  and acetonitrile as fluent. Single crystal X-ray diffraction data were collected on the Rigaku Oxford Diffraction (ROD) SuperNova Diffraction System.



### 3. General procedure for the rhodium-catalyzed carbonylative assembly of poly(hetero)cyclic alkylarylketones

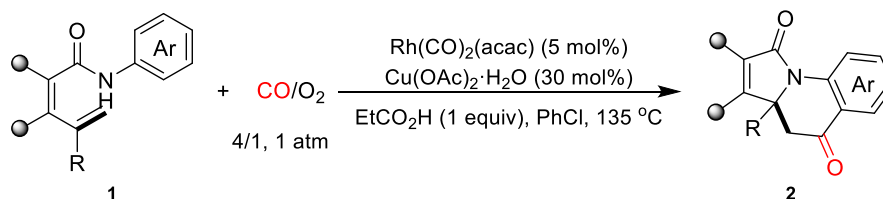

To an oven-dried 50 mL Schlenk tube with a magnetic stir bar, **1** (0.3 mmol),  $\text{Rh}(\text{CO})_2(\text{acac})$  (3.9 mg, 5 mol%),  $\text{Cu}(\text{OAc})_2 \cdot \text{H}_2\text{O}$  (18 mg, 30 mol%), propionic acid (23  $\mu\text{L}$ , 1 equiv) and  $\text{PhCl}$  (1 mL) were added under air atmosphere. Then the tube was purged with  $\text{CO}/\text{O}_2$  (4/1, v/v) for 5 times and the mixture was stirred at  $135\text{ }^\circ\text{C}$  for 20 h. After cooling to room temperature, the reaction mixture was directly loaded onto a silica gel column and eluted with ethyl acetate/petroleum ether (v/v = 1:5) to afford the desired product **2**.

## 4. Mechanistic studies

We carried out some isotope labelling and KIE experiments under CO/O<sub>2</sub> (4/1, v/v). As shown in **Figures S1** and **S2**, small KIE values (26% yield, KIE = 1; 25% yield, KIE = 1) were obtained in the intra- and intermolecular reactions, respectively, suggesting that cyclometalation of the C–H bond is irreversible and C–H bond cleavage is not the rate-determining step. Meanwhile, the following investigation in **Figure S3** shows that the insertion of CO in the present carbonylative annulation is irreversible and **Figure S4** dedicates that the insertion of CO happened after the formation of the 6-membered rhodacycle.

### 4.1 Intramolecular kinetic isotope effect:

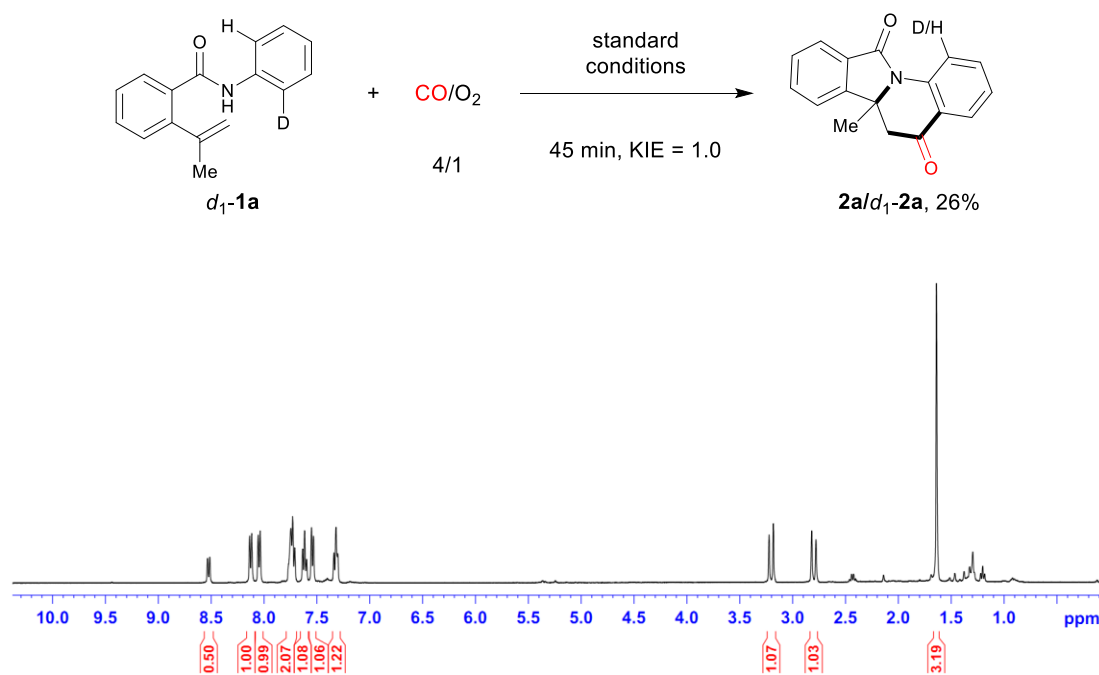

**Figure S1** The <sup>1</sup>H-NMR spectrum of the product **2a/d<sub>1</sub>-2a**.

### 4.2 Intermolecular kinetic isotope effect:

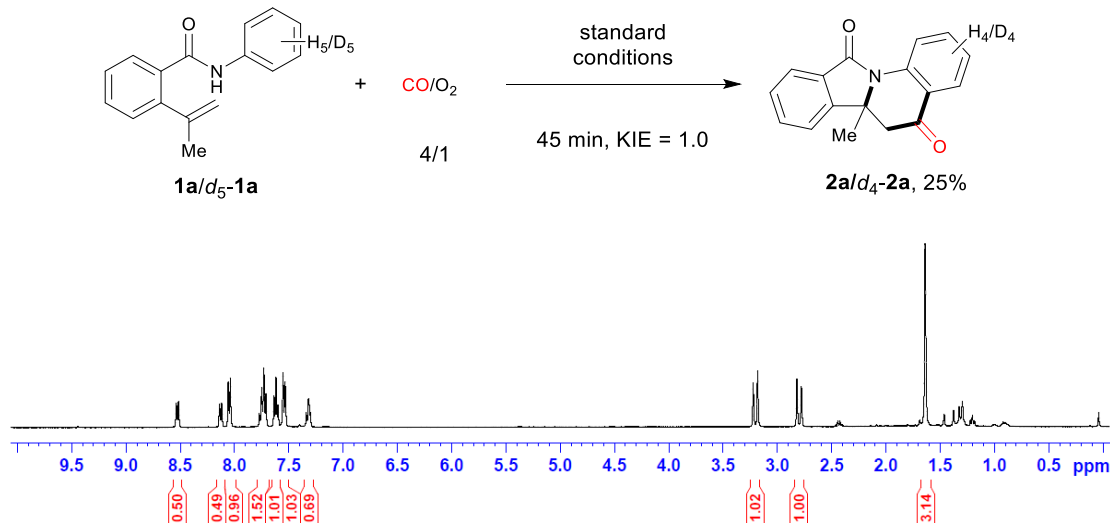

**Figure S2** The <sup>1</sup>H-NMR spectrum of the product **2a/d<sub>4</sub>-2a**.

### 4.3 Scrambling experiment using CD<sub>3</sub>CO<sub>2</sub>D:

To an oven-dried Schlenk tube equipped with a magnetic stir bar, **1a** (23.7 mg, 0.1 mmol), Rh(CO)<sub>2</sub>(acac) (1.3 mg, 5 mol%), Cu(OAc)<sub>2</sub>·H<sub>2</sub>O (6 mg, 30 mol%), CD<sub>3</sub>CO<sub>2</sub>D (32.5 mg, 5 eq) and PhCl (0.5 mL) were added. Then the tube was purged with CO/O<sub>2</sub> (4/1, v/v) for 5 times and the mixture was stirred at 135 °C for 20 h. After cooling to room temperature, the slurry was purified directly by pre-TLC to afford *d*-**2a** in 63% yield. The deuterium incorporations in the products were determined by <sup>1</sup>H NMR spectroscopy, and the result shows that the insertion of CO into the six-membered rhodacycle **E** in such carbonylation is irreversible (**Figure S3**).

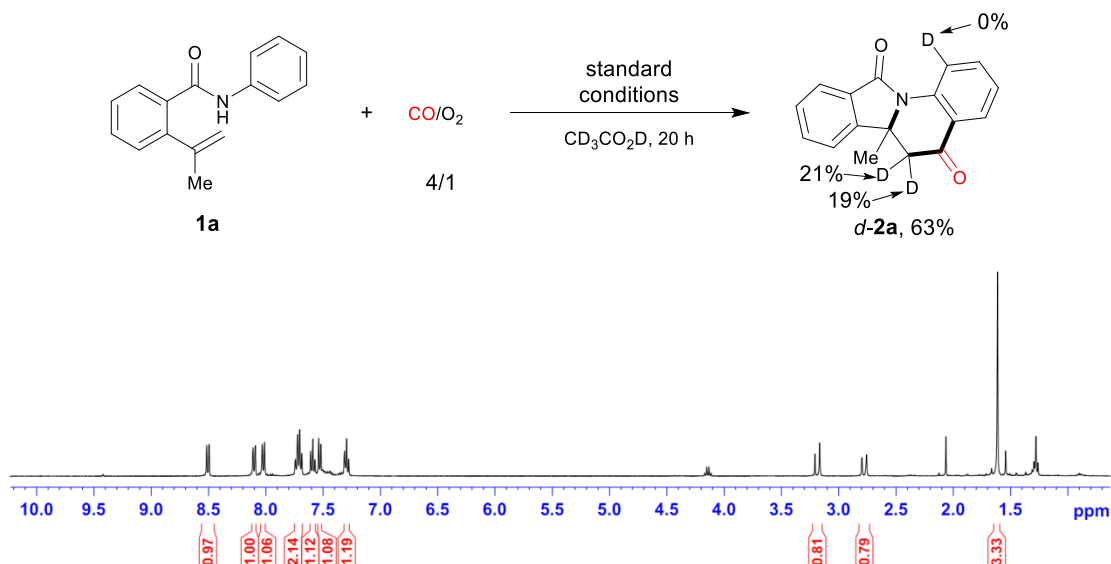

**Figure S3** The <sup>1</sup>H-NMR spectrum of the product *d*-**2a**.

### 4.4 Control experiments without CO or with nucleophile

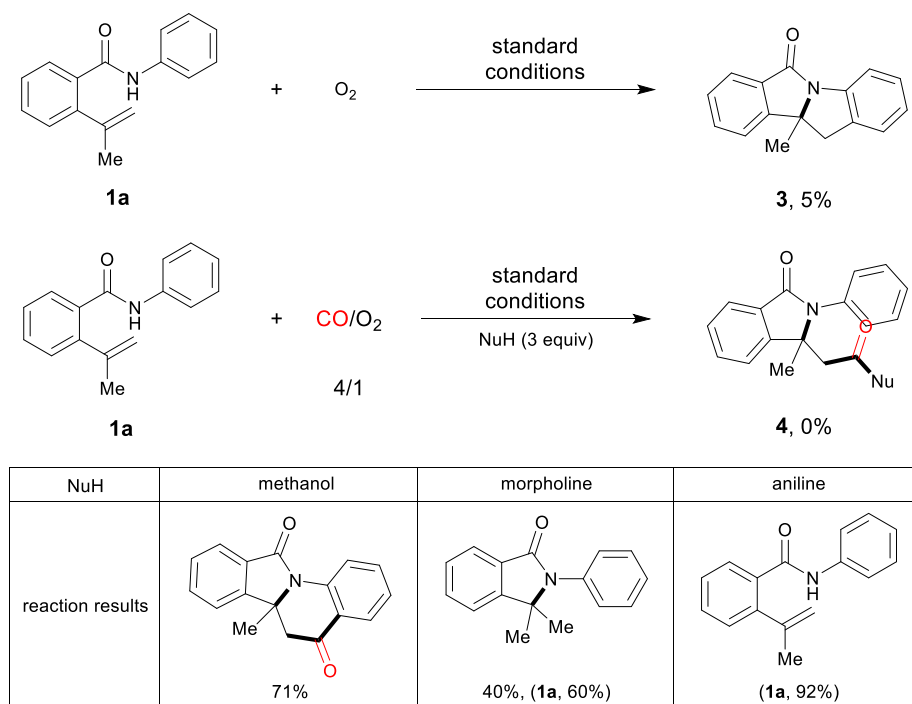

**Figure S4** The results of the control experiments.

## 5. Synthetic utility of the product

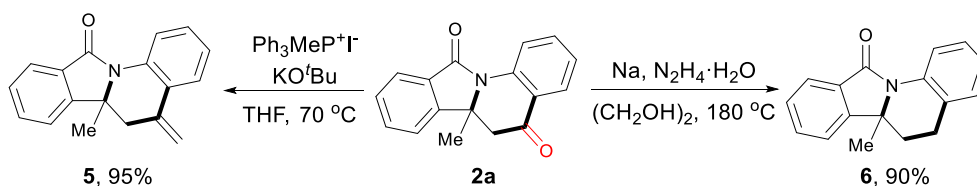

**Derived to compound 5:** In the nitrogen filled glovebox, to a suspension of  $\text{PPh}_3\text{MeI}$  (97 mg, 1.2 equiv) in anhydrous THF (10 mL) was added  $\text{KO}^t\text{Bu}$  (34 mg, 1.5 equiv). The resulting bright yellow mixture was stirred at room temperature for 30 min. Then **2a** (52.6 mg, 0.2 mmol) in THF (10 mL) was added into the yellow mixture, then stirred at 70 °C for overnight. After cooling to room temperature, the reaction was quenched by  $\text{H}_2\text{O}$  (5 mL), extracted with ethyl acetate (5 mL $\times$ 3) and washed with brine. The combined organic layers were dried over anhydrous  $\text{Na}_2\text{SO}_4$ , filtered and concentrated to give the crude product, which was subsequently purified by column chromatography using ethyl acetate/petroleum ether (v/v = 1:10) as eluent to afford the product **5** (49.6 mg, 95%) as white solid (m.p.: 110.5–112.0 °C).  $^1\text{H}$  NMR (400 MHz,  $\text{CDCl}_3$ )  $\delta$  8.44 (d,  $J$  = 8.2 Hz, 1H), 7.95 (d,  $J$  = 7.6 Hz, 1H), 7.78 (d,  $J$  = 7.9 Hz, 1H), 7.63 (t,  $J$  = 7.5 Hz, 1H), 7.52 (d,  $J$  = 7.5 Hz, 1H), 7.49 (d,  $J$  = 7.5 Hz, 1H), 7.41 (t,  $J$  = 7.7 Hz, 1H), 7.17 (t,  $J$  = 7.6 Hz, 1H), 5.81 (d,  $J$  = 2.1 Hz, 1H), 5.15 (d,  $J$  = 1.9 Hz, 1H), 2.93 (d,  $J$  = 14.0 Hz, 1H), 2.50 (d,  $J$  = 14.0 Hz, 1H), 1.41 (s, 3H).  $^{13}\text{C}$  NMR (100 MHz,  $\text{CDCl}_3$ )  $\delta$  165.7, 150.5, 136.7, 133.7, 132.5, 131.3, 129.3, 128.7, 124.6, 124.3, 124.23, 124.18, 122.1, 120.8, 112.3, 62.3, 42.7, 22.9. HRMS (ESI) calcd for  $\text{C}_{18}\text{H}_{15}\text{NONa}$   $[\text{M}+\text{Na}]^+$  284.1046, found 284.1045.

**Derived to compound 6<sup>1</sup>:** Under argon atmosphere, to a solution of sodium (14 mg, 0.6 mmol, 3.0 equiv) in ethylene glycol was added **2a** (52.6 mg, 0.2 mmol) and  $\text{N}_2\text{H}_4\cdot\text{H}_2\text{O}$  (39  $\mu\text{L}$ , 0.8 mmol, 4.0 equiv). The mixture was stirred at 180 °C for 5 h. After cooling to room temperature, the mixture was diluted with  $\text{H}_2\text{O}$  and extracted with  $\text{CH}_2\text{Cl}_2$  for three times. The combined organic layers were dried over anhydrous  $\text{Na}_2\text{SO}_4$ , and concentrated to give the crude product, which was purified by column chromatography using ethyl acetate/petroleum ether (v/v = 1:10) as eluent to afford the desired product **6** (44.8 mg, 90%) as white solid (m.p.: 157.5–159.1 °C).  $^1\text{H}$  NMR (400 MHz,  $\text{CDCl}_3$ )  $\delta$  8.37 (d,  $J$  = 7.9 Hz, 1H), 7.91–7.89 (m, 1H), 7.58–7.56 (m, 1H), 7.48–7.45 (m, 2H), 7.28–7.27 (m, 1H), 7.21–7.20 (m, 1H), 7.08 (m, 1H), 3.11–3.08 (m, 1H), 2.97 (d,  $J$  = 16.8 Hz, 1H), 2.35–2.32 (m, 1H), 1.71–1.65 (m, 1H), 1.42 (s, 3H).  $^{13}\text{C}$  NMR (100 MHz,  $\text{CDCl}_3$ )  $\delta$  165.7, 150.9, 134.9, 132.4, 131.2, 129.2, 128.5, 127.0, 125.5, 124.5, 124.2, 122.0, 120.8, 61.5, 32.4, 24.4, 22.2. HRMS (ESI) calcd for  $\text{C}_{17}\text{H}_{15}\text{NONa}$   $[\text{M}+\text{Na}]^+$  272.1046, found 272.1047.

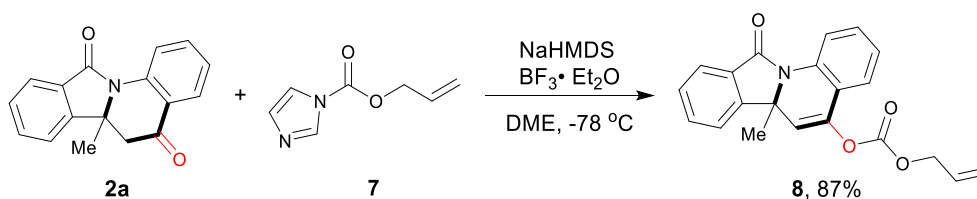

**Derived to compound 8<sup>2</sup>:** Under nitrogen atmosphere, a solution of **2a** (52.6 mg, 0.2 mol) in anhydrous 1,2-dimethoxyethane (DME) (3 mL) was added into an oven dried Schlenk tube and

cooled to  $-78\text{ }^{\circ}\text{C}$ , then sodium bis(trimethylsilyl)amide (NaHMDS) ( $300\ \mu\text{L}$ ,  $1\ \text{mol/L}$  in THF,  $1.5\ \text{equiv}$ ) was added dropwise. After stirring at this temperature for  $1\ \text{h}$ , to the mixture was added **7** ( $80\ \text{mg}$ ,  $1.3\ \text{equiv}$ ) in DME ( $4\ \text{mL}$ ) followed by  $\text{BF}_3\cdot\text{Et}_2\text{O}$  ( $48\%$  in  $\text{Et}_2\text{O}$ ,  $1.5\ \text{equiv}$ ). The mixture was further stirred at  $-78\text{ }^{\circ}\text{C}$  for  $3\ \text{h}$ . After that the reaction was quenched by saturate  $\text{NH}_4\text{Cl}$  solution and warmed to room temperature. The mixture was extracted with  $\text{Et}_2\text{O}$  for  $3$  times and the combined organic layers were dried over anhydrous  $\text{Na}_2\text{SO}_4$ , concentrated under vacuum. The residue was purified by column chromatography using ethyl acetate/petroleum ether ( $v/v = 1:5$ ) as eluent to afford the desired product **8** ( $62.5\ \text{mg}$ ,  $87\%$ ) as white solid (m.p.:  $76.2\text{--}77.3\text{ }^{\circ}\text{C}$ ).  $^1\text{H}$  NMR ( $400\ \text{MHz}$ ,  $\text{CDCl}_3$ )  $\delta$  8.06 (d,  $J = 8.4\ \text{Hz}$ ,  $1\text{H}$ ), 7.94-7.91 (m,  $1\text{H}$ ), 7.63 (td,  $J = 7.5, 1.2\ \text{Hz}$ ,  $1\text{H}$ ), 7.52-7.43 (m,  $3\text{H}$ ), 7.39 (d,  $J = 7.8, 1.5\ \text{Hz}$ ,  $1\text{H}$ ), 7.21 (td,  $J = 7.6, 1.2\ \text{Hz}$ ,  $1\text{H}$ ), 6.18 (s,  $1\text{H}$ ), 6.01-5.91 (m,  $1\text{H}$ ), 5.43-5.38 (m,  $1\text{H}$ ), 5.34-5.31 (m,  $1\text{H}$ ), 4.70 (d,  $J = 5.8\ \text{Hz}$ ,  $2\text{H}$ ), 1.63 (s,  $3\text{H}$ ).  $^{13}\text{C}$  NMR ( $100\ \text{MHz}$ ,  $\text{CDCl}_3$ )  $\delta$  166.5, 152.7, 148.3, 144.1, 133.6, 133.1, 131.1, 130.9, 130.1, 128.8, 124.94, 124.90, 122.9, 122.4, 122.2, 121.1, 119.8, 118.0, 69.5, 63.7, 27.4. HRMS (ESI) calcd for  $\text{C}_{21}\text{H}_{17}\text{NO}_4\text{Na}$   $[\text{M}+\text{Na}]^+$  370.1050, found 370.1050.



## 6. Experimental characterization data for products

### 6a-methyl-6,6a-dihydroisoindolo[2,1-a]quinoline-5,11-dione (2a):

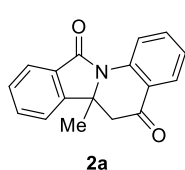

White solid (57.9 mg, 73%, m.p.: 131.6–132.3 °C). <sup>1</sup>HNMR (400 MHz, CDCl<sub>3</sub>) δ 8.48 (d, *J* = 8.3 Hz, 1H), 8.08 (dd, *J* = 7.8, 0.9 Hz, 1H), 8.00 (d, *J* = 7.6 Hz, 1H), 7.73-7.66 (m, 2H), 7.57 (t, *J* = 7.5 Hz, 1H), 7.50 (d, *J* = 7.6 Hz, 1H), 7.30-7.26 (m, 1H), 3.16 (d, *J* = 16.2 Hz, 1H), 2.76 (d, *J* = 16.2 Hz, 1H), 1.60 (s, 3H); <sup>13</sup>C NMR (100 MHz, CDCl<sub>3</sub>) δ 192.4, 165.4, 149.9, 139.2, 135.7, 133.3, 130.6, 129.3, 127.4, 125.1, 124.5, 122.4, 121.8, 121.0, 64.3, 48.7, 24.0. HRMS (ESI) calcd for C<sub>17</sub>H<sub>14</sub>NO<sub>2</sub> [M+H]<sup>+</sup> 264.1019, found 264.1019.

### 3,6a-dimethyl-6,6a-dihydroisoindolo[2,1-a]quinoline-5,11-dione (2b):

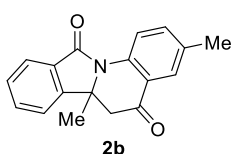

White solid (59.3 mg, 71%, m.p.: 207.6–209.1 °C). <sup>1</sup>HNMR (400 MHz, CDCl<sub>3</sub>) δ 8.33 (d, *J* = 8.4 Hz, 1H), 7.96 (d, *J* = 7.5 Hz, 1H), 7.85 (s, 1H), 7.66 (t, *J* = 7.5 Hz, 1H), 7.55-7.46 (m, 3H), 3.11 (d, *J* = 16.2 Hz, 1H), 2.71 (d, *J* = 16.2 Hz, 1H), 2.38 (s, 3H), 1.55 (s, 3H); <sup>13</sup>C NMR (100 MHz, CDCl<sub>3</sub>) δ 192.6, 165.2, 149.7, 136.8, 136.5, 134.3, 133.0, 130.7, 129.1, 127.2, 124.9, 122.0, 121.6, 120.9, 64.2, 48.6, 23.9, 20.9. HRMS (ESI) calcd for C<sub>18</sub>H<sub>15</sub>NO<sub>2</sub>Na [M+Na]<sup>+</sup> 300.0995, found 300.1011.

### 6a-methyl-3-phenyl-6,6a-dihydroisoindolo[2,1-a]quinoline-5,11-dione (2c):

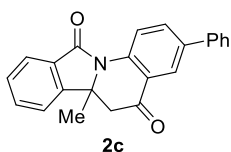

Pale yellow solid (63.1 mg, 62%, m.p.: 183.6–184.5 °C). <sup>1</sup>HNMR (400 MHz, CDCl<sub>3</sub>) δ 8.57 (d, *J* = 8.5 Hz, 1H), 8.32 (s, 1H), 8.02 (d, *J* = 7.6 Hz, 1H), 7.96 (d, *J* = 8.6 Hz, 1H), 7.71-7.64 (m, 3H), 7.58 (t, *J* = 7.4 Hz, 1H), 7.52-7.45 (m, 3H), 7.38 (t, *J* = 7.3 Hz, 1H), 3.19 (d, *J* = 16.1 Hz, 1H), 2.79 (d, *J* = 16.1 Hz, 1H), 1.63 (s, 3H); <sup>13</sup>C NMR (100 MHz, CDCl<sub>3</sub>) δ 192.5, 165.4, 149.8, 139.5, 138.3, 137.3, 134.2, 133.3, 130.6, 129.3, 129.1, 127.8, 127.0, 125.6, 125.1, 122.5, 122.2, 121.0, 64.3, 48.7, 24.1. HRMS (ESI) calcd for C<sub>23</sub>H<sub>17</sub>NO<sub>2</sub>Na [M+Na]<sup>+</sup> 362.1151, found 362.1143.

### 3-methoxy-6a-methyl-6,6a-dihydroisoindolo[2,1-a]quinoline-5,11-dione (2d):

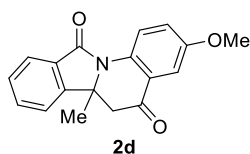

White solid (64.3 mg, 73%, m.p.: 150.2–151.7 °C). <sup>1</sup>HNMR (400 MHz, CDCl<sub>3</sub>) δ 8.33 (d, *J* = 9.0 Hz, 1H), 7.92 (d, *J* = 7.6 Hz, 1H), 7.62 (t, *J* = 7.4 Hz, 1H), 7.52-7.44 (m, 3H), 7.23-7.21 (m, 1H), 3.82 (s, 3H), 3.11 (d, *J* = 16.3 Hz, 1H), 2.69 (d, *J* = 16.2 Hz, 1H), 1.53 (s, 3H); <sup>13</sup>C NMR (100 MHz, CDCl<sub>3</sub>) δ 192.4, 165.1, 156.3, 149.6, 132.9<sub>8</sub>, 132.9<sub>6</sub>, 130.7, 129.1, 124.9, 123.6, 123.3, 123.1, 120.9, 109.1, 64.3, 55.7, 48.7, 23.8. HRMS (ESI) calcd for C<sub>18</sub>H<sub>15</sub>NO<sub>3</sub>Na [M+Na]<sup>+</sup> 316.0944, found 316.0938.

### 6a-methyl-3-phenoxy-6,6a-dihydroisoindolo[2,1-a]quinoline-5,11-dione (2e):

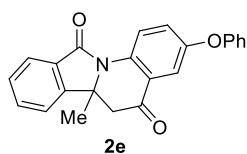

Pale yellow solid (69.1 mg, 65%, m.p.: 179.7–181.2 °C). <sup>1</sup>HNMR (400 MHz, CDCl<sub>3</sub>) δ 8.46 (d, *J* = 9.0 Hz, 1H), 8.00 (d, *J* = 7.6 Hz, 1H), 7.70–7.66 (m, 2H), 7.57 (t, *J* = 7.4 Hz, 1H), 7.49 (d, *J* = 7.5 Hz, 1H), 7.41–7.35 (m, 3H), 7.15 (d, *J* = 7.4 Hz, 1H), 7.04 (d, *J* = 7.8 Hz, 2H), 3.15 (d, *J* = 16.3 Hz, 1H), 2.73 (d, *J* = 16.3 Hz, 1H), 1.60 (s, 3H); <sup>13</sup>C NMR (100 MHz, CDCl<sub>3</sub>) δ 192.0, 165.3, 156.7, 154.1, 149.7, 134.7, 133.2, 130.6, 130.1, 129.3, 126.5, 125.0, 124.0, 123.6, 121.0, 119.2, 116.1, 64.3, 48.7, 23.9. HRMS (ESI) calcd for C<sub>23</sub>H<sub>17</sub>NO<sub>3</sub>Na [M+Na]<sup>+</sup> 378.1101, found 378.1102.

### 3-fluoro-6a-methyl-6,6a-dihydroisindolo[2,1-a]quinoline-5,11-dione (2f):

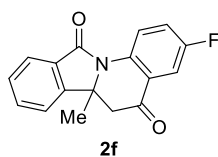

White solid (54.8 mg, 65%, m.p.: 168.2–169.5 °C). <sup>1</sup>HNMR (400 MHz, CDCl<sub>3</sub>) δ 8.46 (dd, *J* = 9.2, 4.6 Hz, 1H), 7.96 (d, *J* = 7.6 Hz, 1H), 7.72–7.65 (m, 2H), 7.56 (t, *J* = 7.5 Hz, 1H), 7.49 (d, *J* = 7.2 Hz, 1H), 7.41–7.36 (m, 1H), 3.16 (d, *J* = 16.3 Hz, 1H), 2.73 (d, *J* = 16.3 Hz, 1H), 1.56 (s, 3H); <sup>13</sup>C NMR (100 MHz, CDCl<sub>3</sub>) δ 191.5 (d, *J* = 1.7 Hz), 165.3, 159.2 (d, *J* = 245.0 Hz), 149.5, 135.4 (d, *J* = 2.5 Hz), 133.3, 130.3, 129.3, 125.0, 123.8 (d, *J* = 7.1 Hz), 123.7 (d, *J* = 6.3 Hz), 122.9 (d, *J* = 23.2 Hz), 121.0, 113.1 (d, *J* = 23.3 Hz), 64.3, 48.5, 23.8; <sup>19</sup>F NMR (376 MHz, CDCl<sub>3</sub>) δ -116.13. HRMS (ESI) calcd for C<sub>17</sub>H<sub>12</sub>FNO<sub>2</sub>Na [M+Na]<sup>+</sup> 304.0744, found 304.0749.

### 3-chloro-6a-methyl-6,6a-dihydroisindolo[2,1-a]quinoline-5,11-dione (2g):

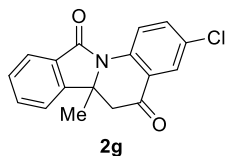

White solid (57.2 mg, 64%, m.p.: 217.6–219.2 °C). <sup>1</sup>HNMR (400 MHz, CDCl<sub>3</sub>) δ 8.45 (dd, *J* = 8.8, 1.0 Hz, 1H), 8.01 (dd, *J* = 2.6, 1.1 Hz, 1H), 7.97 (d, *J* = 7.6 Hz, 1H), 7.69 (t, *J* = 7.5 Hz, 1H), 7.64–7.61 (m, 1H), 7.57 (t, *J* = 7.5 Hz, 1H), 7.50 (dd, *J* = 7.6, 0.6 Hz, 1H), 3.16 (d, *J* = 16.2 Hz, 1H), 2.75 (d, *J* = 16.2 Hz, 1H), 1.57 (s, 3H); <sup>13</sup>C NMR (100 MHz, CDCl<sub>3</sub>) δ 191.3, 165.3, 149.6, 137.6, 135.4, 133.5, 130.2<sub>4</sub>, 130.2<sub>1</sub>, 129.4, 127.0, 125.1, 123.3, 123.2, 121.0, 64.2, 48.4, 24.0. HRMS (ESI) calcd for C<sub>17</sub>H<sub>12</sub>ClNO<sub>2</sub>Na [M+Na]<sup>+</sup> 320.0449, found 320.0447.

### 3-bromo-6a-methyl-6,6a-dihydroisindolo[2,1-a]quinoline-5,11-dione (2h):

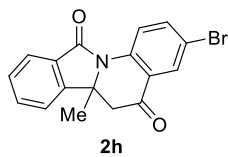

White solid (67.5 mg, 66%, m.p.: 175.2–177.5 °C). <sup>1</sup>HNMR (400 MHz, CDCl<sub>3</sub>) δ 8.40 (d, *J* = 8.8, 1H), 8.18 (s, 1H), 7.99 (d, *J* = 7.5 Hz, 1H), 7.78 (d, *J* = 8.7 Hz, 1H), 7.69 (t, *J* = 7.4 Hz, 1H), 7.58 (t, *J* = 7.3 Hz, 1H), 7.49 (d, *J* = 7.5 Hz, 1H), 3.16 (d, *J* = 16.2 Hz, 1H), 2.74 (d, *J* = 16.1 Hz, 1H), 1.58 (s, 3H); <sup>13</sup>C NMR (100 MHz, CDCl<sub>3</sub>) δ 191.2, 165.4, 149.7, 138.4, 138.1, 133.5, 130.3, 130.2, 129.4, 125.2, 123.6, 123.5, 121.0, 117.8, 64.2, 48.4, 24.0. HRMS (ESI) calcd for C<sub>17</sub>H<sub>12</sub>BrNO<sub>2</sub>Na [M+Na]<sup>+</sup> 363.9944, found 363.9945.

### 6a-methyl-5,11-dioxo-5,6,6a,11-tetrahydroisindolo[2,1-a]quinoline-3-carbonitrile (2i):

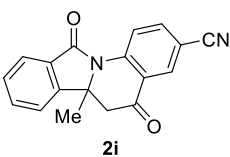

White solid (46.1 mg, 53%, m.p.: 218.3–220.6 °C). <sup>1</sup>HNMR (400 MHz, CDCl<sub>3</sub>) δ 8.68 (d, *J* = 8.6 Hz, 1H), 8.36 (s, 1H), 8.00 (d, *J* = 7.6 Hz, 1H), 7.91 (d, *J* = 8.7 Hz, 1H), 7.73 (t, *J* = 7.5 Hz, 1H), 7.60 (t, *J* = 7.5 Hz, 1H), 7.52 (d, *J* = 7.6 Hz, 1H), 3.22 (d, *J* = 16.2 Hz, 1H), 2.78 (d, *J* = 16.2 Hz, 1H), 1.59 (s, 3H); <sup>13</sup>C NMR (100 MHz, CDCl<sub>3</sub>) δ 190.5, 165.7, 149.6, 142.3, 138.1, 134.1,

132.1, 129.72, 129.70, 125.5, 122.33, 122.31, 121.1, 118.0, 107.9, 64.3, 48.1, 24.3. HRMS (ESI) calcd for C<sub>18</sub>H<sub>12</sub>N<sub>2</sub>O<sub>2</sub>Na [M+Na]<sup>+</sup> 311.0791, found 311.0782.

**3-acetyl-6a-methyl-6,6a-dihydroisindolo[2,1-a]quinoline-5,11-dione (2j):**

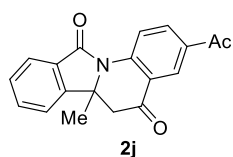

White solid (50.2 mg, 55%, m.p.: 243.6–245.1 °C). <sup>1</sup>HNMR (400 MHz, CDCl<sub>3</sub>) δ 8.63-8.61 (m, 2H), 8.30 (d, *J* = 8.8 Hz, 1H), 8.00 (d, *J* = 7.6 Hz, 1H), 7.71 (t, *J* = 7.3 Hz, 1H), 7.59 (t, *J* = 7.4 Hz, 1H), 7.51 (d, *J* = 7.5 Hz, 1H), 3.21 (d, *J* = 16.3 Hz, 1H), 2.79 (d, *J* = 16.1 Hz, 1H), 2.65 (s, 3H), 1.59 (s, 3H); <sup>13</sup>C NMR (100 MHz, CDCl<sub>3</sub>) δ 196.5, 191.7, 165.7, 149.7, 142.8, 134.9, 133.8, 132.9, 130.1, 129.5, 128.3, 125.3, 121.7, 121.1, 64.3, 48.3, 26.7, 24.3. HRMS (ESI) calcd for C<sub>19</sub>H<sub>15</sub>NO<sub>3</sub>Na [M+Na]<sup>+</sup> 328.0944, found 328.0948.

**6a-methyl-3-(trifluoromethyl)-6,6a-dihydroisindolo[2,1-a]quinoline-5,11-dione (2k):**

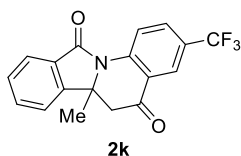

White solid (58.6 mg, 59%, m.p.: 180.7–182.5 °C). <sup>1</sup>HNMR (400 MHz, CDCl<sub>3</sub>) δ 8.64 (d, *J* = 8.6 Hz, 1H), 8.34 (s, 1H), 7.98 (d, *J* = 7.5 Hz, 1H), 7.90 (d, *J* = 8.6 Hz, 1H), 7.71 (t, *J* = 7.4 Hz, 1H), 7.58 (t, *J* = 7.4 Hz, 1H), 7.51 (d, *J* = 7.6 Hz, 1H), 3.21 (d, *J* = 16.2 Hz, 1H), 2.79 (d, *J* = 16.2 Hz, 1H), 1.59 (s, 3H); <sup>13</sup>C NMR (100 MHz, CDCl<sub>3</sub>) δ 191.2, 165.6, 149.6, 141.7, 133.8, 132.0 (q, *J* = 3.6 Hz), 130.0, 129.5, 126.4 (q, *J* = 33.6 Hz), 125.3, 124.9 (q, *J* = 3.9 Hz), 123.7 (q, *J* = 270 Hz), 122.1, 122.0, 121.1, 64.3, 48.3, 24.1; <sup>19</sup>F NMR (376 MHz, CDCl<sub>3</sub>) δ -62.54. HRMS (ESI) calcd for C<sub>18</sub>H<sub>12</sub>F<sub>3</sub>NO<sub>2</sub>Na [M+Na]<sup>+</sup> 354.0712, found 354.0715.

**methyl 6a-methyl-5,11-dioxo-5,6,6a,11-tetrahydroisindolo[2,1-a]quinoline-3-carboxylate (2l):**

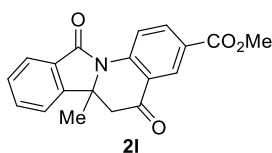

White solid (66.5 mg, 69%, m.p.: 226.5–227.9 °C). <sup>1</sup>HNMR (400 MHz, CDCl<sub>3</sub>) δ 8.74 (s, 1H), 8.61 (d, *J* = 8.9 Hz, 1H), 8.34 (d, *J* = 8.4 Hz, 1H), 8.00 (d, *J* = 7.7 Hz, 1H), 7.71 (t, *J* = 7.4 Hz, 1H), 7.59 (t, *J* = 7.3 Hz, 1H), 7.51 (d, *J* = 7.3 Hz, 1H), 3.94 (s, 3H), 3.20 (d, *J* = 16.3 Hz, 1H), 2.78 (d, *J* = 16.2 Hz, 1H), 1.59 (s, 3H); <sup>13</sup>C NMR (100 MHz, CDCl<sub>3</sub>) δ 191.6, 166.0, 165.7, 149.7, 142.6, 136.4, 133.8, 130.1, 129.5, 129.4, 126.1, 125.3, 121.9, 121.5, 121.1, 64.3, 52.5, 48.4, 24.3. HRMS (ESI) calcd for C<sub>19</sub>H<sub>15</sub>NO<sub>4</sub>Na [M+Na]<sup>+</sup> 344.0893, found 344.0893.

**1-fluoro-6a-methyl-6,6a-dihydroisindolo[2,1-a]quinoline-5,11-dione (2m):**

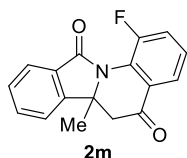

White solid (59.0 mg, 70%, m.p.: 190.8–192.5 °C). <sup>1</sup>HNMR (400 MHz, CDCl<sub>3</sub>) δ 7.99 (d, *J* = 7.3 Hz, 1H), 7.86 (d, *J* = 7.5 Hz, 1H), 7.67 (t, *J* = 7.0 Hz, 1H), 7.56 (t, *J* = 7.2 Hz, 1H), 7.51-7.47 (m, 2H), 7.32-7.31 (m, 1H), 3.14 (d, *J* = 16.8 Hz, 1H), 2.68 (d, *J* = 16.9 Hz, 1H), 1.63 (s, 3H); <sup>13</sup>C NMR (100 MHz, CDCl<sub>3</sub>) δ 191.7 (d, *J* = 2.9 Hz), 164.4, 155.7 (d, *J* = 270 Hz), 150.2, 133.2, 130.0 (d, *J* = 1.3 Hz), 129.3, 126.9 (d, *J* = 13.8 Hz), 126.4 (d, *J* = 7.4 Hz), 125.7 (d, *J* = 1.8 Hz), 125.3, 123.4 (q, *J* = 20.3 Hz), 122.9 (d, *J* = 3.3 Hz), 121.0, 64.6, 50.7, 22.6; <sup>19</sup>F NMR (376 MHz, CDCl<sub>3</sub>) δ -112.55. HRMS (ESI) calcd for C<sub>17</sub>H<sub>12</sub>FNO<sub>2</sub>Na [M+Na]<sup>+</sup> 304.0744, found 304.0753.

**2-chloro-6a-methyl-6,6a-dihydroisindolo[2,1-a]quinoline-5,11-dione (2n):**

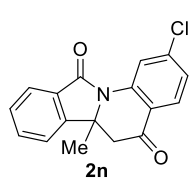

White solid (68.2 mg, 76%, m.p.: 196.1–197.6 °C). <sup>1</sup>HNMR (400 MHz, CDCl<sub>3</sub>) δ 8.54 (s, 1H), 8.00 (t, *J* = 8.0 Hz, 2H), 7.71 (t, *J* = 7.6 Hz, 1H), 7.59 (t, *J* = 7.5 Hz, 1H), 7.51 (d, *J* = 7.6 Hz, 1H), 7.24 (d, *J* = 8.6 Hz, 1H), 3.16 (d, *J* = 16.0 Hz, 1H), 2.75 (d, *J* = 16.0 Hz, 1H), 1.59 (s, 3H); <sup>13</sup>C NMR (100 MHz, CDCl<sub>3</sub>) δ 191.4, 165.4, 149.7, 142.1, 139.9, 133.6, 130.1, 129.4, 128.7, 125.2, 125.0, 121.6, 121.0, 120.6, 64.4, 48.3, 24.2. HRMS (ESI) calcd for C<sub>17</sub>H<sub>12</sub>ClNO<sub>2</sub>Na [M+Na]<sup>+</sup> 320.0449, found 320.0451.

**2,3-dichloro-6a-methyl-6,6a-dihydroisindolo[2,1-a]quinoline-5,11-dione (2o):**

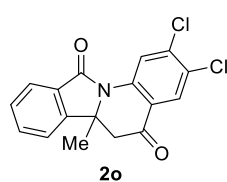

White solid (64.8 mg, 65%, m.p.: 213.9–215.6 °C). <sup>1</sup>HNMR (400 MHz, CDCl<sub>3</sub>) δ 8.66 (s, 1H), 8.11 (s, 1H), 7.97 (d, *J* = 7.4 Hz, 1H), 7.70 (t, *J* = 7.1 Hz, 1H), 7.58 (t, *J* = 7.2 Hz, 1H), 7.49 (d, *J* = 7.4, 1H), 3.16 (d, *J* = 16.2 Hz, 1H), 2.75 (d, *J* = 16.4 Hz, 1H), 1.57 (s, 3H); <sup>13</sup>C NMR (100 MHz, CDCl<sub>3</sub>) δ 190.5, 165.3, 149.5, 140.1, 137.8, 133.7, 129.9, 129.5, 128.8, 125.3, 123.4, 121.7, 121.0, 64.3, 48.2, 24.2. HRMS (ESI) calcd for C<sub>17</sub>H<sub>11</sub>Cl<sub>2</sub>NO<sub>2</sub>Na [M+Na]<sup>+</sup> 354.0059, found 354.0060.

**6a-methyl-6,6a-dihydro-[1,3]dioxolo[4,5-g]isindolo[2,1-a]quinoline-5,11-dione (2p):**

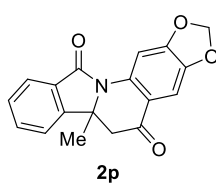

White solid (35.2 mg, 38%, m.p.: 211.5–213.5 °C). <sup>1</sup>HNMR (400 MHz, CDCl<sub>3</sub>) δ 7.99-7.98 (m, 2H), 7.68 (t, *J* = 7.5, 1.2 Hz, 1H), 7.56 (t, *J* = 7.5 Hz, 1H), 7.49-7.47 (m, 2H), 6.09-6.08 (m, 2H), 3.08 (d, *J* = 16.4 Hz, 1H), 2.68 (d, *J* = 16.4 Hz, 1H), 1.59 (s, 3H); <sup>13</sup>C NMR (100 MHz, CDCl<sub>3</sub>) δ 190.8, 165.3, 153.8, 149.8, 145.2, 136.4, 133.2, 130.6, 129.2, 125.0, 121.0, 117.2, 105.6, 102.5, 102.3, 64.7, 48.3, 23.9. HRMS (ESI) calcd for C<sub>18</sub>H<sub>13</sub>NO<sub>4</sub>Na [M+Na]<sup>+</sup> 330.0737, found 330.0739.

**7a-methyl-7,7a-dihydro-[1,3]dioxolo[4,5-f]isindolo[2,1-a]quinoline-6,12-dione (2p'):**

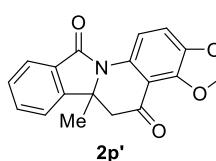

White solid (34.7 mg, 38%, m.p.: 239.8–241.4 °C). <sup>1</sup>HNMR (400 MHz, CDCl<sub>3</sub>) δ 7.98 (d, *J* = 7.6 Hz, 1H), 7.93 (d, *J* = 8.6 Hz, 1H), 7.67 (td, *J* = 7.5, 1.1 Hz, 1H), 7.56 (td, *J* = 7.5, 1.0 Hz, 1H), 7.47 (d, *J* = 7.6 Hz, 1H), 7.12 (d, *J* = 8.6 Hz, 1H), 6.18 (dd, *J* = 19.0, 1.2 Hz, 2H), 3.13 (d, *J* = 16.3 Hz, 1H), 2.71 (d, *J* = 16.3 Hz, 1H), 1.61 (s, 3H); <sup>13</sup>C NMR (100 MHz, CDCl<sub>3</sub>) δ 191.4, 165.2, 149.4, 147.9, 145.4, 133.1, 132.0, 130.7, 129.2, 124.9, 120.9, 114.5, 114.0, 108.8, 103.1, 64.3, 49.4, 23.8. HRMS (ESI) calcd for C<sub>18</sub>H<sub>13</sub>NO<sub>4</sub>Na [M+Na]<sup>+</sup> 330.0737, found 330.0735.

**2,4,6a-trimethyl-6,6a-dihydroisindolo[2,1-a]quinoline-5,11-dione (2q):**

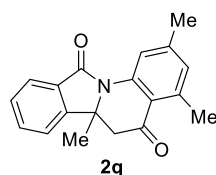

White solid (56.9 mg, 65%, m.p.: 199.8–201.3 °C). <sup>1</sup>HNMR (400 MHz, CDCl<sub>3</sub>) δ 8.17 (s, 1H), 7.99 (d, *J* = 7.5 Hz, 1H), 7.66 (t, *J* = 7.5 Hz, 1H), 7.56 (t, *J* = 7.5 Hz, 1H), 7.48 (d, *J* = 7.5 Hz, 1H), 6.90 (s, 1H), 3.06 (d, *J* = 16.0 Hz, 1H), 2.73-2.68 (m, 4H), 2.43 (s, 3H), 1.58 (s, 3H); <sup>13</sup>C NMR (100 MHz, CDCl<sub>3</sub>) δ 193.7, 165.4, 150.0, 145.4, 142.2, 140.2, 133.1, 130.8,

129.7, 129.1, 125.0, 120.9, 120.6, 118.7, 64.0, 50.4, 23.52, 23.48, 22.1. HRMS (ESI) calcd for  $C_{19}H_{17}NO_2Na$   $[M+Na]^+$  314.1151, found 314.1152.

**2,3,4-trimethoxy-6a-methyl-6,6a-dihydroisindolo[2,1-a]quinoline-5,11-dione (2r):**

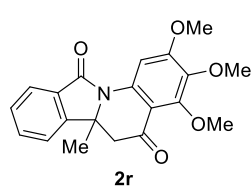

White solid (68.9 mg, 65%, m.p.: 168.4–170.2 °C).  $^1H$ NMR (400 MHz,  $CDCl_3$ )  $\delta$  7.98-7.95 (m, 2H), 7.68 (t,  $J = 7.4$  Hz, 1H), 7.57 (t,  $J = 7.4$  Hz, 1H), 7.49 (d,  $J = 7.6$ , 1H), 4.03 (s, 3H), 3.95 (s, 3H), 3.89 (s, 3H), 3.04 (d,  $J = 16.0$  Hz, 1H), 2.68 (d,  $J = 16.0$  Hz, 1H), 1.62 (s, 3H);  $^{13}C$  NMR (100 MHz,  $CDCl_3$ )  $\delta$  190.0, 165.6, 158.7, 155.1, 149.9, 139.9, 137.0, 133.2, 130.5, 129.2, 124.8, 120.9, 110.7, 101.0, 64.3, 61.7, 61.3, 56.4, 49.9, 23.5. HRMS (ESI) calcd for  $C_{20}H_{19}NO_5Na$   $[M+Na]^+$  376.1155, found 376.1154.

**6a,7-dimethyl-6,6a-dihydroisindolo[2,1-a]quinoline-5,11-dione (2s):**

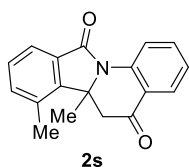

White solid (63.7 mg, 77%, m.p.: 126.3–127.7 °C).  $^1H$ NMR (400 MHz,  $CDCl_3$ )  $\delta$  8.51 (d,  $J = 8.2$  Hz, 1H), 8.07 (d,  $J = 7.8$  Hz, 1H), 7.84 (d,  $J = 6.8$  Hz, 1H), 7.70 (t,  $J = 7.7$  Hz, 1H), 7.47-7.42 (m, 2H), 7.29-7.25 (m, 1H), 3.42 (d,  $J = 16.3$  Hz, 1H), 2.88 (d,  $J = 16.2$  Hz, 1H), 2.54 (s, 3H), 1.66 (s, 3H);  $^{13}C$  NMR (100 MHz,  $CDCl_3$ )  $\delta$  192.5, 165.4, 147.0, 139.0, 135.7, 135.4, 132.1, 131.0, 129.2, 127.2, 124.4, 122.7, 122.3, 121.8, 65.2, 46.9, 21.7, 18.7. HRMS (ESI) calcd for  $C_{18}H_{15}NO_2Na$   $[M+Na]^+$  300.0995, found 300.1003.

**8-fluoro-6a-methyl-6,6a-dihydroisindolo[2,1-a]quinoline-5,11-dione (2t):**

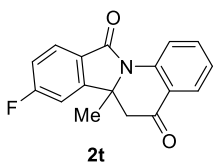

White solid (66.1 mg, 78%, m.p.: 192.6–193.2 °C).  $^1H$  NMR (400 MHz,  $CDCl_3$ )  $\delta$  8.44 (d,  $J = 8.0$  Hz, 1H), 8.08 (dd,  $J = 7.9, 1.5$  Hz, 1H), 7.99 (dd,  $J = 8.4, 4.9$  Hz, 1H), 7.70 (td,  $J = 8.5, 8.0, 1.6$  Hz, 1H), 7.30-7.24 (m, 2H), 7.19 (dd,  $J = 7.8, 2.1$  Hz, 1H), 3.13 (d,  $J = 16.1$  Hz, 1H), 2.78 (d,  $J = 16.1$  Hz, 1H), 1.60 (s, 3H);  $^{13}C$  NMR (100 MHz,  $CDCl_3$ )  $\delta$  191.8, 166.1 (d,  $J = 254.7$  Hz), 164.3, 152.3 (d,  $J = 9.5$  Hz), 139.1, 135.7, 127.5, 127.4 (d,  $J = 10.3$  Hz), 126.7 (d,  $J = 2.2$  Hz), 124.6, 122.3, 121.6, 117.2 (d,  $J = 23.5$  Hz), 108.6 (d,  $J = 24.3$  Hz), 64.0 (d,  $J = 2.7$  Hz), 48.5, 23.9;  $^{19}F$  NMR (376 MHz,  $CDCl_3$ )  $\delta$  -103.98. HRMS (ESI) calcd for  $C_{17}H_{12}FNO_2Na$   $[M+Na]^+$  304.0744, found 304.0753.

**8-chloro-6a-methyl-6,6a-dihydroisindolo[2,1-a]quinoline-5,11-dione (2u):**

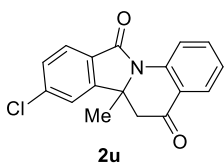

White solid (67.5 mg, 76%, m.p.: 197.4–199.2 °C).  $^1H$ NMR (400 MHz,  $CDCl_3$ )  $\delta$  8.46 (d,  $J = 8.5$  Hz, 1H), 8.09 (d,  $J = 7.6$  Hz, 1H), 7.93 (d,  $J = 8.0$  Hz, 1H), 7.71 (t,  $J = 7.5$  Hz, 1H), 7.55 (d,  $J = 8.2$  Hz, 1H), 7.48 (s, 1H), 7.31-7.26 (m, 1H), 3.13 (d,  $J = 16.4$  Hz, 1H), 2.77 (d,  $J = 16.1$  Hz, 1H), 1.60 (s, 3H);  $^{13}C$  NMR (100 MHz,  $CDCl_3$ )  $\delta$  191.8, 164.3, 151.2, 139.6, 138.9, 135.8, 129.9, 129.1, 127.5, 126.3, 124.7, 122.2, 121.7, 121.6, 64.1, 48.4, 23.9. HRMS (ESI) calcd for  $C_{17}H_{12}ClNO_2Na$   $[M+Na]^+$  320.0449, found 320.0458.

**8-methoxy-6a-methyl-6,6a-dihydroisindolo[2,1-a]quinoline-5,11-dione (2v):**

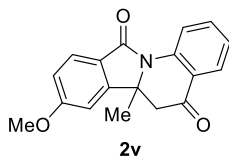

White solid (58.1 mg, 66%, m.p.: 181.6–182.7 °C). <sup>1</sup>HNMR (400 MHz, CDCl<sub>3</sub>) δ 8.45 (d, *J* = 8.0 Hz, 1H), 8.05 (d, *J* = 7.7 Hz, 1H), 7.90 (d, *J* = 8.4 Hz, 1H), 7.68 (t, *J* = 7.6 Hz, 1H), 7.24 (t, *J* = 7.3 Hz, 1H), 7.07 (d, *J* = 8.4 Hz, 1H), 6.94 (s, 1H), 3.93 (s, 3H), 3.11 (d, *J* = 16.1 Hz, 1H), 2.77 (d, *J* = 16.2 Hz, 1H), 1.58 (s, 3H); <sup>13</sup>C NMR (100 MHz, CDCl<sub>3</sub>) δ 192.4, 165.2, 164.1, 152.2, 139.4, 135.6, 127.3, 126.6, 124.1, 122.9, 122.1, 121.5, 115.7, 105.8, 63.8, 55.9, 48.6, 24.0. HRMS (ESI) calcd for C<sub>18</sub>H<sub>15</sub>NO<sub>3</sub>Na [M+Na]<sup>+</sup> 316.0944, found 316.0946.

**9-chloro-6a-methyl-6,6a-dihydroisoindolo[2,1-a]quinoline-5,11-dione (2w):**

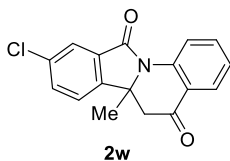

White solid (63.1 mg, 71%, m.p.: 178.1–179.3 °C). <sup>1</sup>HNMR (400 MHz, CDCl<sub>3</sub>) δ 8.42 (d, *J* = 8.1 Hz, 1H), 8.07 (d, *J* = 7.7 Hz, 1H), 7.92 (s, 1H), 7.72-7.63 (m, 2H), 7.46 (d, *J* = 8.0 Hz, 1H), 7.31-7.27 (m, 1H), 3.15 (d, *J* = 16.2 Hz, 1H), 2.77 (d, *J* = 16.2 Hz, 1H), 1.59 (s, 3H); <sup>13</sup>C NMR (100 MHz, CDCl<sub>3</sub>) δ 191.9, 163.9, 147.9, 138.8, 135.7, 135.5, 133.4, 132.3, 127.4, 125.0, 124.8, 122.3, 122.2, 121.7, 64.2, 48.4, 23.9. HRMS (ESI) calcd for C<sub>17</sub>H<sub>12</sub>ClNO<sub>2</sub>Na [M+Na]<sup>+</sup> 320.0449, found 320.0456.

**9-methoxy-6a-methyl-6,6a-dihydroisoindolo[2,1-a]quinoline-5,11-dione (2x):**

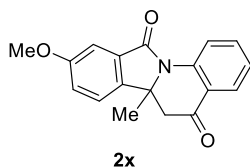

White solid (58.1 mg, 66%, m.p.: 198.3–199.6 °C). <sup>1</sup>HNMR (400 MHz, CDCl<sub>3</sub>) δ 8.45 (d, *J* = 8.2 Hz, 1H), 8.07 (d, *J* = 7.8 Hz, 1H), 7.70 (t, *J* = 7.7 Hz, 1H), 7.44 (s, 1H), 7.39 (d, *J* = 8.2 Hz, 1H), 7.29-7.21 (m, 2H), 3.91 (s, 3H), 3.13 (d, *J* = 16.2 Hz, 1H), 2.72 (d, *J* = 16.1 Hz, 1H), 1.56 (s, 3H); <sup>13</sup>C NMR (100 MHz, CDCl<sub>3</sub>) δ 192.5, 165.3, 160.7, 142.3, 139.2, 135.6, 131.9, 127.4, 124.4, 122.3, 121.9, 121.7, 121.6, 107.2, 64.0, 55.9, 48.9, 24.0. HRMS (ESI) calcd for C<sub>18</sub>H<sub>15</sub>NO<sub>3</sub>Na [M+Na]<sup>+</sup> 316.0944, found 316.0945.

**6a,10-dimethyl-6,6a-dihydroisoindolo[2,1-a]quinoline-5,11-dione (2y):**

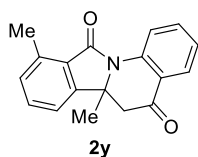

White solid (60.7 mg, 73%, m.p.: 155.1–156.8 °C). <sup>1</sup>HNMR (400 MHz, CDCl<sub>3</sub>) δ 8.47 (d, *J* = 8.3 Hz, 1H), 8.07 (d, *J* = 7.8 Hz, 1H), 7.69 (t, *J* = 7.7 Hz, 1H), 7.52 (t, *J* = 7.5 Hz, 1H), 7.30-7.24 (m, 3H), 3.12 (d, *J* = 16.2 Hz, 1H), 2.80 (s, 3H), 2.73 (d, *J* = 16.5 Hz, 1H), 1.57 (s, 3H); <sup>13</sup>C NMR (100 MHz, CDCl<sub>3</sub>) δ 192.6, 166.3, 150.5, 139.4, 139.3, 135.6, 132.7, 131.1, 127.5, 127.4, 124.3, 122.3, 121.6, 118.3, 63.3, 48.8, 24.1, 17.7. HRMS (ESI) calcd for C<sub>18</sub>H<sub>15</sub>NO<sub>2</sub>Na [M+Na]<sup>+</sup> 300.0995, found 300.1002.

**6a-methyl-6,6a-dihydrobenzo[5,6]isoindolo[2,1-a]quinoline-5,13-dione (2z):**

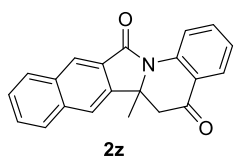

White solid (57.5 mg, 61%, m.p.: 221.2–223.4 °C). <sup>1</sup>HNMR (400 MHz, CDCl<sub>3</sub>) δ 8.56-8.54 (m, 2H), 8.12-8.06 (m, 2H), 7.98 (d, *J* = 7.7 Hz, 1H), 7.90 (s, 1H), 7.74-7.70 (m, 1H), 7.66-7.59 (m, 2H), 7.31-7.27 (m, 1H), 3.26 (d, *J* = 16.3 Hz, 1H), 2.86 (d, *J* = 16.3 Hz, 1H), 1.69 (s, 3H); <sup>13</sup>C NMR (100 MHz, CDCl<sub>3</sub>) δ 192.4, 165.3, 144.6, 139.3, 135.9, 135.7, 133.5, 129.9, 128.6, 128.5, 128.4, 127.5, 127.0, 125.9, 124.7, 122.5, 122.0, 120.0, 64.4, 49.3, 24.7. HRMS (ESI) calcd for C<sub>21</sub>H<sub>15</sub>NO<sub>2</sub>Na [M+Na]<sup>+</sup> 336.0995, found 336.0993.

**6a-ethyl-6,6a-dihydroisindolo[2,1-a]quinoline-5,11-dione (2aa):**

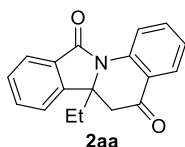

White solid (50.1 mg, 60%, m.p.: 156.4–160.1 °C). <sup>1</sup>H NMR (400 MHz, CDCl<sub>3</sub>) δ 8.48 (d, *J* = 8.2 Hz, 1H), 8.07 (d, *J* = 7.8 Hz, 1H), 8.00 (d, *J* = 7.6 Hz, 1H), 7.74–7.60 (m, 2H), 7.56 (t, *J* = 7.4 Hz, 1H), 7.46 (d, *J* = 7.5 Hz, 1H), 7.29–7.25 (m, 1H), 3.19 (d, *J* = 16.4 Hz, 1H), 2.82 (d, *J* = 16.4 Hz, 1H), 2.19–2.10 (m, 1H), 2.02–1.93 (m, 1H), 0.41 (t, *J* = 7.1 Hz, 3H); <sup>13</sup>C NMR (100 MHz, CDCl<sub>3</sub>) δ 192.5, 166.0, 147.6, 139.0, 135.6, 133.2, 131.8, 129.2, 127.4, 124.8, 124.5, 122.6, 121.6, 120.9, 67.3, 48.3, 28.6, 7.5. HRMS (ESI) calcd for C<sub>18</sub>H<sub>15</sub>NO<sub>2</sub>Na [M+Na]<sup>+</sup> 300.0995, found 300.1002.

**6a-methyl-6,6a,7,8,9,10-hexahydroisindolo[2,1-a]quinoline-5,11-dione (2ac):**

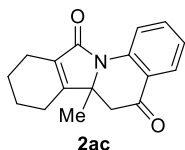

White solid (52.6 mg, 66%, m.p.: 148.5–150.3 °C). <sup>1</sup>H NMR (400 MHz, CDCl<sub>3</sub>) δ 8.29 (d, *J* = 8.3 Hz, 1H), 7.99 (d, *J* = 7.9 Hz, 1H), 7.65–7.61 (m, 1H), 7.18 (t, *J* = 7.6 Hz, 1H), 2.83 (d, *J* = 15.8 Hz, 1H), 2.53 (d, *J* = 15.8 Hz, 1H), 2.39–2.21 (m, 4H), 1.84–1.73 (m, 4H), 1.35 (s, 3H); <sup>13</sup>C NMR (100 MHz, CDCl<sub>3</sub>) δ 192.7, 168.3, 160.4, 139.5, 135.7, 131.2, 127.3, 123.6, 122.0, 121.0, 65.4, 46.9, 22.1, 21.9, 21.6, 21.4, 20.1. HRMS (ESI) calcd for C<sub>17</sub>H<sub>17</sub>NO<sub>2</sub>Na [M+Na]<sup>+</sup> 290.1151, found 290.1150.

**3-(*tert*-butyl)-6a-methyl-6,6a,7,8,9,10-hexahydroisindolo[2,1-a]quinoline-5,11-dione (2ad):**

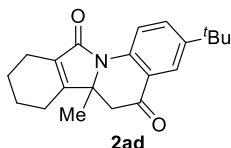

White solid (60.3 mg, 62%, m.p.: 233.7–235.5 °C). <sup>1</sup>H NMR (400 MHz, CDCl<sub>3</sub>) δ 8.22 (d, *J* = 8.7 Hz, 1H), 8.00 (d, *J* = 2.5 Hz, 1H), 7.70 (dd, *J* = 8.7, 2.5 Hz, 1H), 2.83 (d, *J* = 15.8 Hz, 1H), 2.52 (d, *J* = 15.8 Hz, 1H), 2.34–2.20 (m, 4H), 1.90–1.71 (m, 4H), 1.36 (s, 3H), 1.34 (s, 9H); <sup>13</sup>C NMR (100 MHz, CDCl<sub>3</sub>) δ 192.98, 168.16, 160.14, 146.63, 137.13, 133.27, 131.18, 123.45, 121.44, 120.68, 65.40, 47.01, 34.67, 31.29, 22.07, 21.90, 21.63, 21.41, 20.12. HRMS (ESI) calcd for C<sub>21</sub>H<sub>25</sub>NO<sub>2</sub>Na [M+Na]<sup>+</sup> 346.1778, found 346.1779.

**3-methoxy-6a-methyl-6,6a,7,8,9,10-hexahydroisindolo[2,1-a]quinoline-5,11-dione (2ae):**

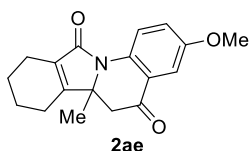

White solid (56.5 mg, 63%, m.p.: 125.3–126.6 °C). <sup>1</sup>H NMR (400 MHz, CDCl<sub>3</sub>) δ 8.22 (d, *J* = 9.0 Hz, 1H), 7.45 (d, *J* = 3.1 Hz, 1H), 7.23 (dd, *J* = 9.1, 3.1 Hz, 1H), 3.84 (s, 3H), 2.83 (d, *J* = 15.9 Hz, 1H), 2.52 (d, *J* = 15.9 Hz, 1H), 2.37–2.20 (m, 4H), 1.88–1.72 (m, 4H), 1.35 (s, 3H); <sup>13</sup>C NMR (100 MHz, CDCl<sub>3</sub>) δ 192.58, 167.95, 159.79, 155.75, 133.49, 131.21, 123.77, 122.66, 122.57, 108.88, 65.44, 55.72, 46.94, 22.05, 21.88, 21.48, 21.38, 20.10. HRMS (ESI) calcd for C<sub>18</sub>H<sub>19</sub>NO<sub>3</sub>Na [M+Na]<sup>+</sup> 320.1257, found 320.1257.

**3-chloro-6a-methyl-6,6a,7,8,9,10-hexahydroisindolo[2,1-a]quinoline-5,11-dione (2af):**

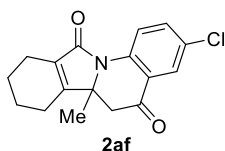

White solid (62.4 mg, 69%, m.p.: 168.6–170.1 °C).  $^1\text{H}$  NMR (400 MHz,  $\text{CDCl}_3$ )  $\delta$  8.29 (d,  $J = 8.8$  Hz, 1H), 7.95 (d,  $J = 2.6$  Hz, 1H), 7.57 (dd,  $J = 8.9, 2.6$  Hz, 1H), 2.85 (d,  $J = 15.9$  Hz, 1H), 2.53 (d,  $J = 15.9$  Hz, 1H), 2.37–2.21 (m, 4H), 1.90–1.73 (m, 4H), 1.35 (s, 3H);  $^{13}\text{C}$  NMR (100 MHz,  $\text{CDCl}_3$ )  $\delta$  191.45, 168.07, 160.48, 137.82, 135.42, 131.13, 129.24, 126.79, 122.88, 122.45, 65.30, 46.60, 21.96, 21.78, 21.59, 21.43, 20.05. HRMS (ESI) calcd for  $\text{C}_{17}\text{H}_{16}\text{ClNO}_2\text{Na}$   $[\text{M}+\text{Na}]^+$  324.0762, found 324.0765.

**methyl 6a-methyl-5,11-dioxo-5,6,6a,7,8,9,10,11-octahydroisoindolo[2,1-a]quinoline-3-carboxylate (2ag):**

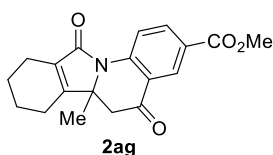

White solid (47.7 mg, 49%, m.p.: 172.4–173.5 °C).  $^1\text{H}$  NMR (400 MHz,  $\text{CDCl}_3$ )  $\delta$  8.67 (br, 1H), 8.43 (dd,  $J = 8.7, 1.6$  Hz, 1H), 8.27 (m, 1H), 3.93 (s, 3H), 2.89 (d,  $J = 15.8$  Hz, 1H), 2.57 (d,  $J = 15.8$  Hz, 1H), 2.38–2.23 (m, 4H), 1.87–1.76 (m, 4H), 1.37 (s, 3H);  $^{13}\text{C}$  NMR (100 MHz,  $\text{CDCl}_3$ )  $\delta$  191.66, 168.28, 166.06, 161.01, 142.65, 136.30, 131.11, 129.26, 125.13, 121.38, 120.57, 65.36, 52.33, 46.49, 21.93, 21.76, 21.48, 20.04. HRMS (ESI) calcd for  $\text{C}_{19}\text{H}_{19}\text{NO}_4\text{Na}$   $[\text{M}+\text{Na}]^+$  348.1206, found 348.1207.

**6a-methyl-6a,7,8,9,10,11-hexahydro-5H-cyclohepta[3,4]pyrrolo[1,2-a]quinoline-5,12(6H)-dione (2ah):**

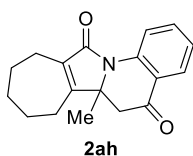

White solid (59.1 mg, 70%, m.p.: 151.5–153.2 °C).  $^1\text{H}$  NMR (400 MHz,  $\text{CDCl}_3$ )  $\delta$  8.33 (d,  $J = 8.3$  Hz, 1H), 7.99 (d,  $J = 7.9, 1.7$  Hz, 1H), 7.65–7.61 (m, 1H), 7.20–7.16 (m, 1H), 2.87 (d,  $J = 15.8$  Hz, 1H), 2.59–2.37 (m, 5H), 1.90–1.58 (m, 6H), 1.35 (s, 3H);  $^{13}\text{C}$  NMR (100 MHz,  $\text{CDCl}_3$ )  $\delta$  192.6, 168.4, 162.7, 139.5, 135.6, 134.3, 127.1, 123.6, 121.9, 120.8, 65.1, 46.3, 31.1, 27.2, 27.0, 26.8, 24.5, 21.1. HRMS (ESI) calcd for  $\text{C}_{18}\text{H}_{19}\text{NO}_2\text{Na}$   $[\text{M}+\text{Na}]^+$  304.1308, found 304.1309.

**3-butyl-3a-methyl-3a,4-dihydropyrrolo[1,2-a]quinoline-1,5-dione (2aj):**

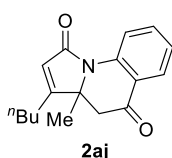

White solid (14.3 mg, 18%, m.p.: 103.3–104.9 °C).  $^1\text{H}$  NMR (400 MHz,  $\text{CDCl}_3$ )  $\delta$  8.28 (d,  $J = 8.3$  Hz, 1H), 8.01 (dd,  $J = 7.9, 1.6$  Hz, 1H), 7.66–7.62 (m, 1H), 7.22–7.18 (m, 1H), 6.00 (t,  $J = 1.7$  Hz, 1H), 2.88 (d,  $J = 15.8$  Hz, 1H), 2.59 (d,  $J = 15.8$  Hz, 1H), 2.41–2.23 (m, 2H), 1.70–1.63 (m, 2H), 1.50–1.41 (m, 2H), 1.40 (s, 3H), 0.98 (t,  $J = 7.4$  Hz, 3H);  $^{13}\text{C}$  NMR (100 MHz,  $\text{CDCl}_3$ )  $\delta$  192.22, 169.76, 167.92, 139.23, 135.76, 127.29, 123.90, 121.91, 121.09, 120.74, 67.29, 46.85, 28.93, 26.34, 22.55, 21.79, 13.95. HRMS (ESI) calcd for  $\text{C}_{17}\text{H}_{19}\text{NO}_2\text{Na}$   $[\text{M}+\text{Na}]^+$  292.1308, found 292.1315.



## 7. X-Ray crystal structures of product 2g

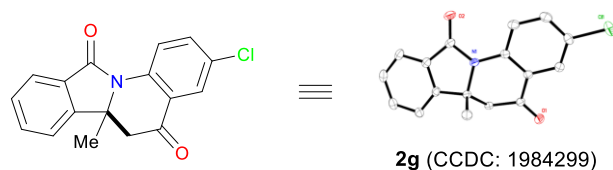

|                                             |                                                   |
|---------------------------------------------|---------------------------------------------------|
| Empirical formula                           | C <sub>17</sub> H <sub>12</sub> ClNO <sub>2</sub> |
| Formula weight                              | 297.73                                            |
| Temperature/K                               | 180(2)                                            |
| Crystal system                              | monoclinic                                        |
| Space group                                 | P 21/n                                            |
| a/Å                                         | 7.0426(6)                                         |
| b/Å                                         | 10.7671(10)                                       |
| c/Å                                         | 18.0428(16)                                       |
| α/°                                         | 90                                                |
| β/°                                         | 98.613(3)                                         |
| γ/°                                         | 90                                                |
| Volume/Å <sup>3</sup>                       | 1352.7(2)                                         |
| Z                                           | 4                                                 |
| ρ <sub>calc</sub> /cm <sup>3</sup>          | 1.462                                             |
| μ/mm <sup>-1</sup>                          | 0.286                                             |
| F(000)                                      | 616.0                                             |
| Crystal size/mm <sup>3</sup>                | 0.20 × 0.15 × 0.15                                |
| Radiation                                   | MoKα                                              |
| 2θ range for data collection/°              | 2.966 to 28.383                                   |
| Index ranges                                | -9 ≤ h ≤ 9, -14 ≤ k ≤ 14, -24 ≤ l ≤ 24            |
| Reflections collected                       | 19441                                             |
| Independent reflections                     | 3402 [R(int) = 0.0390]                            |
| Data/restraints/parameters                  | 3402/0/190                                        |
| Goodness-of-fit on F <sup>2</sup>           | 0.816                                             |
| Final R indexes [I ≥ 2σ (I)]                | R <sub>1</sub> = 0.0435, wR <sub>2</sub> = 0.1147 |
| Final R indexes [all data]                  | R <sub>1</sub> = 0.0536, wR <sub>2</sub> = 0.1259 |
| Largest diff. peak/hole / e Å <sup>-3</sup> | 0.372/-0.261                                      |

## 8. References

1. (a) Boulahjar, R.; Ouach, A.; Matteo, C.; Bourg, S.; Ravache, M.; Guevel, R.L.; Marionneau, S.; Oullier, T.; Lozach, O.; Meijer, L.; Guguen-Guillouzo, C.; Lazar, S.; Akssira, M.; Troin, Y.; Guillaumet, G.; Routier, S. *J. Med. Chem.* **2012**, *55*, 9589; (b) Yada, A.; Okajima, S.; Murakami, M. *J. Am. Chem. Soc.* **2015**, *137*, 8708-8711.
2. (a) Trost, B. M.; Xu, J.; Schmidt, T. *J. Am. Chem. Soc.* **2009**, *131*, 18343-18357; (b) Trost, B. M.; Koller, R.; Schäffner, B. *Angew. Chem. Int. Ed.* **2012**, *51*, 8290-8293.

## 9. Copies of NMR spectra

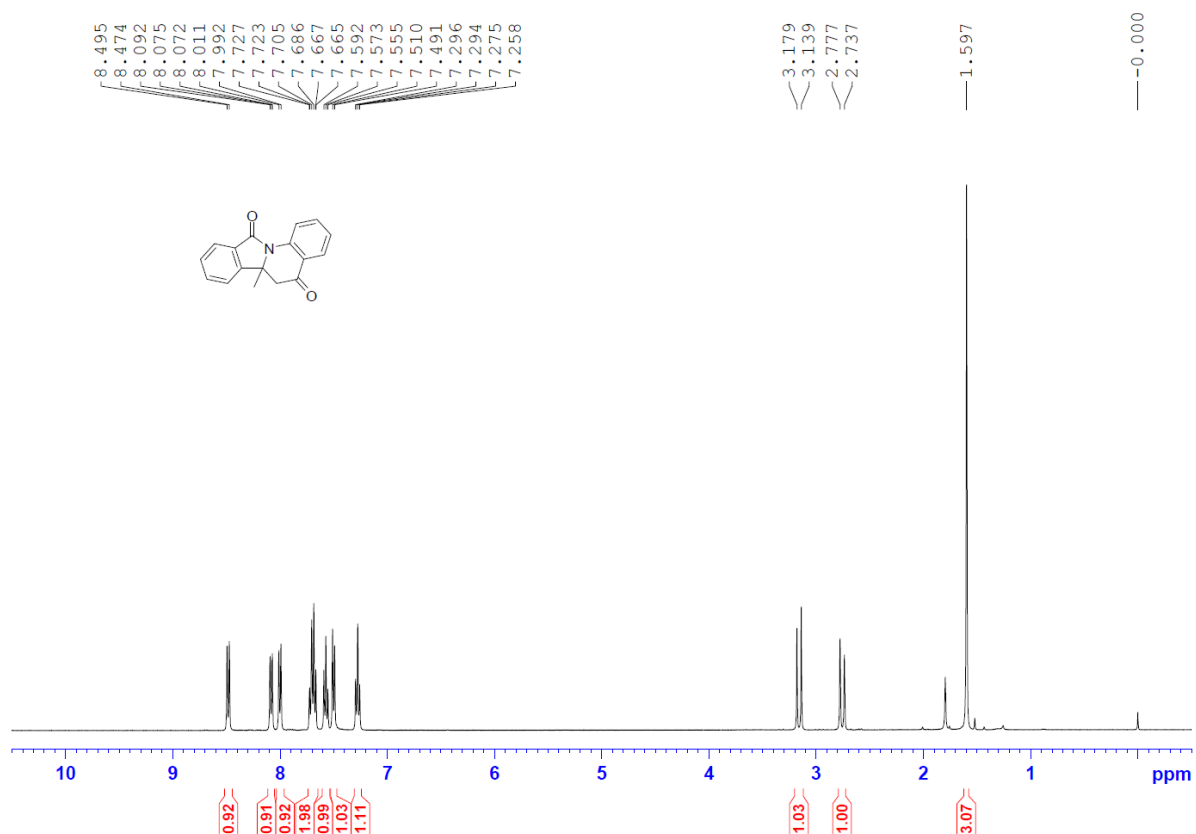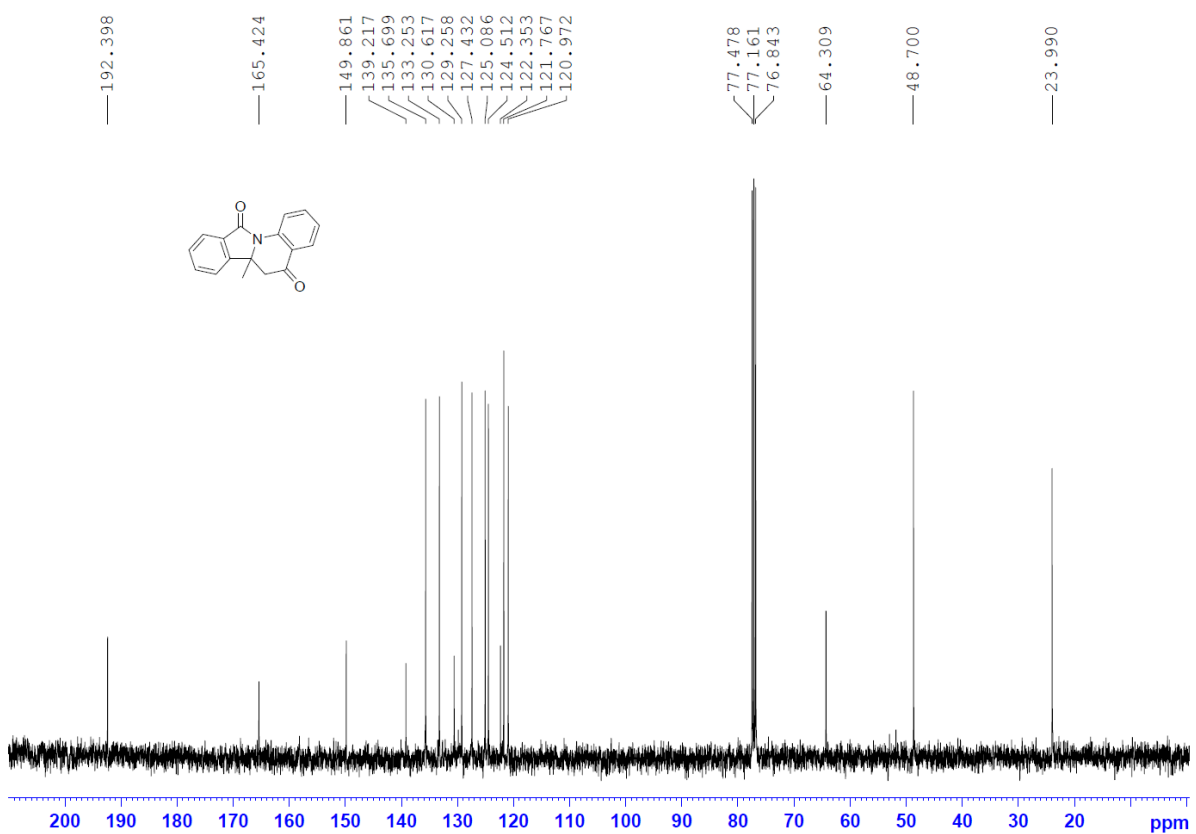

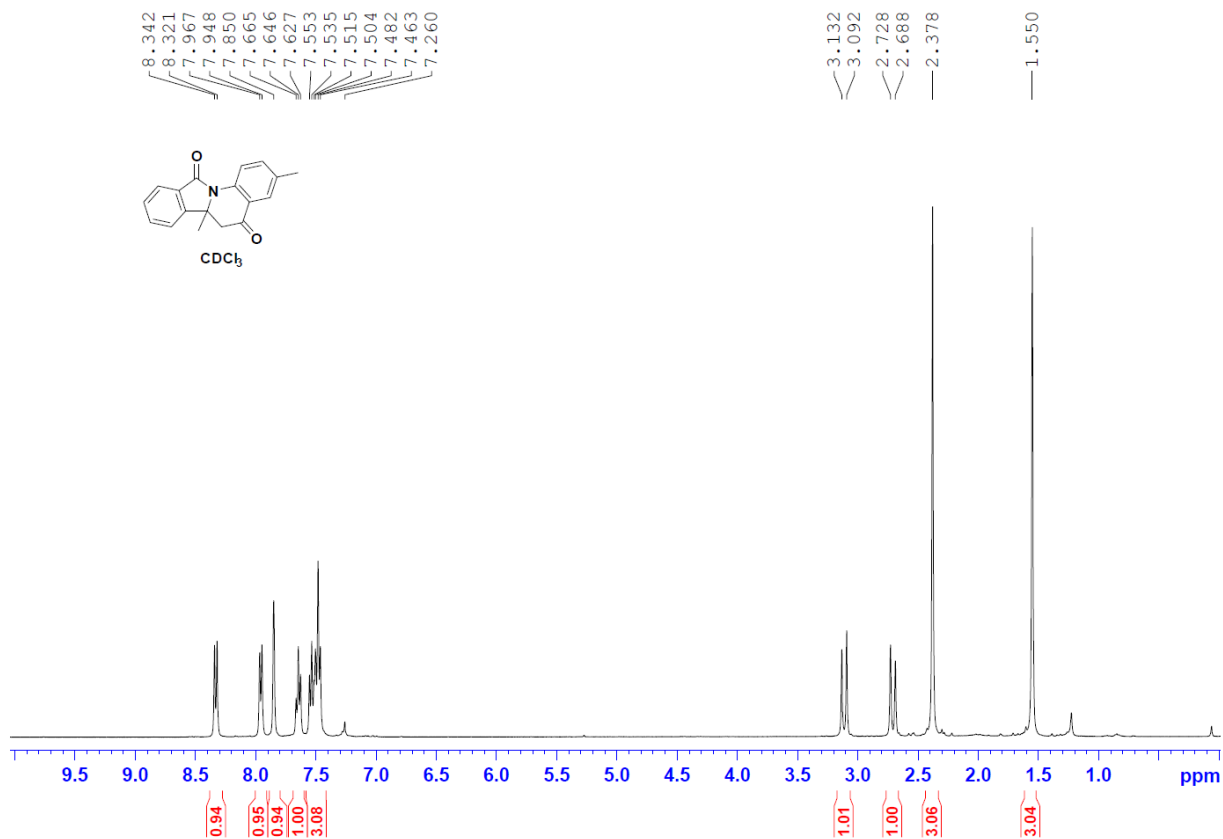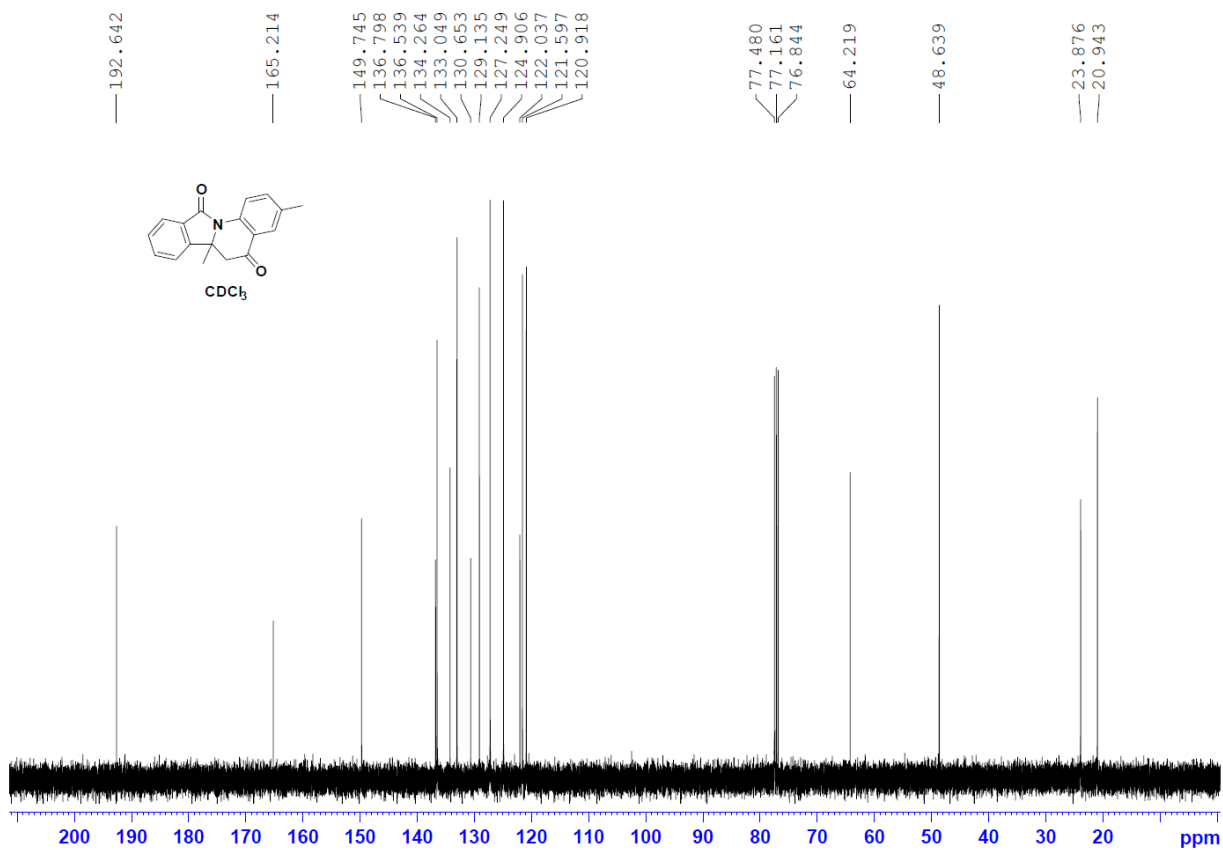

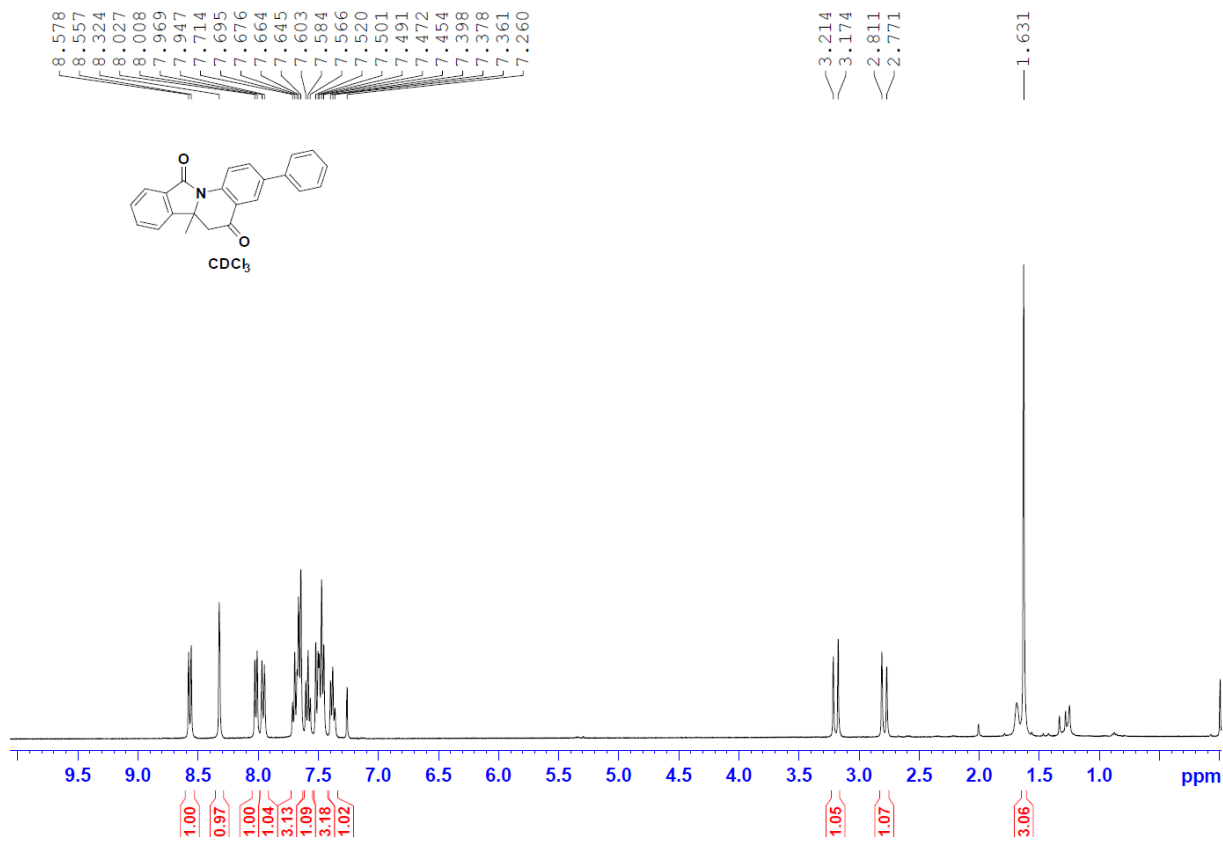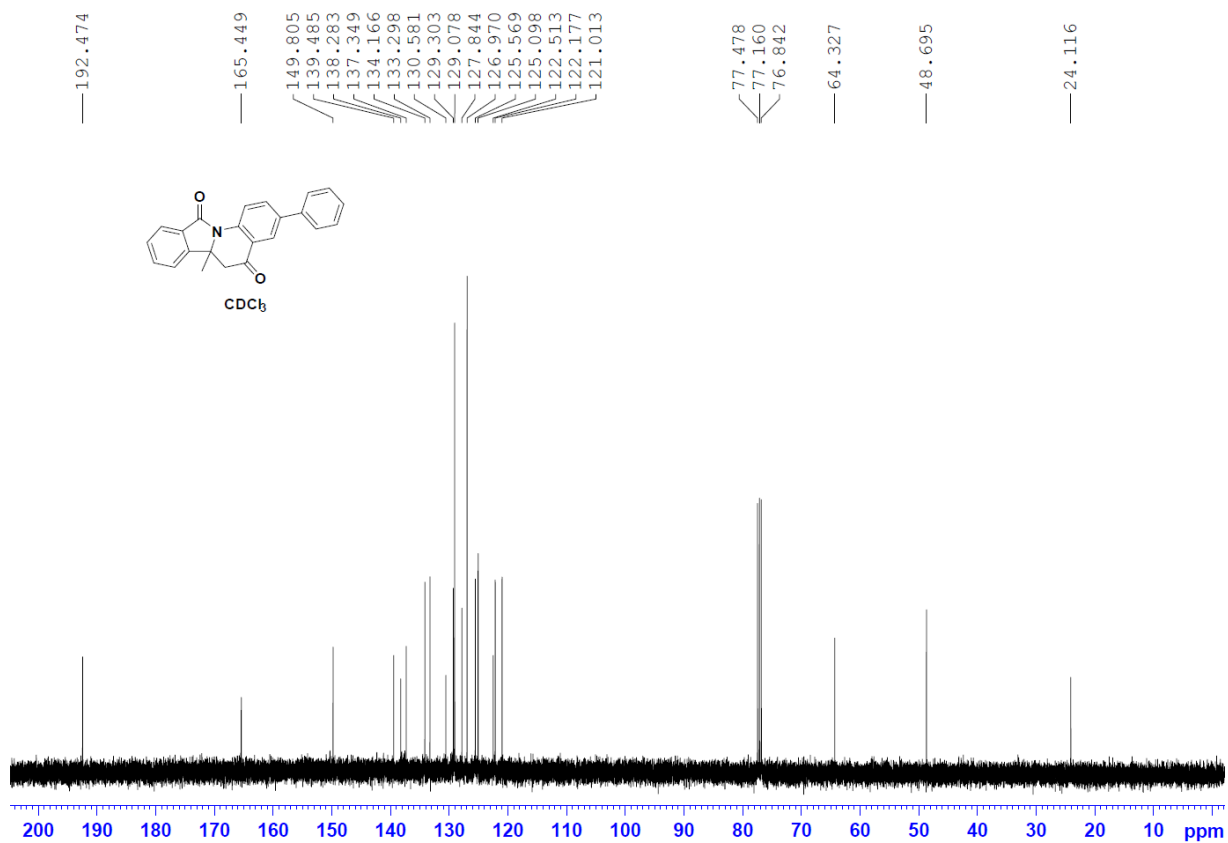

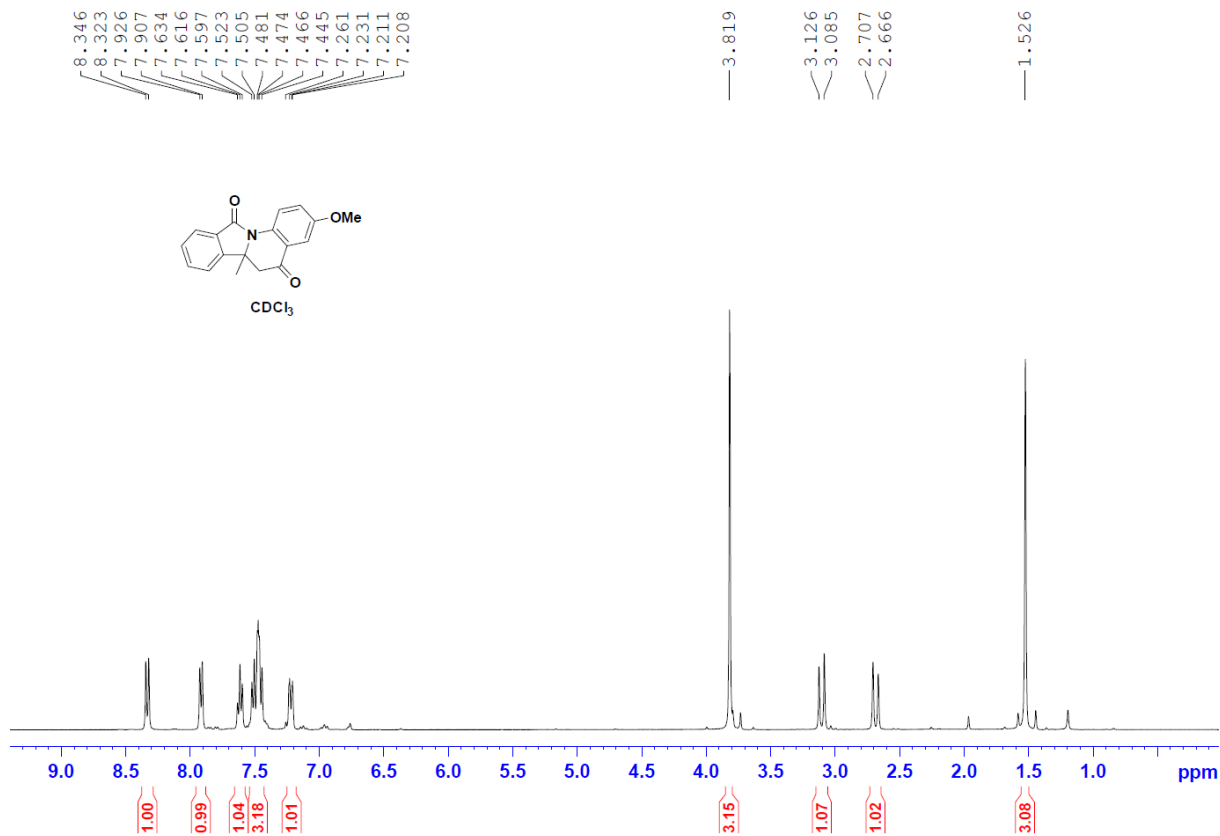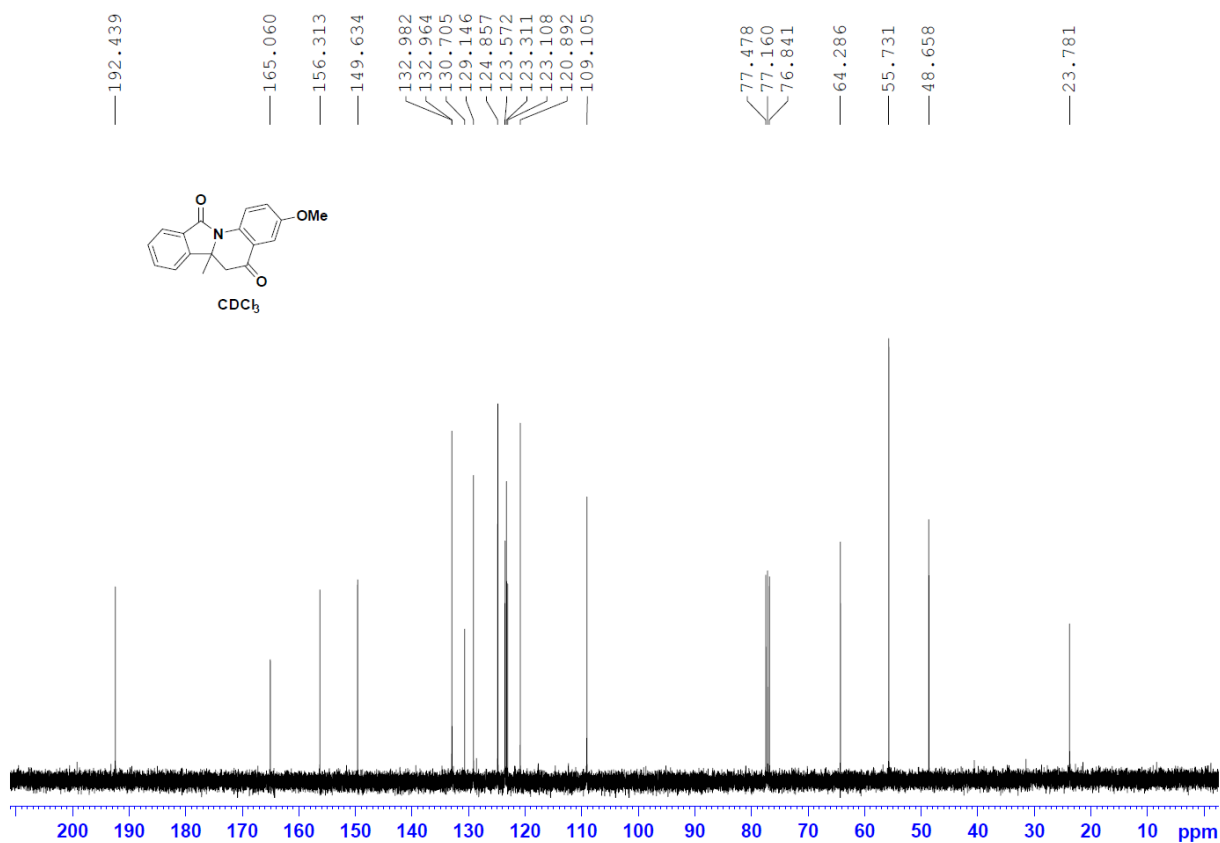

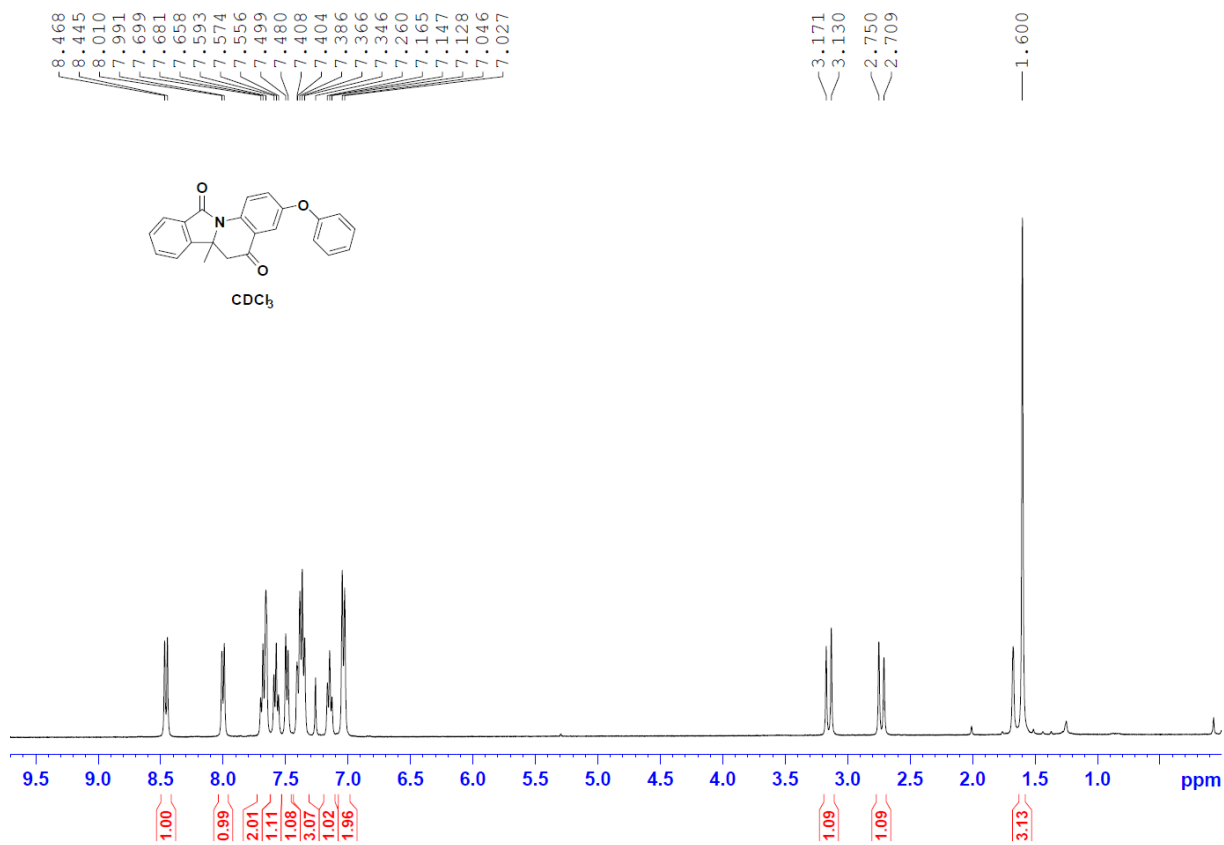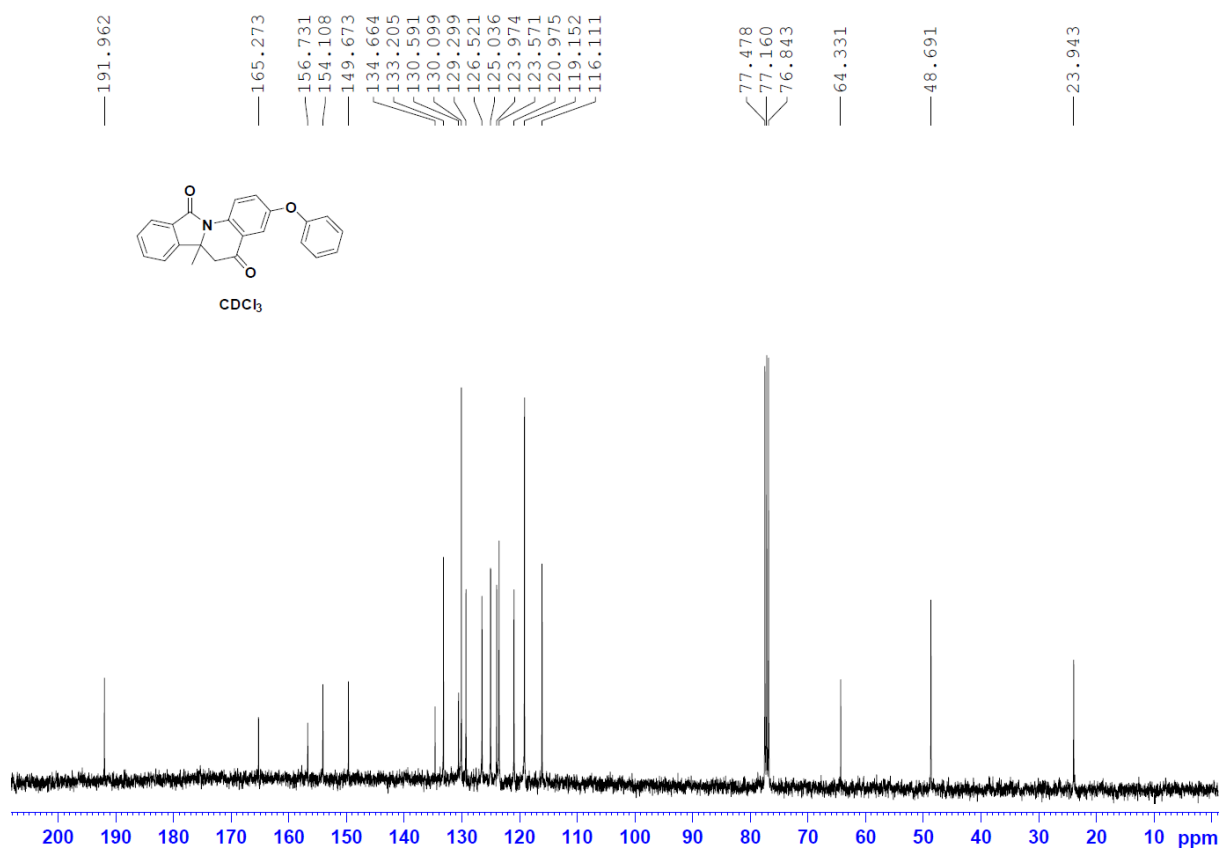

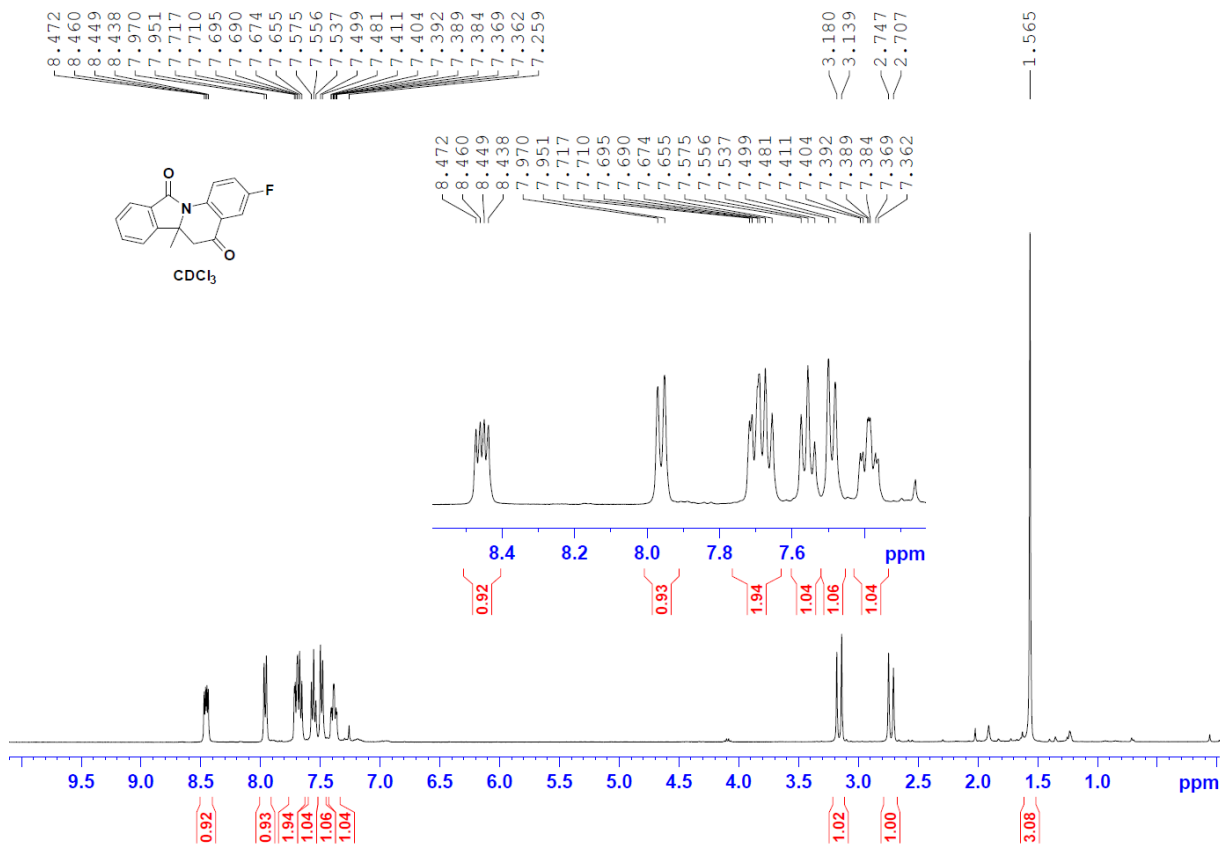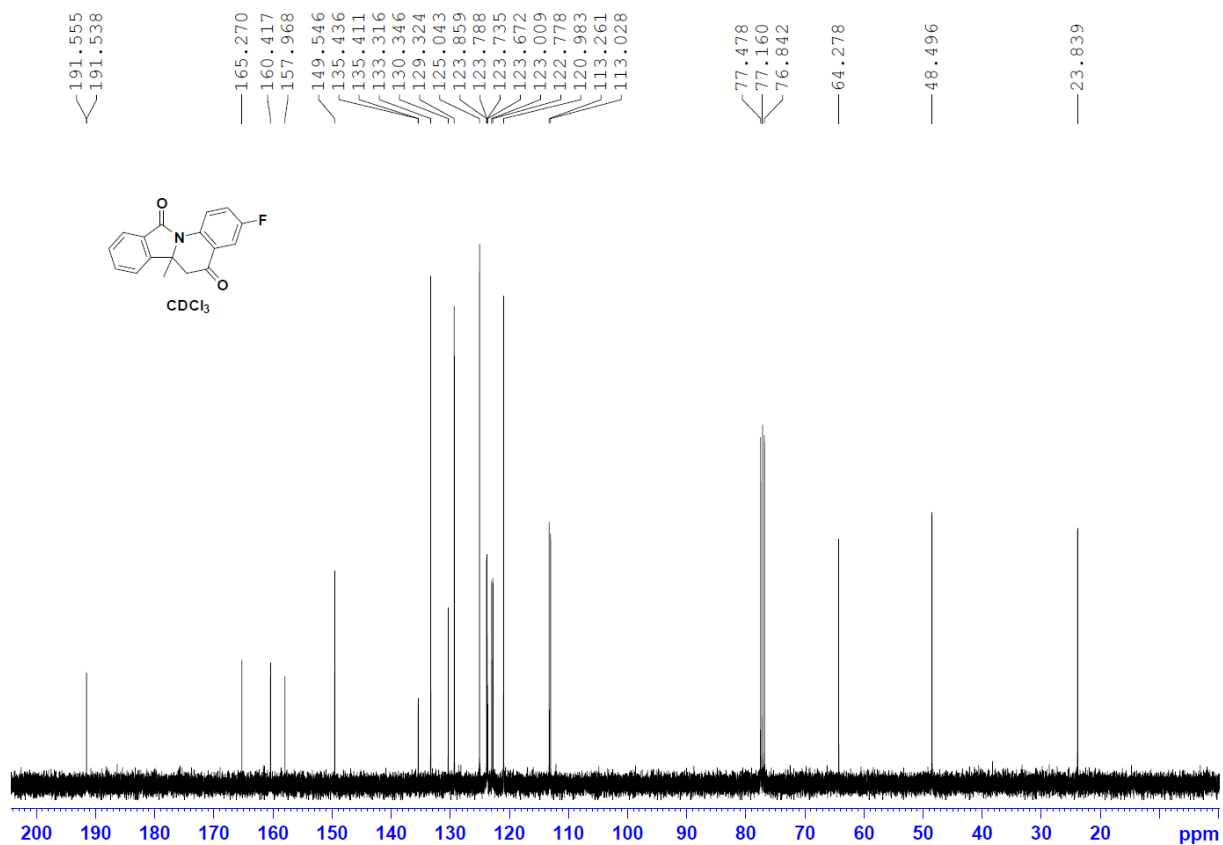



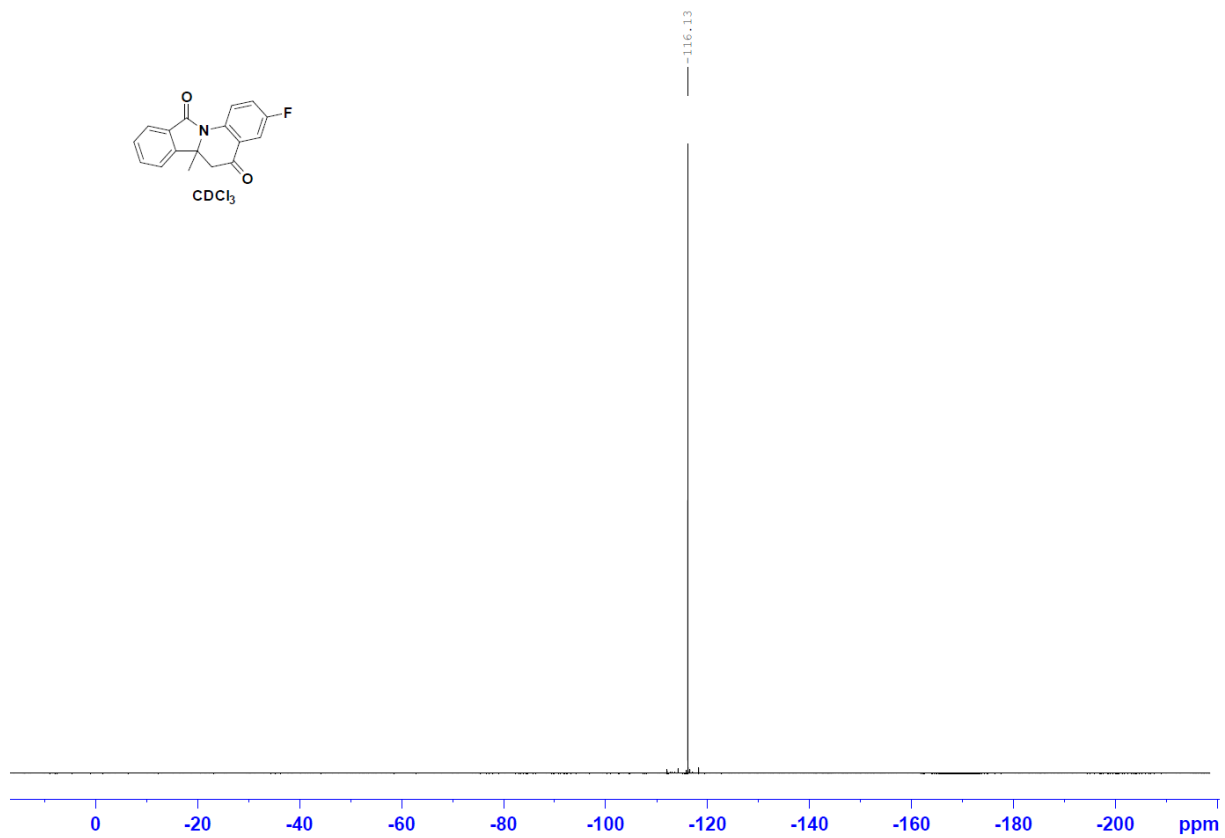

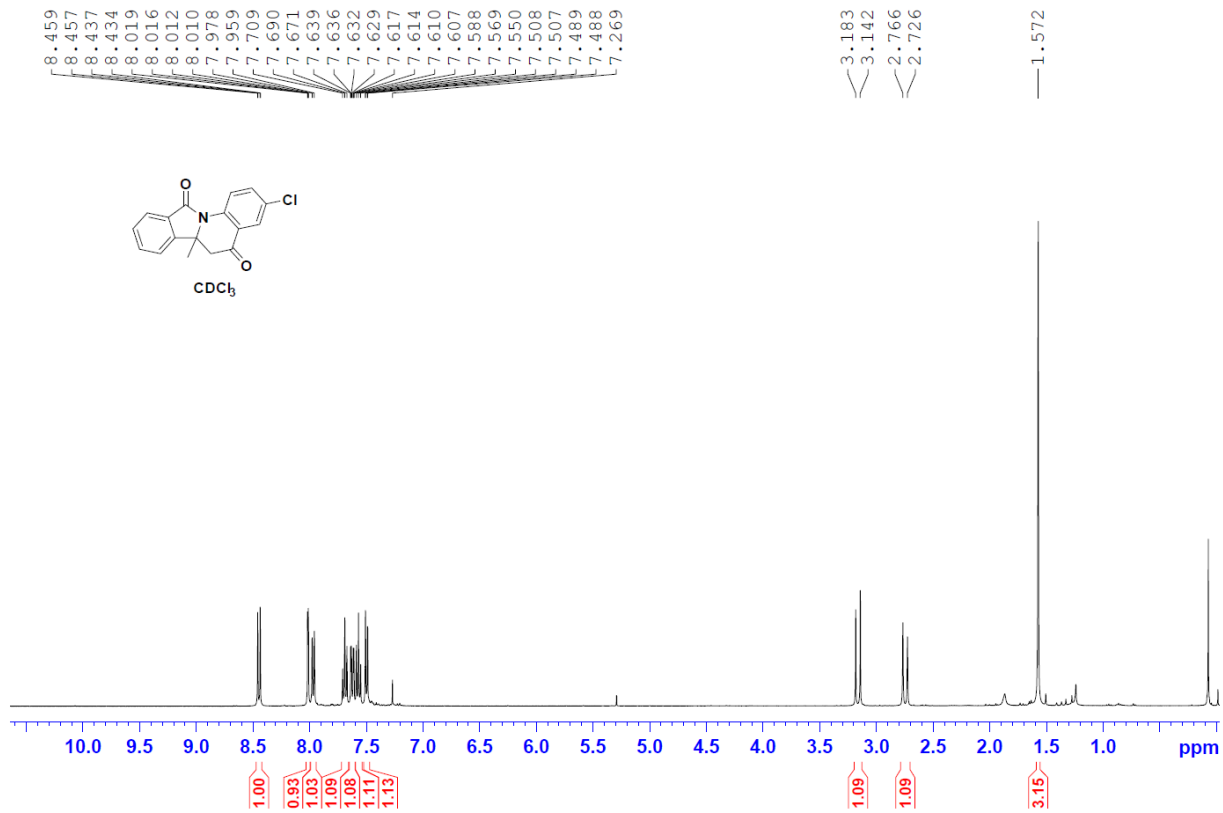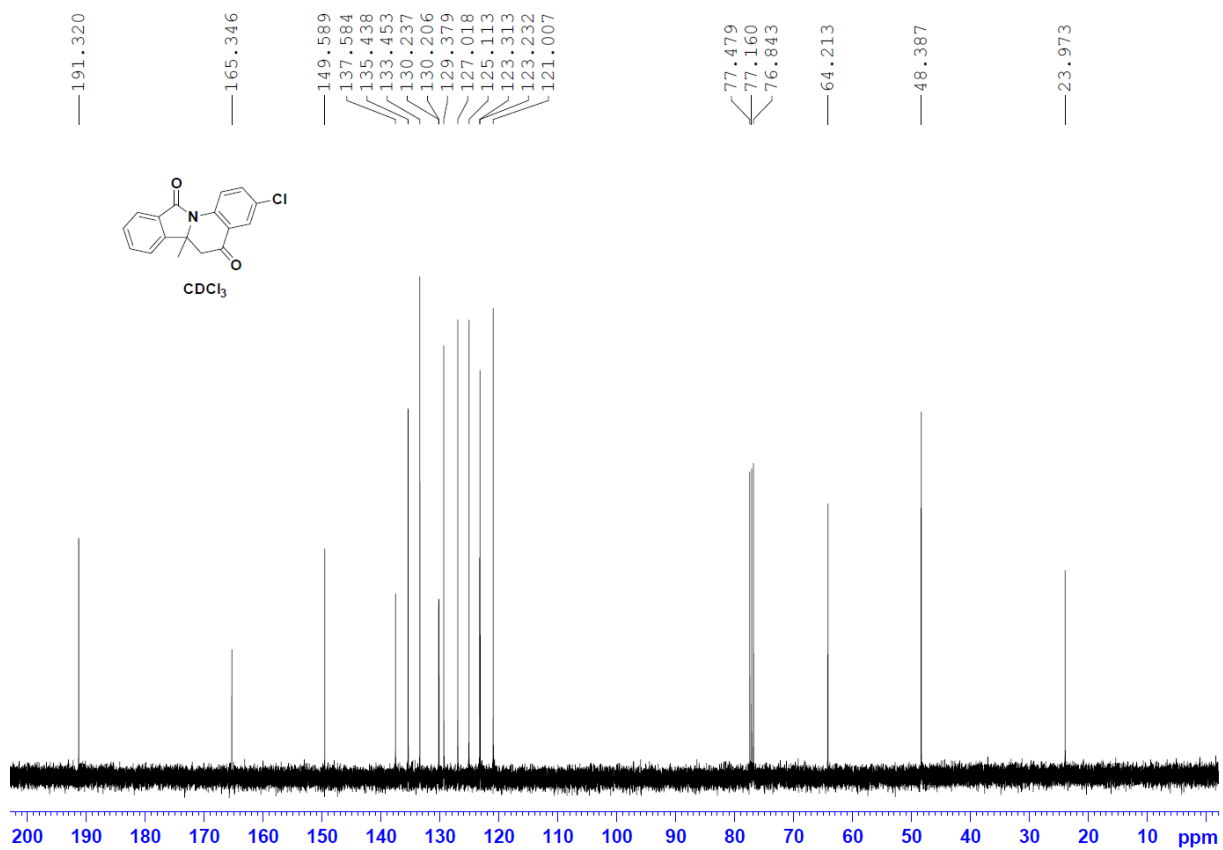

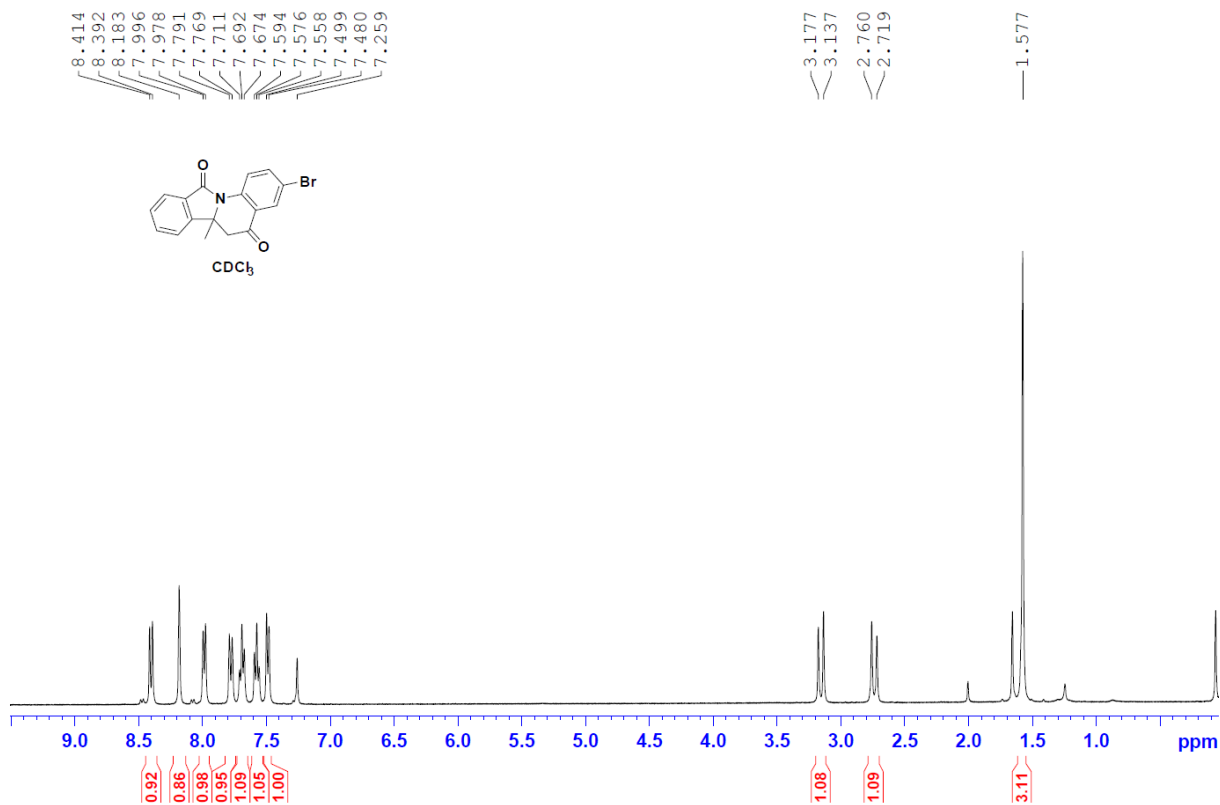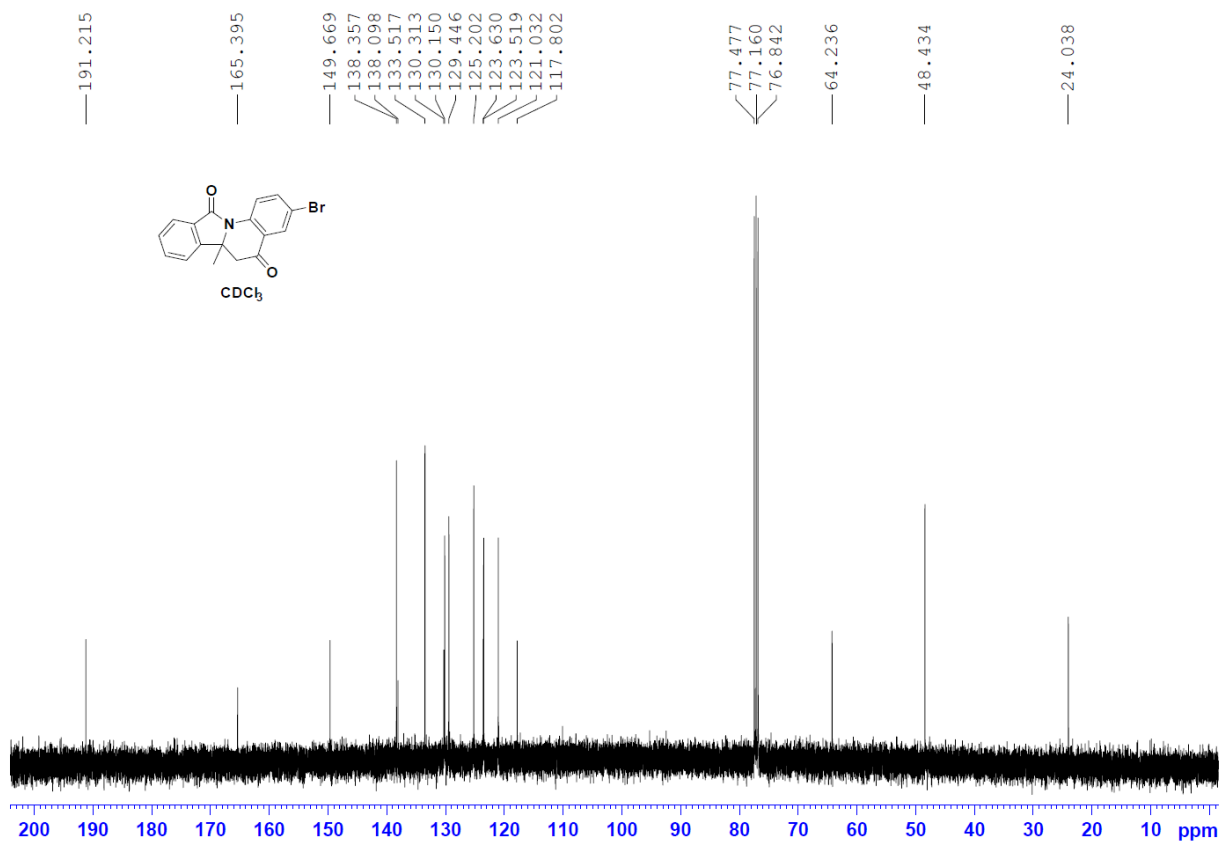

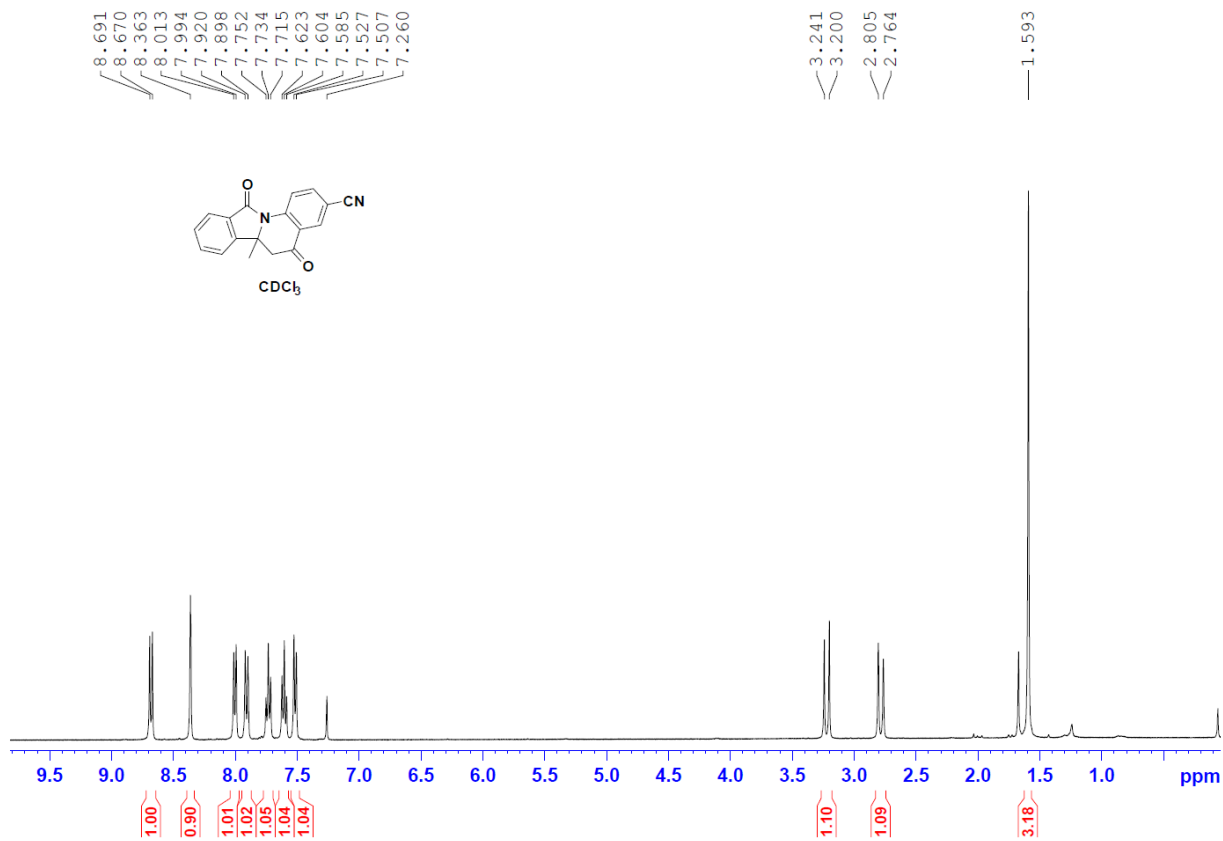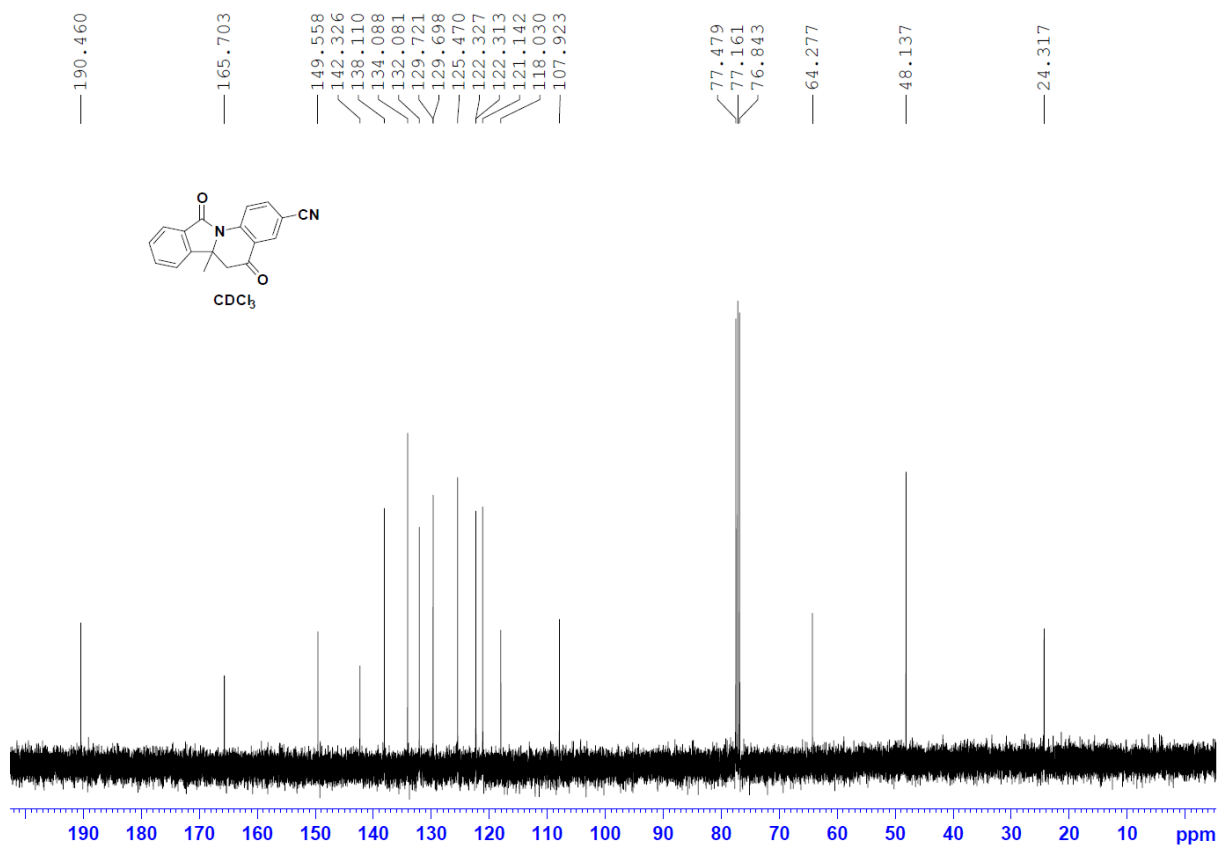

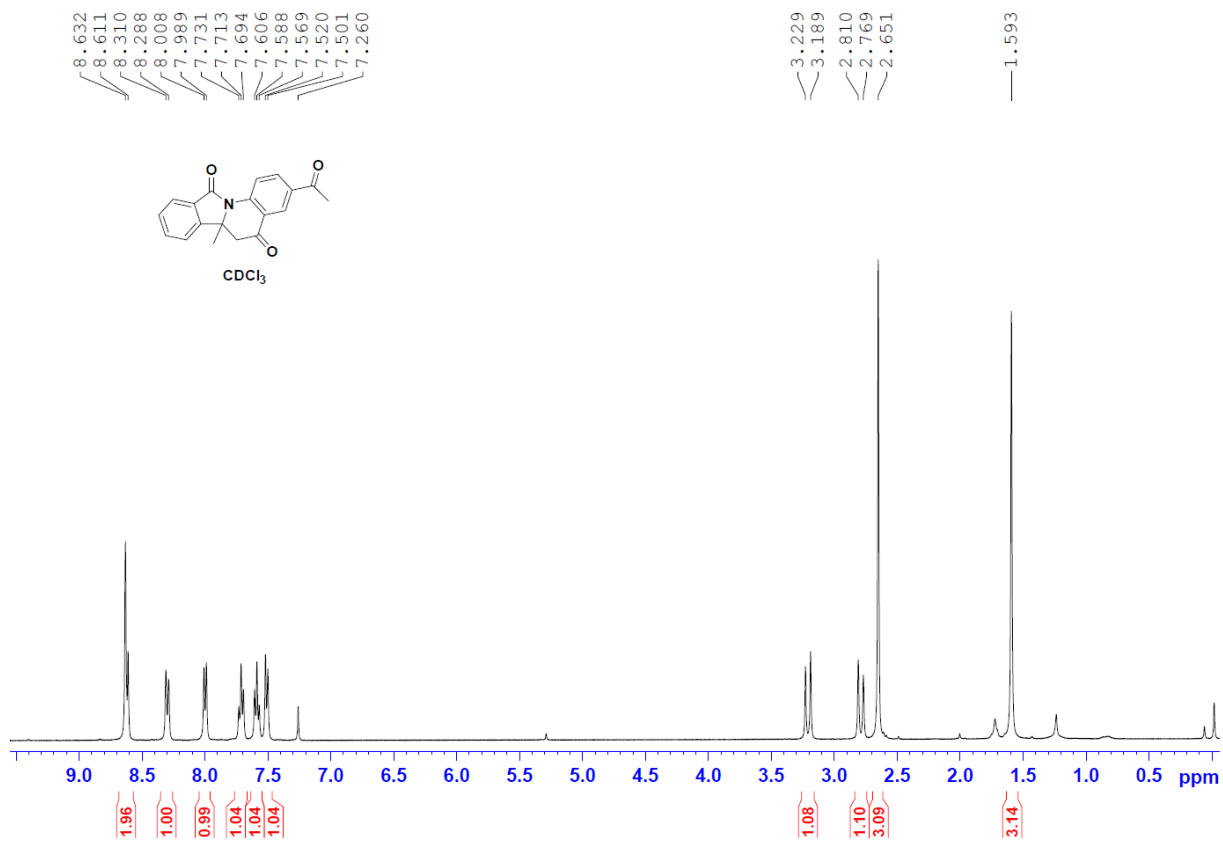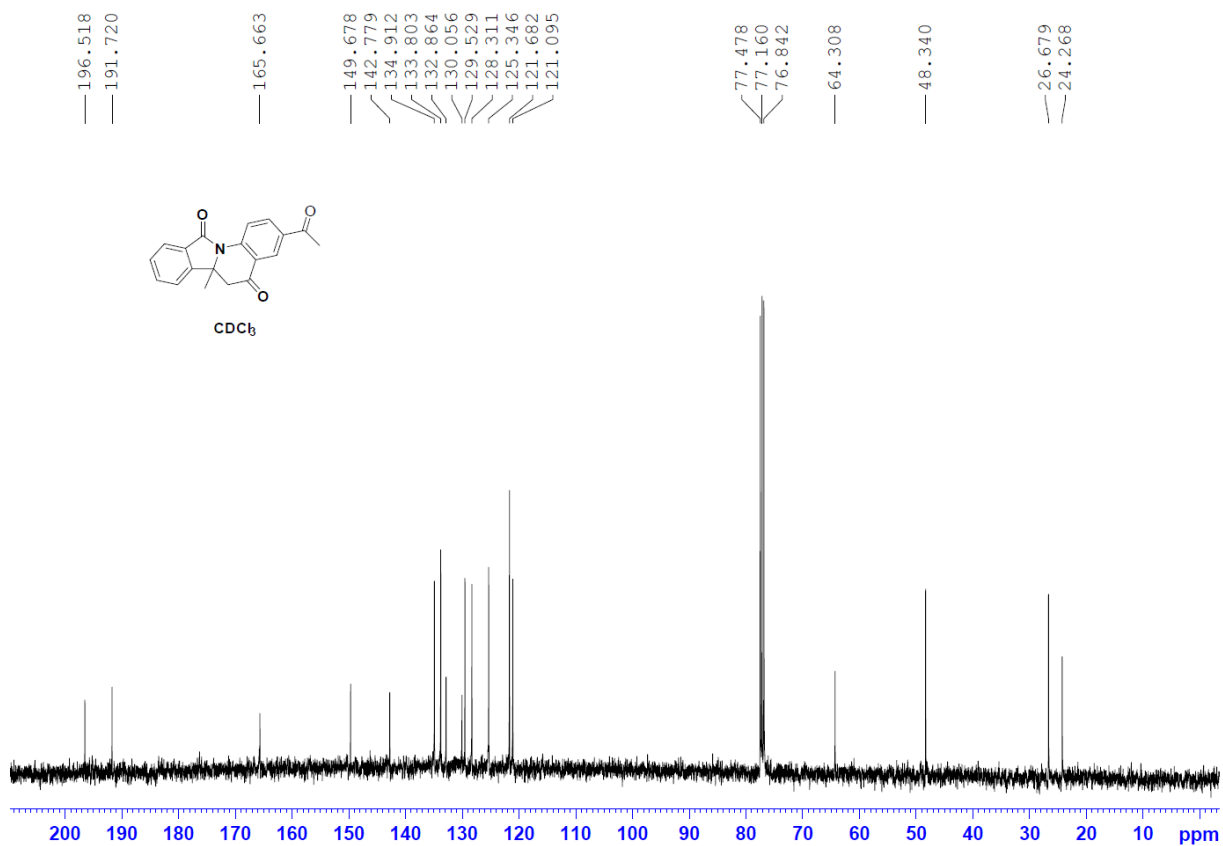

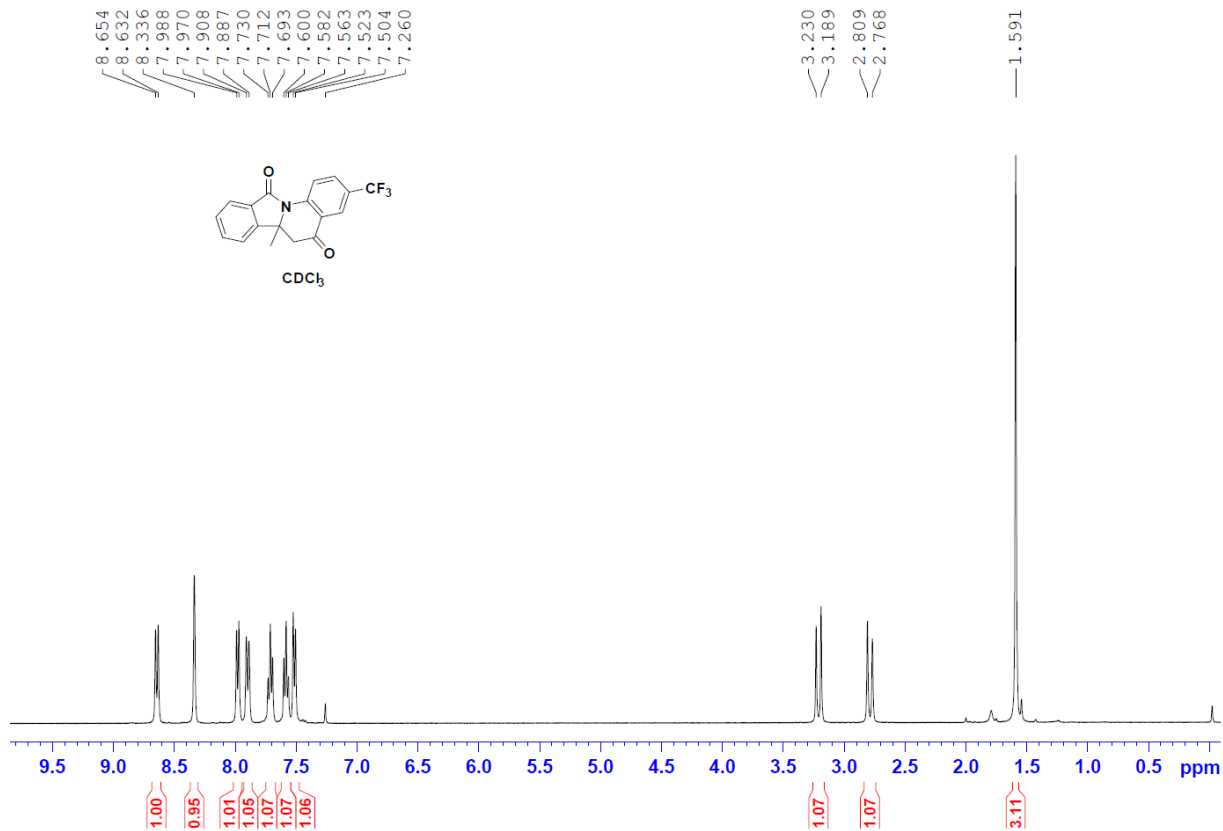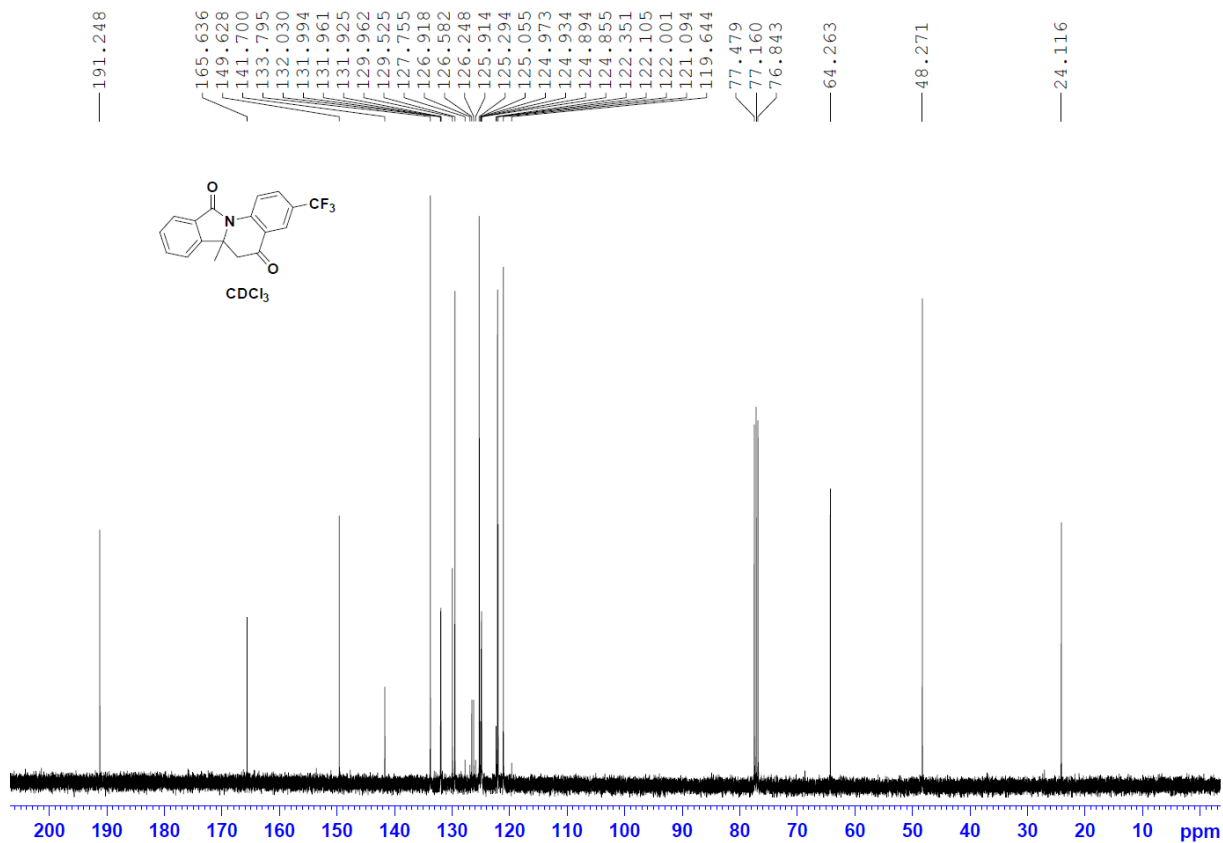

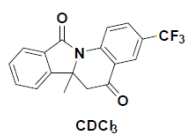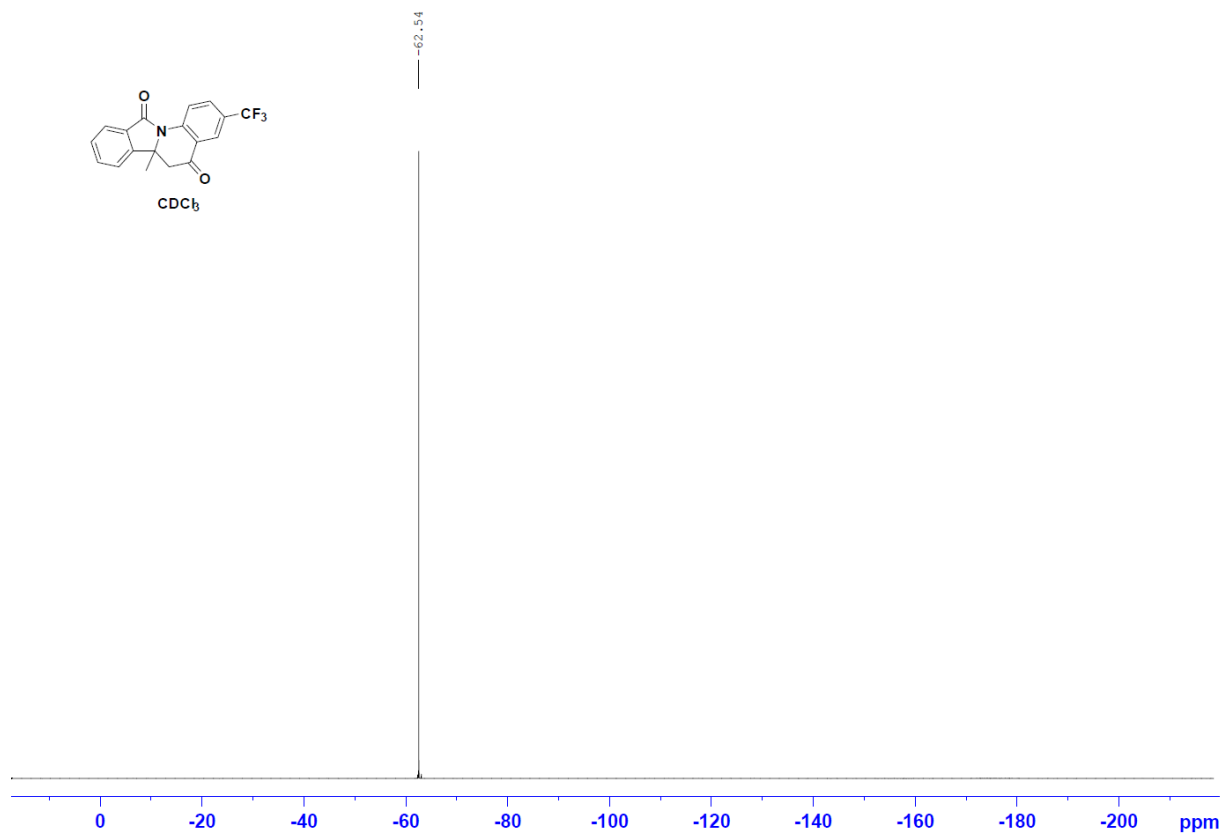

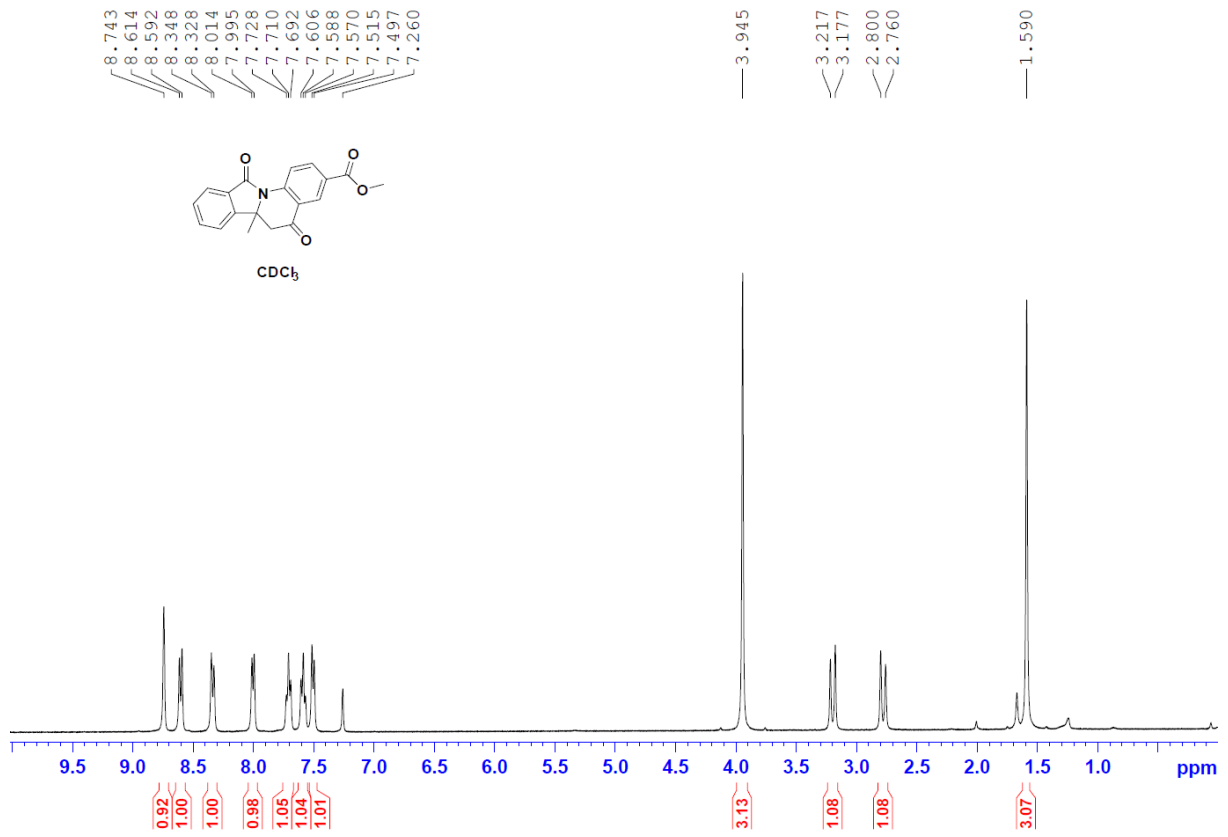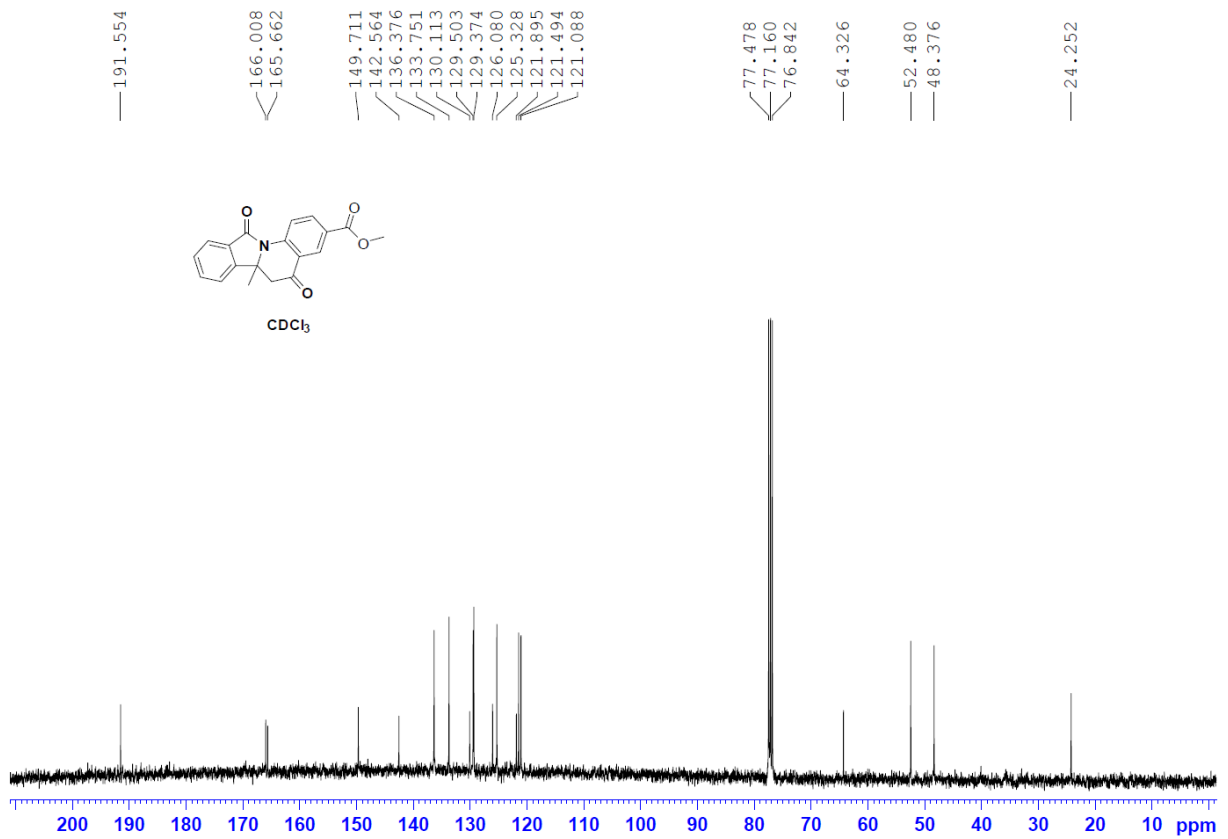



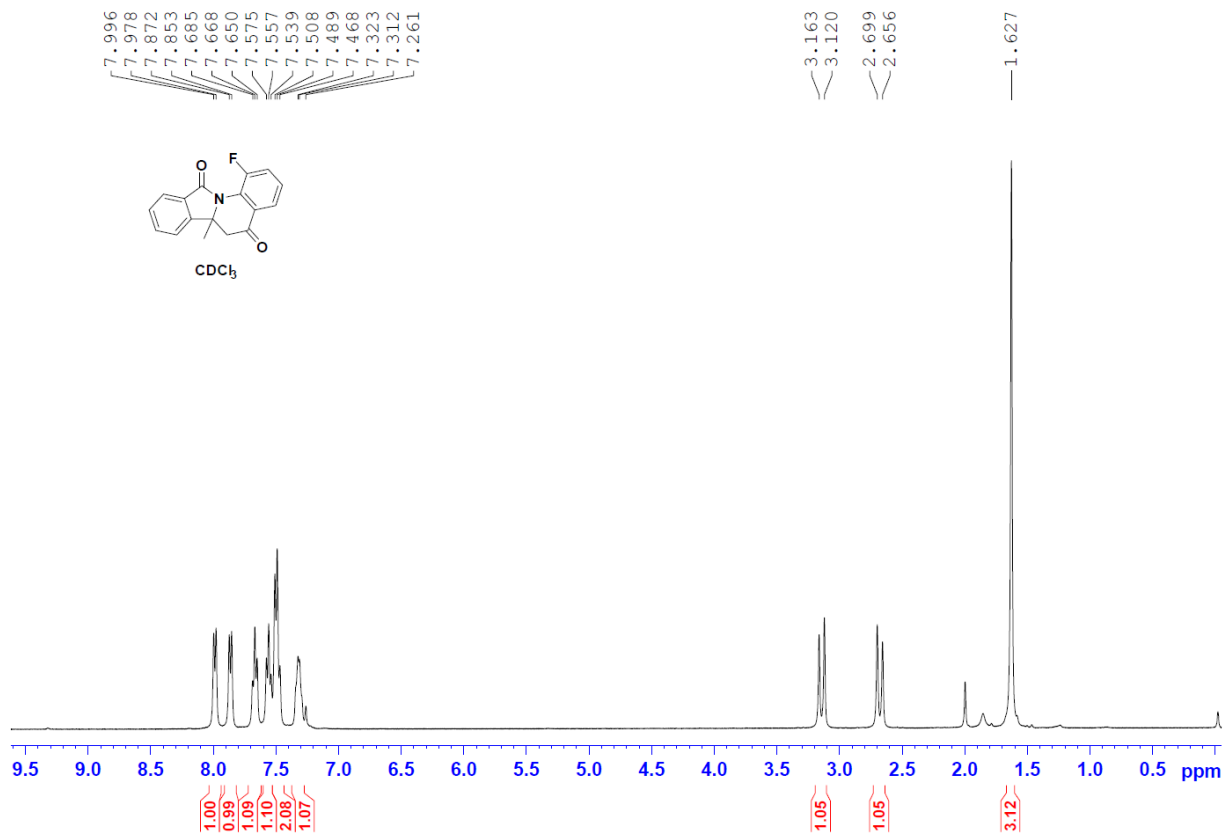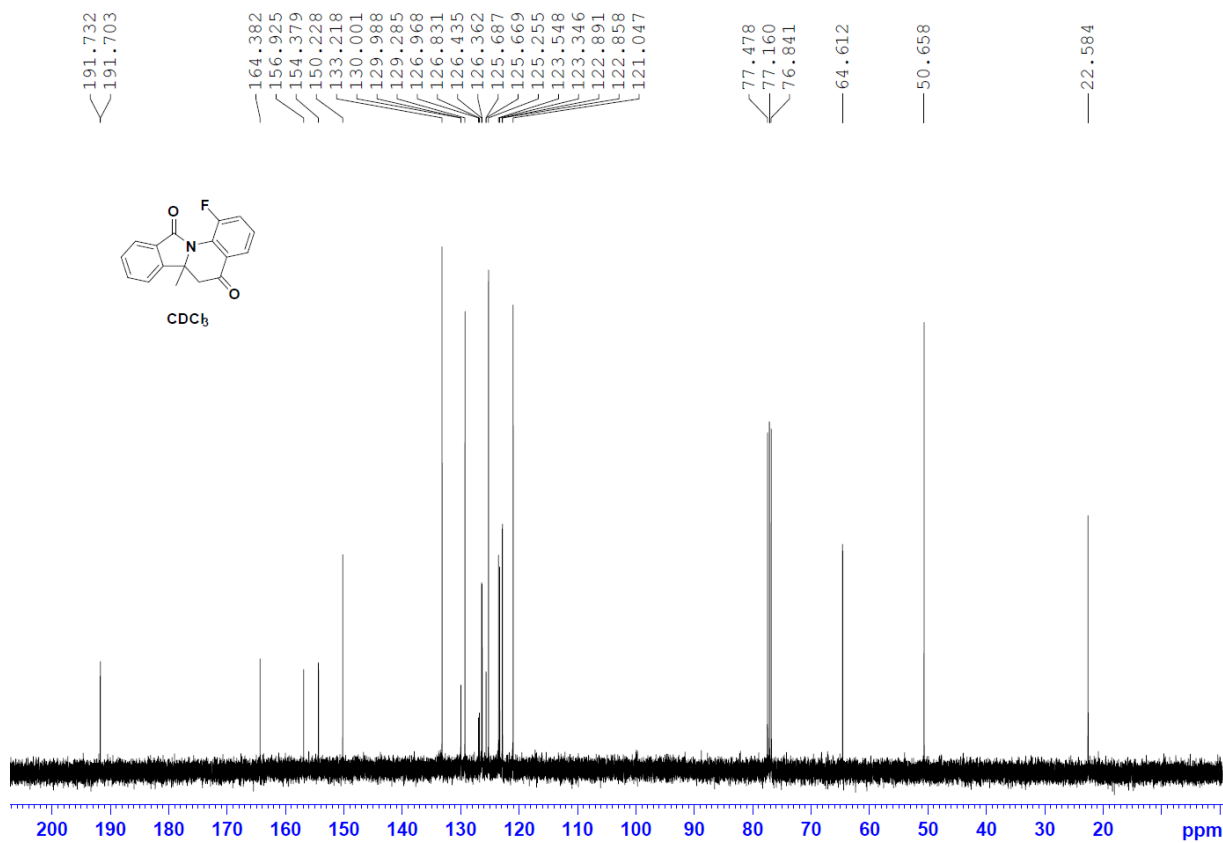

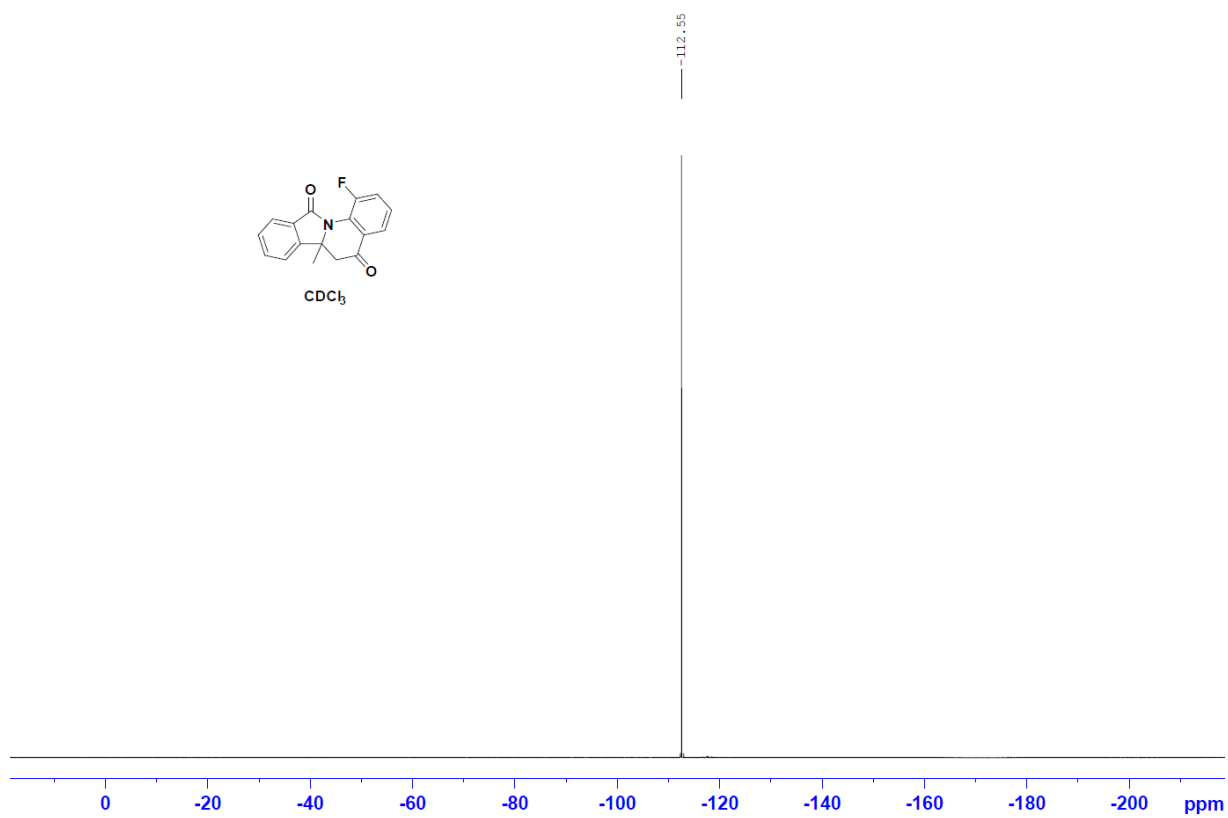

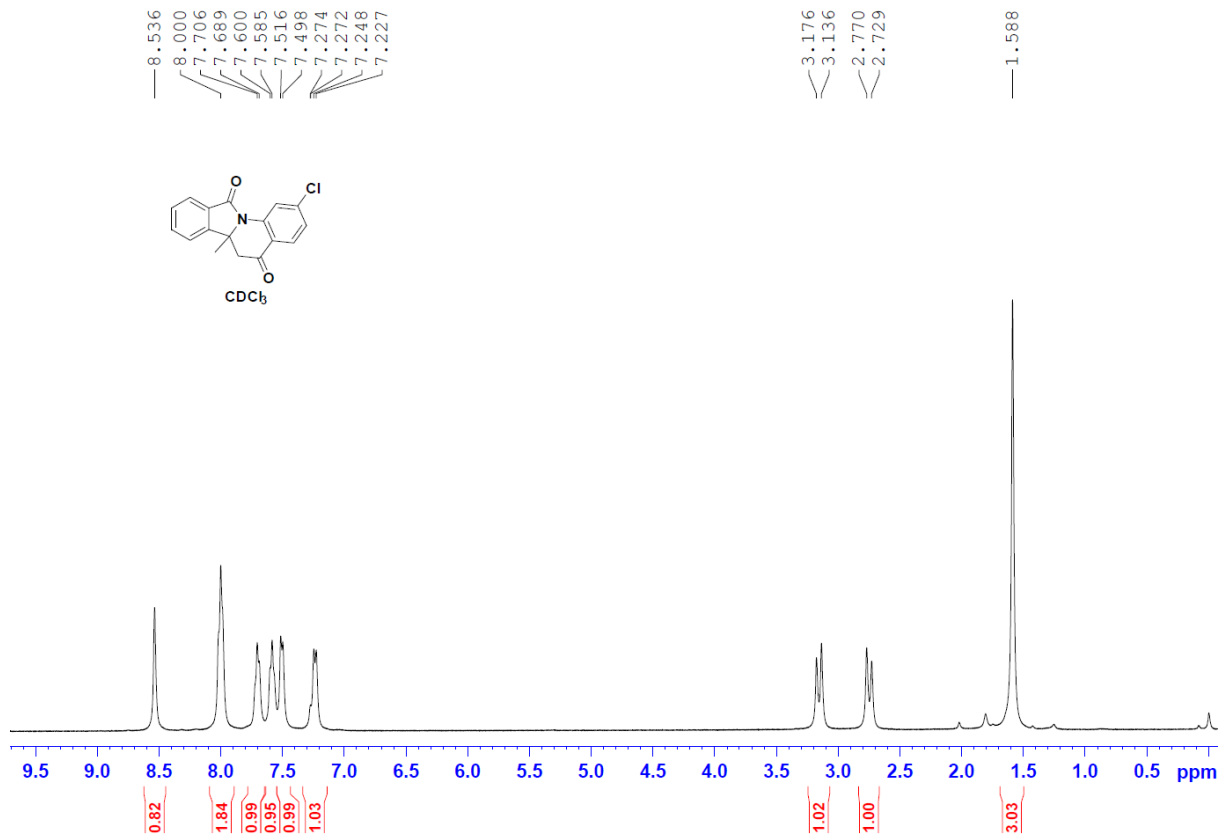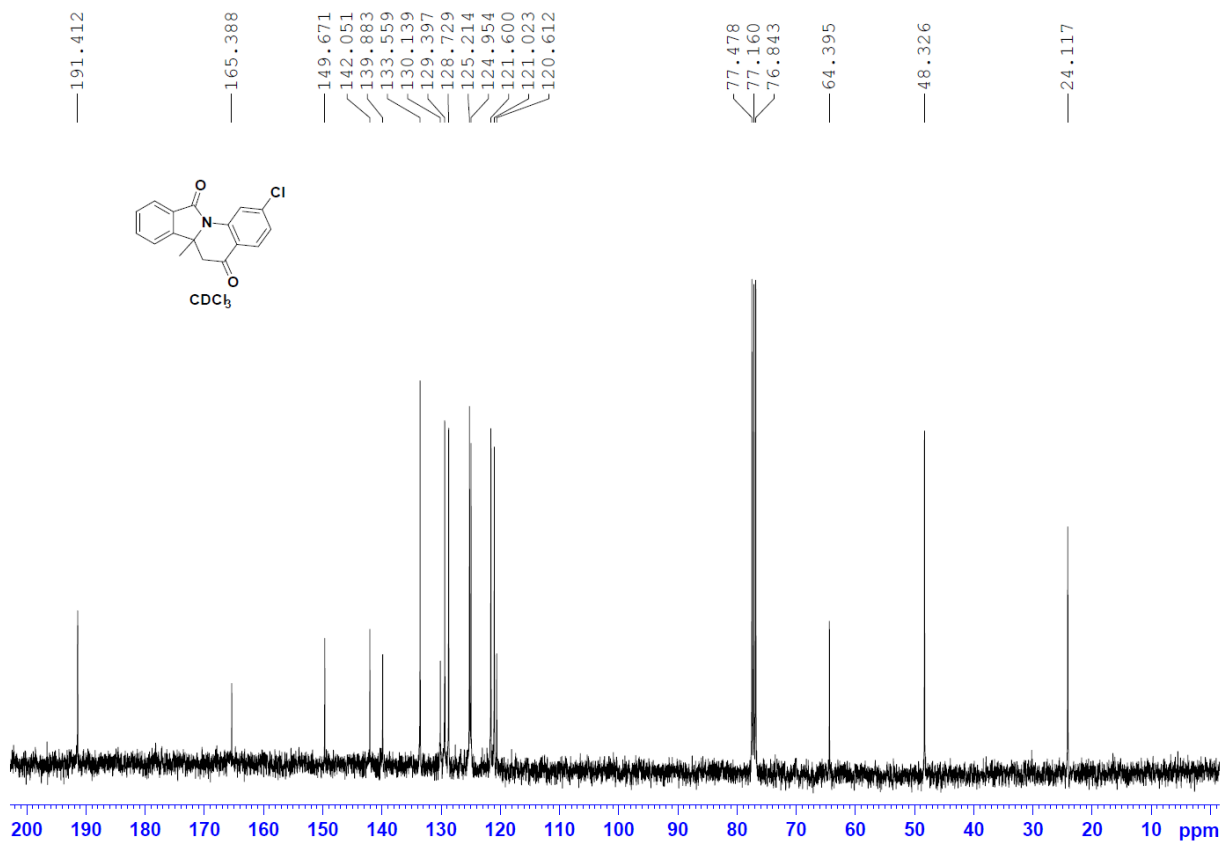

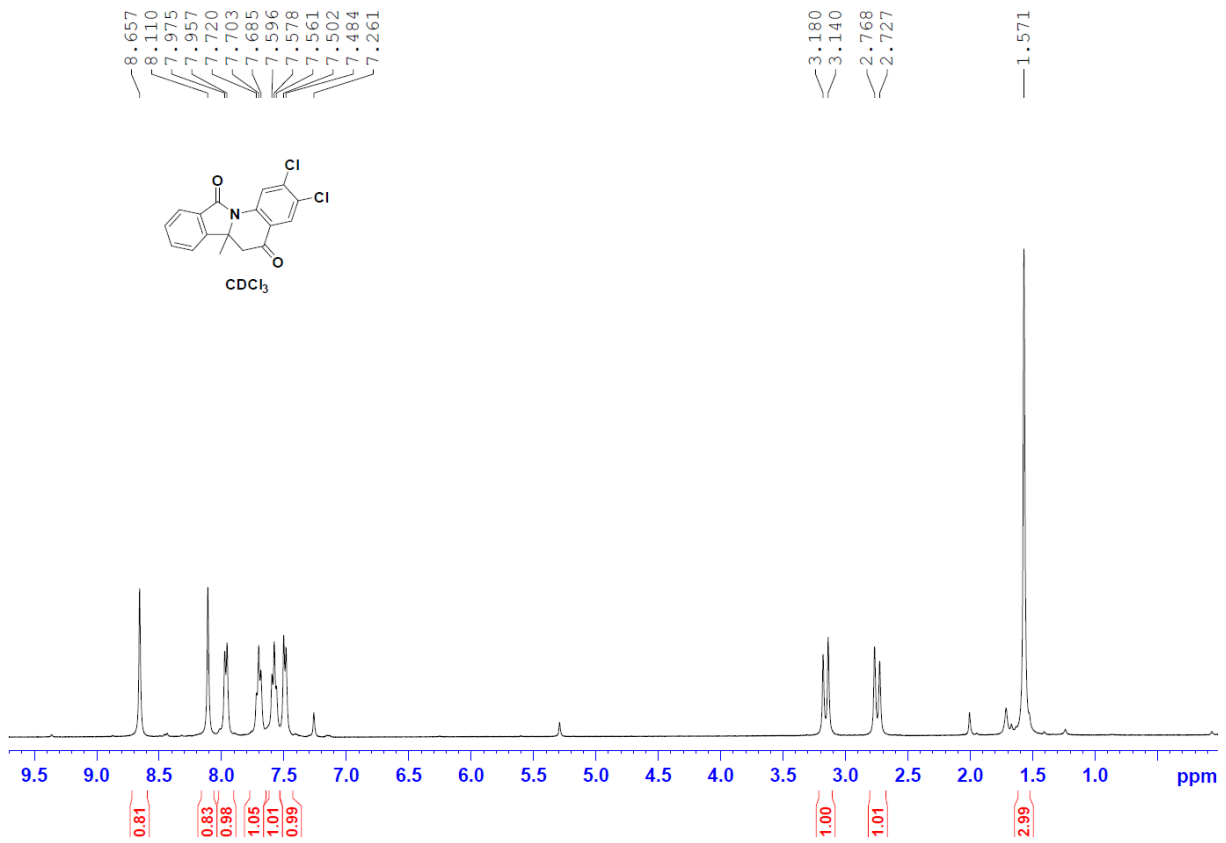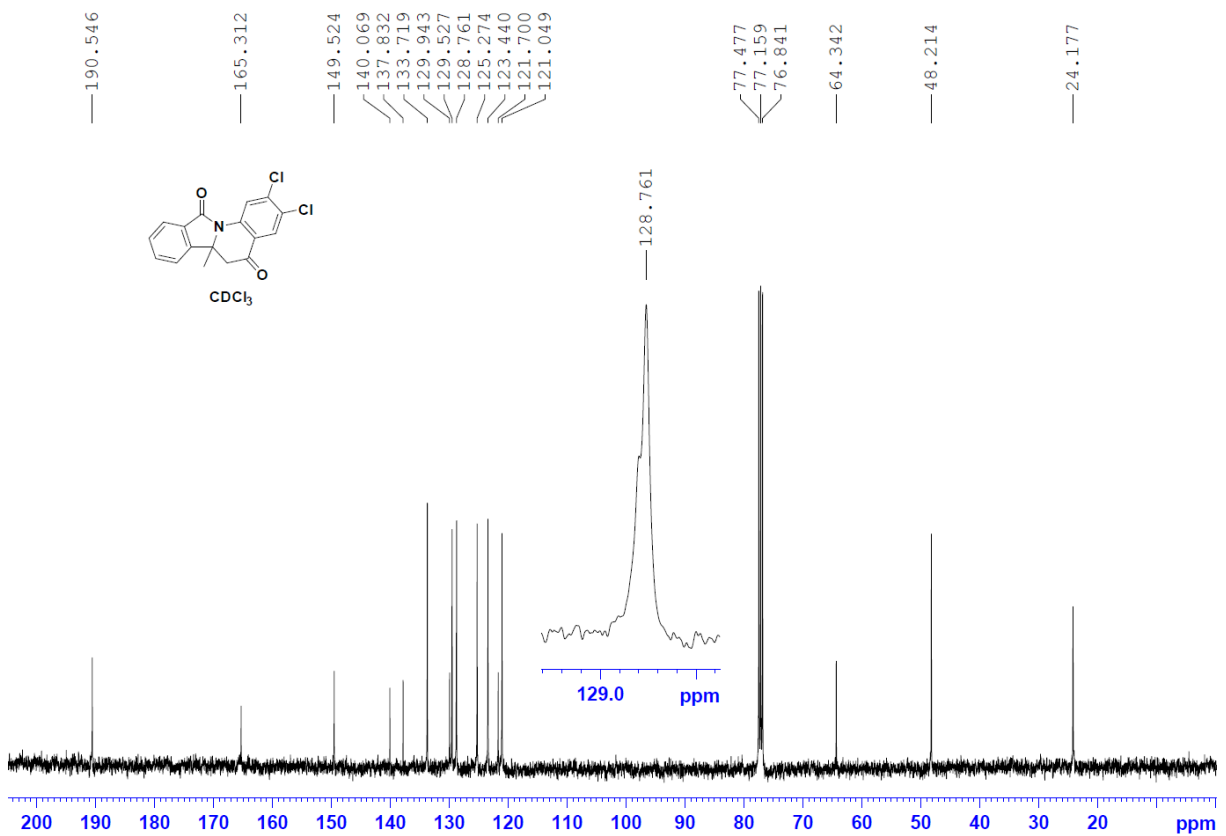

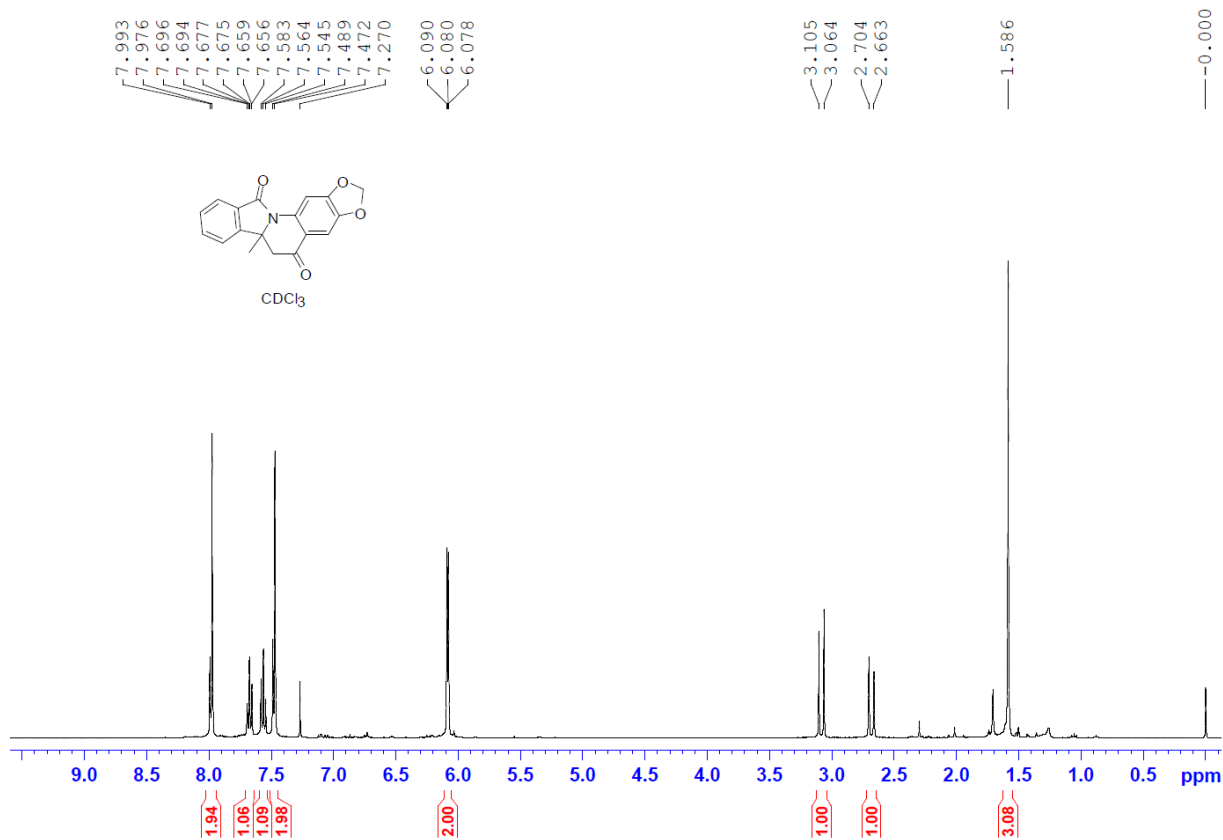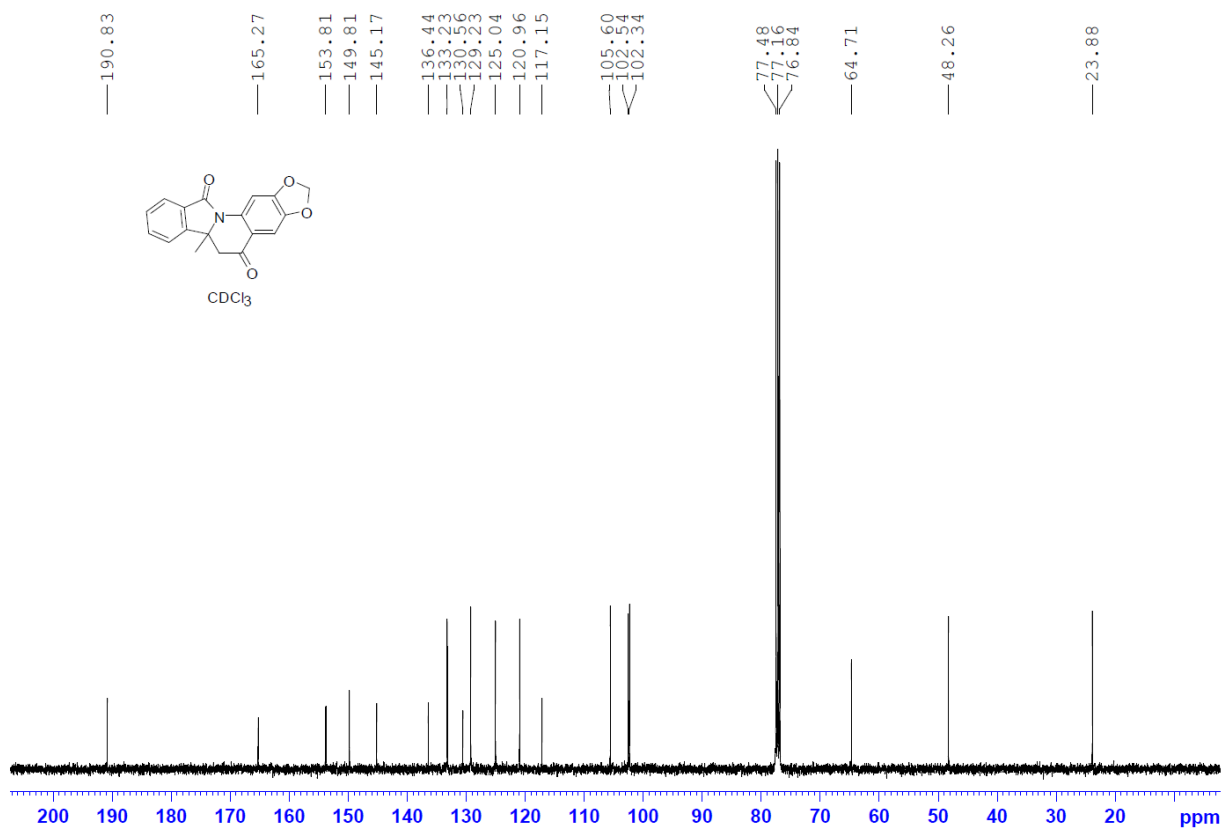

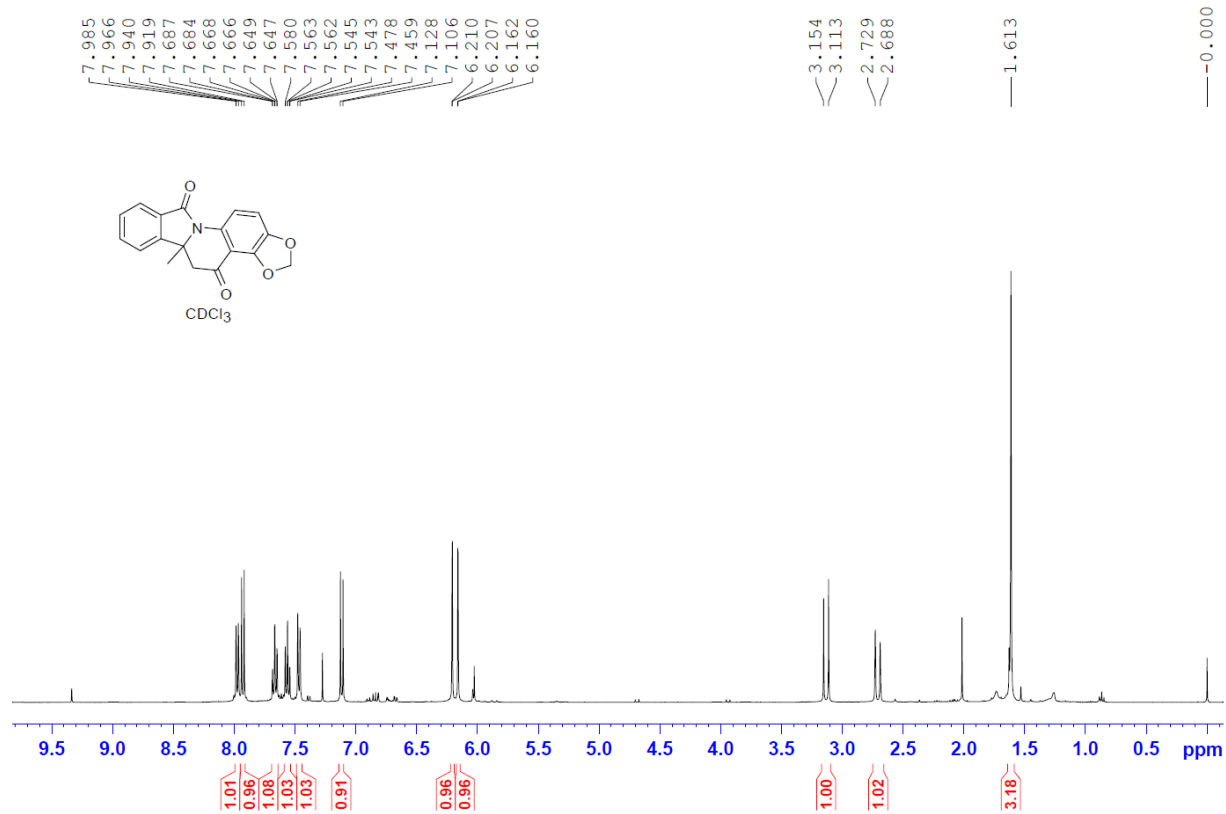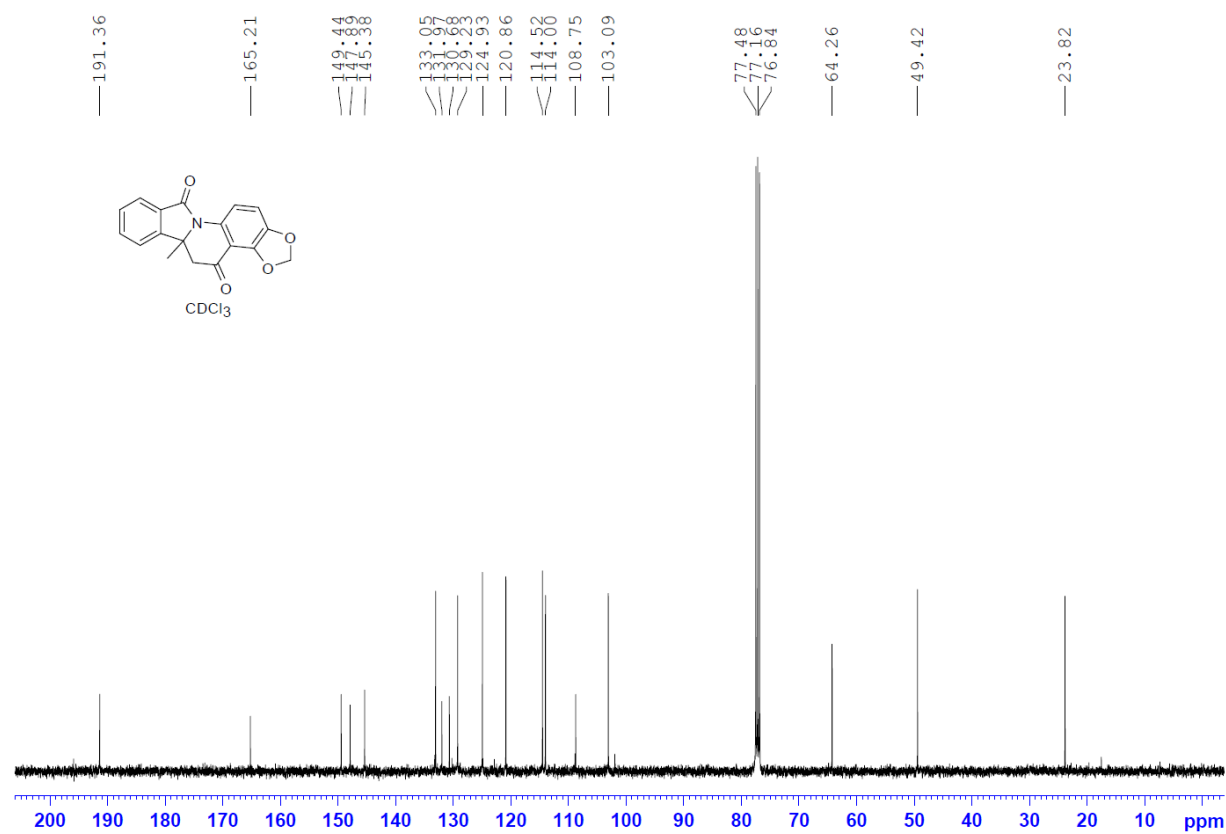

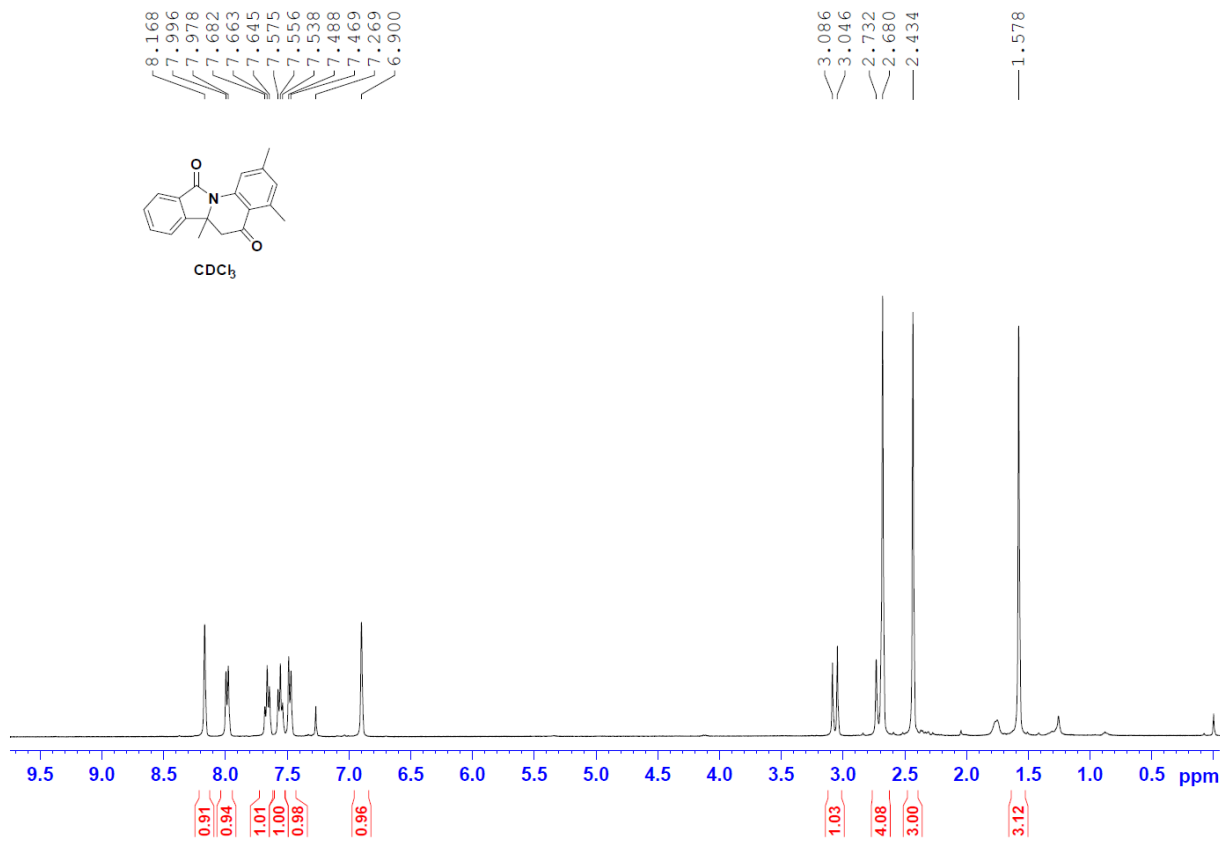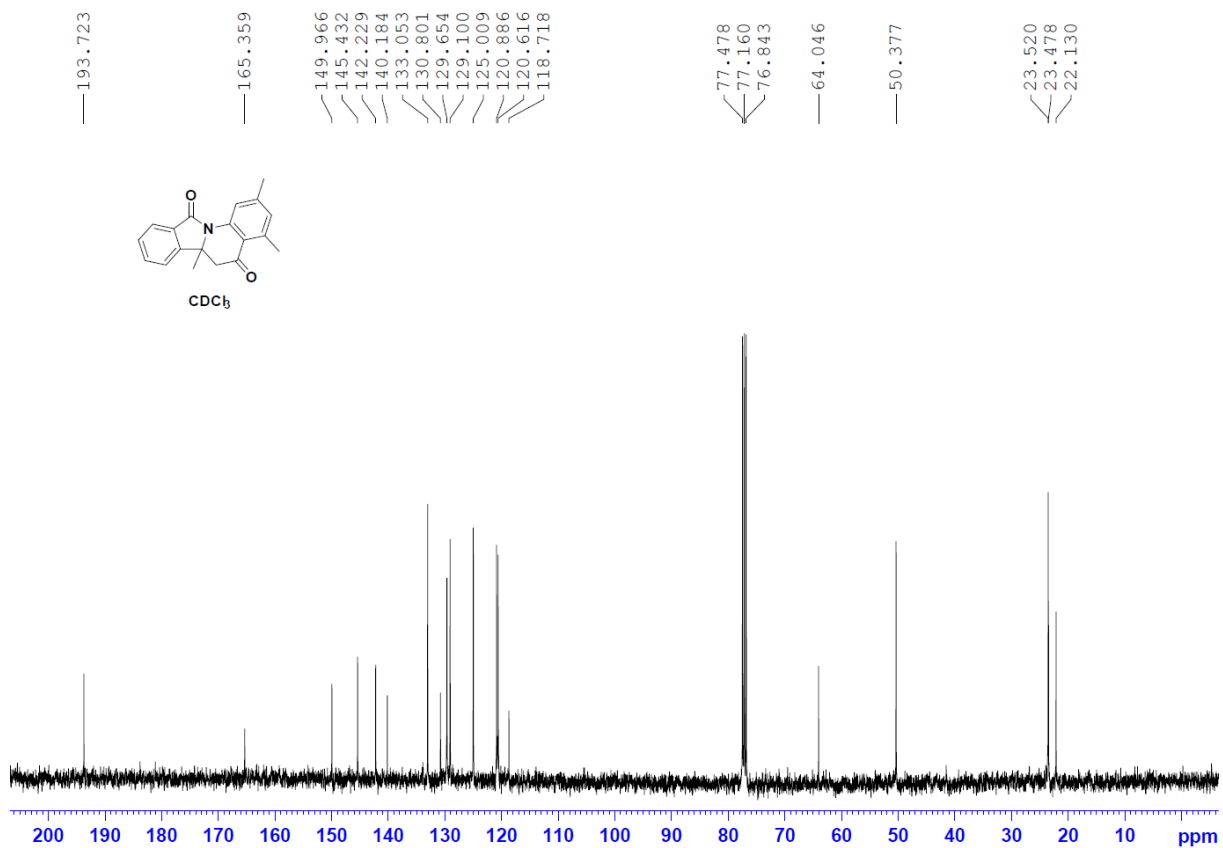

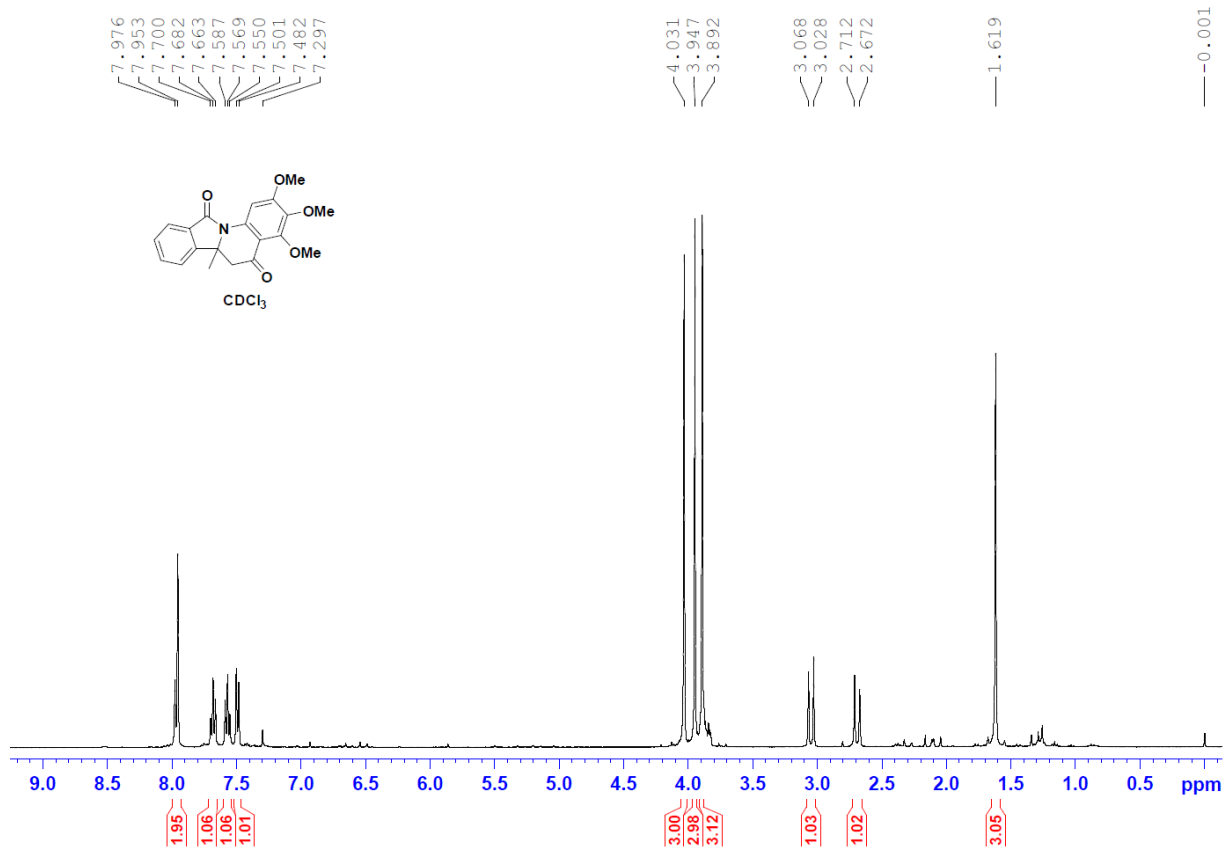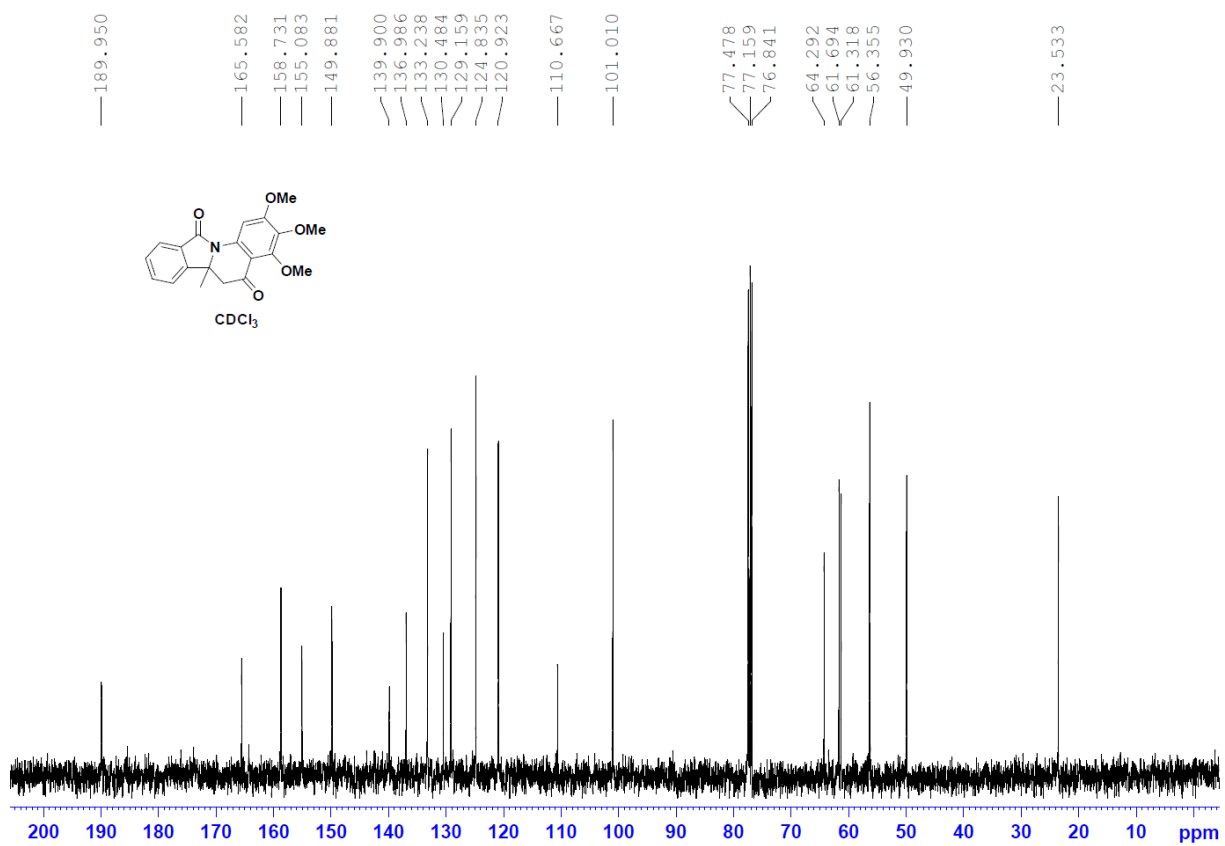



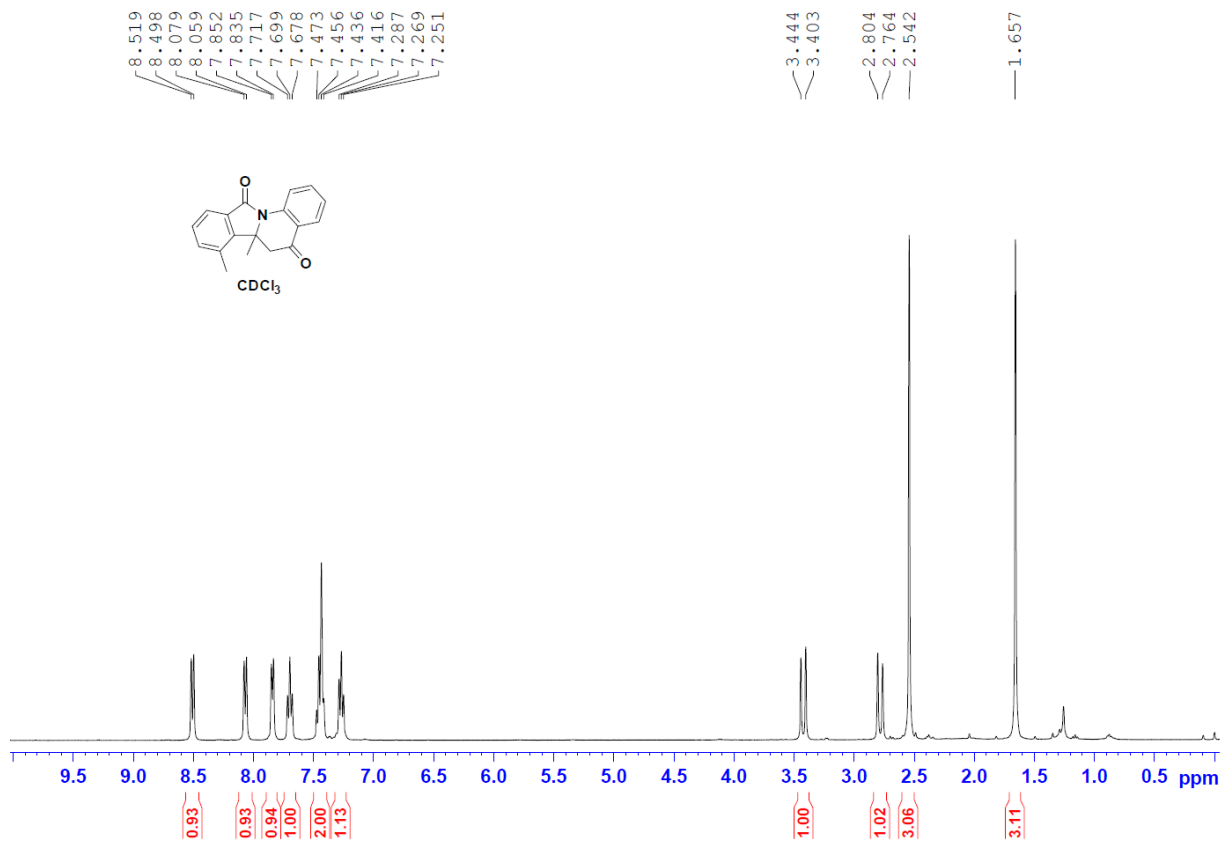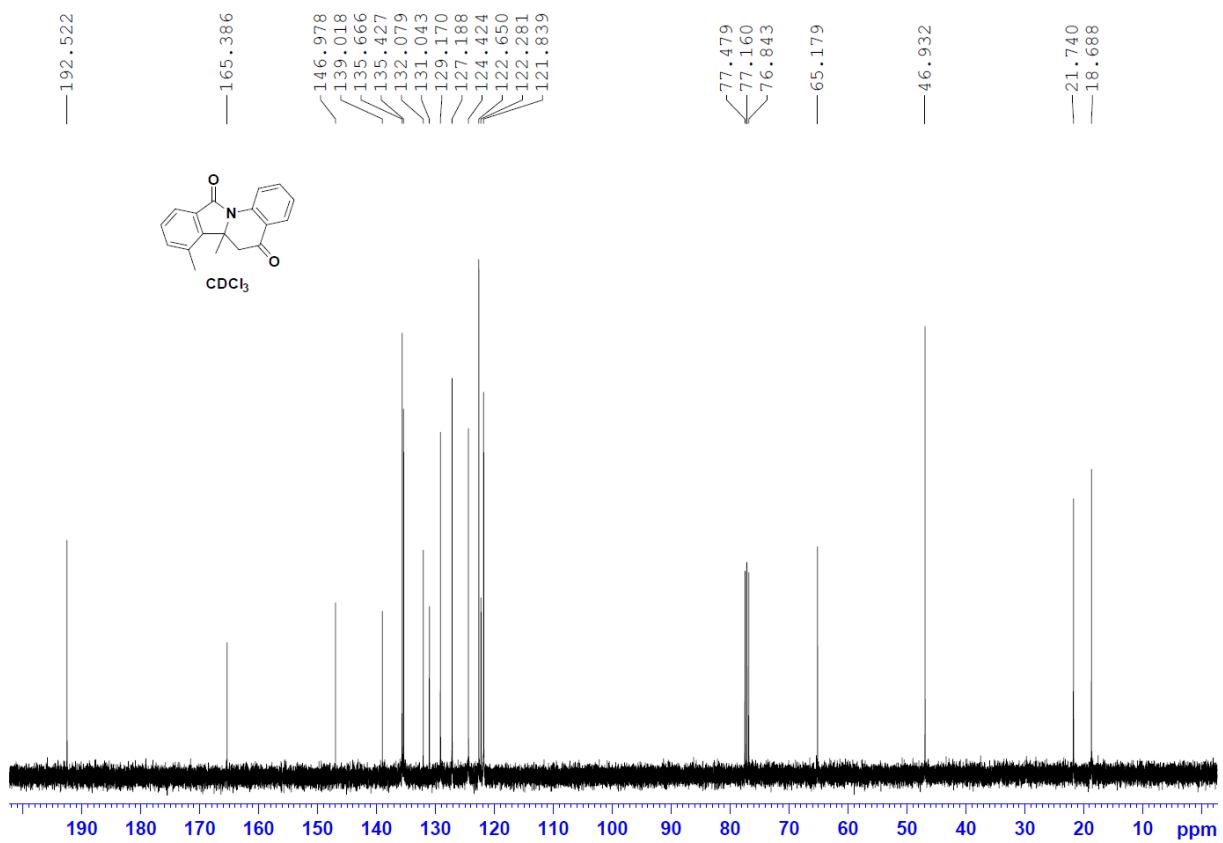

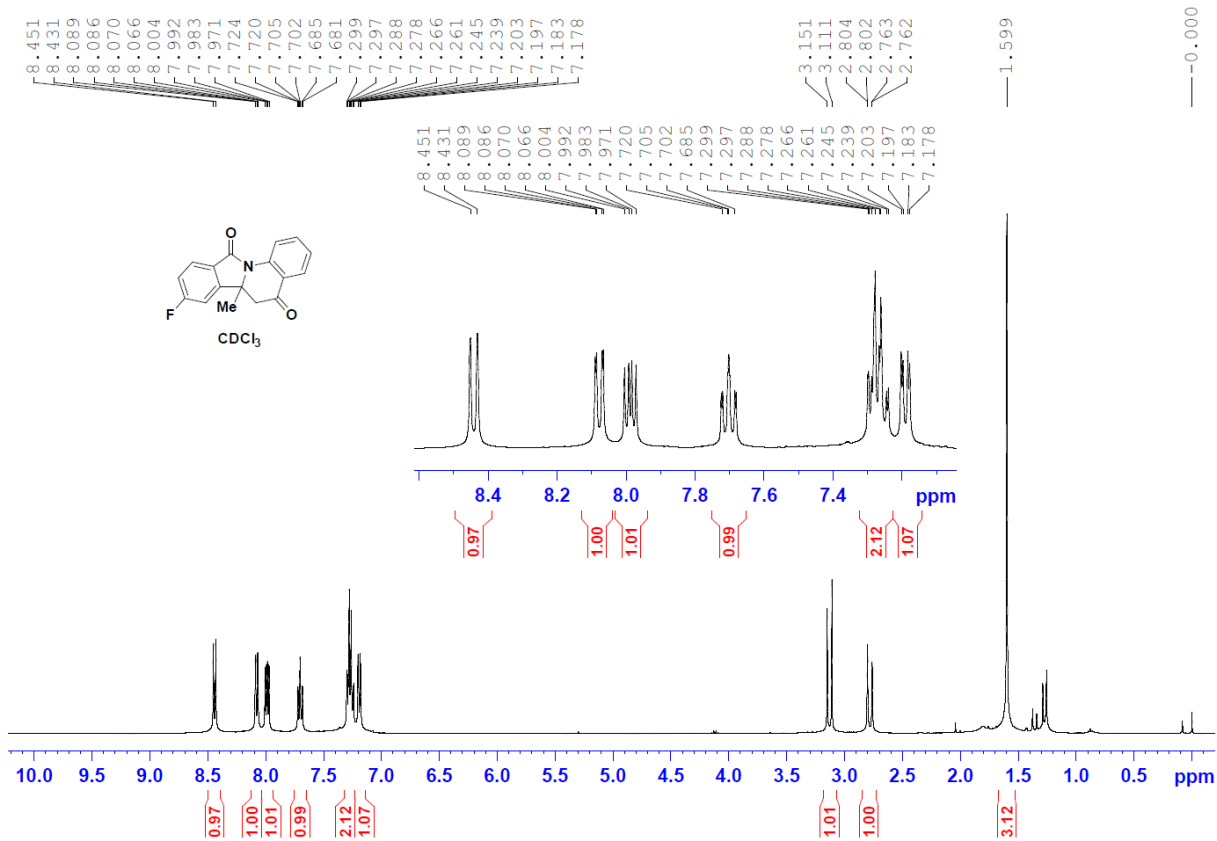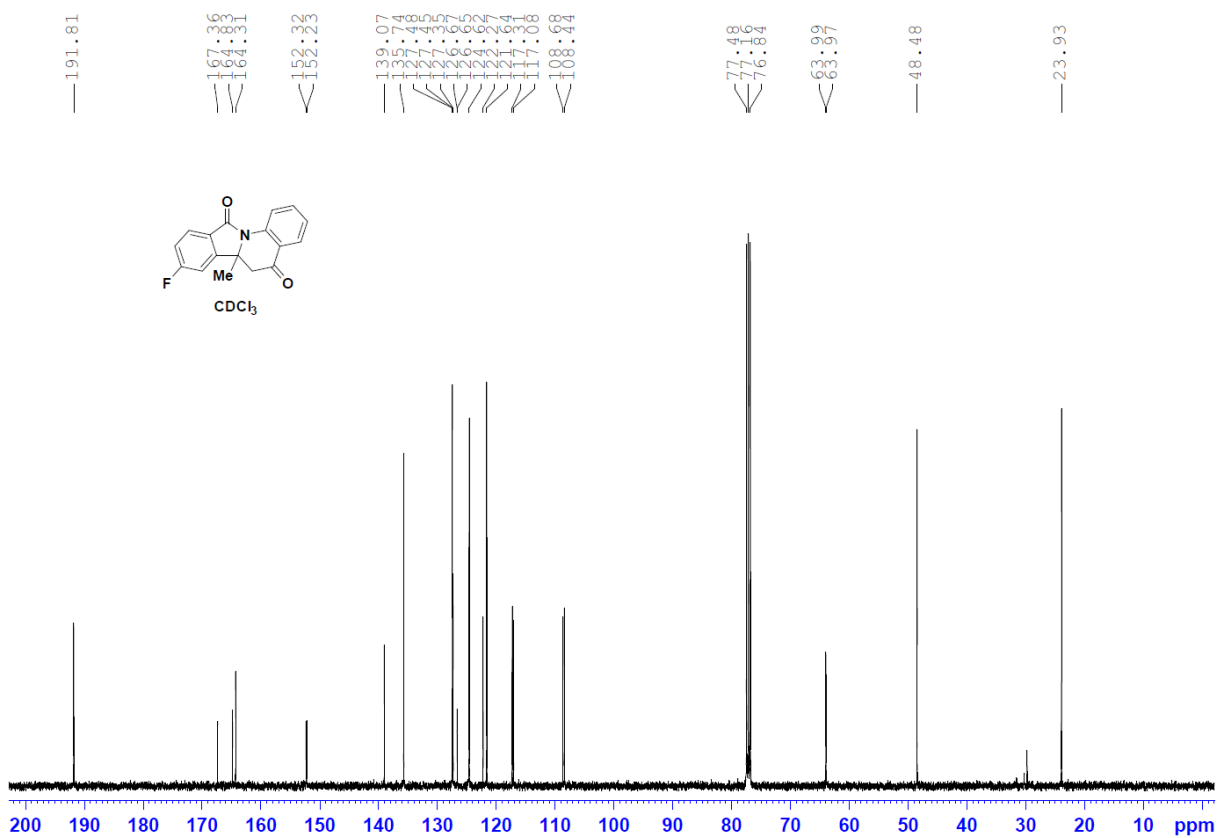

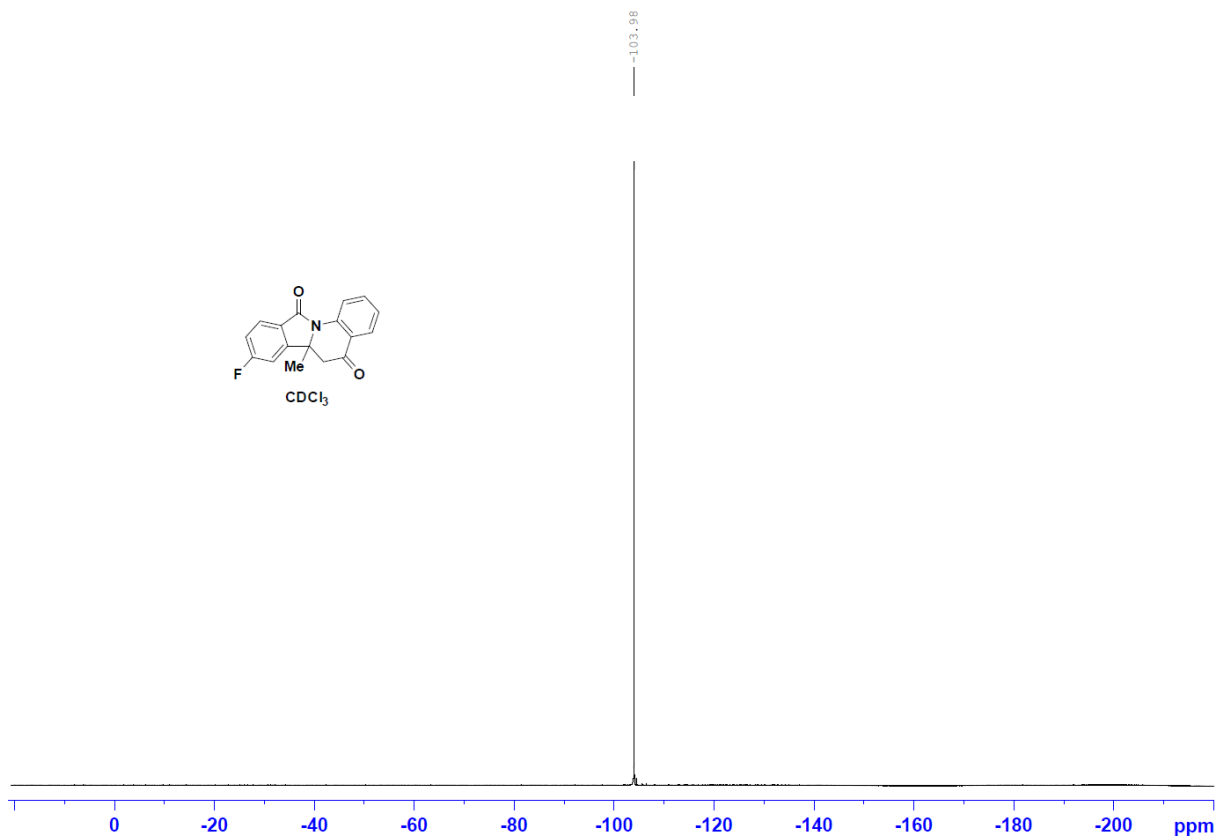

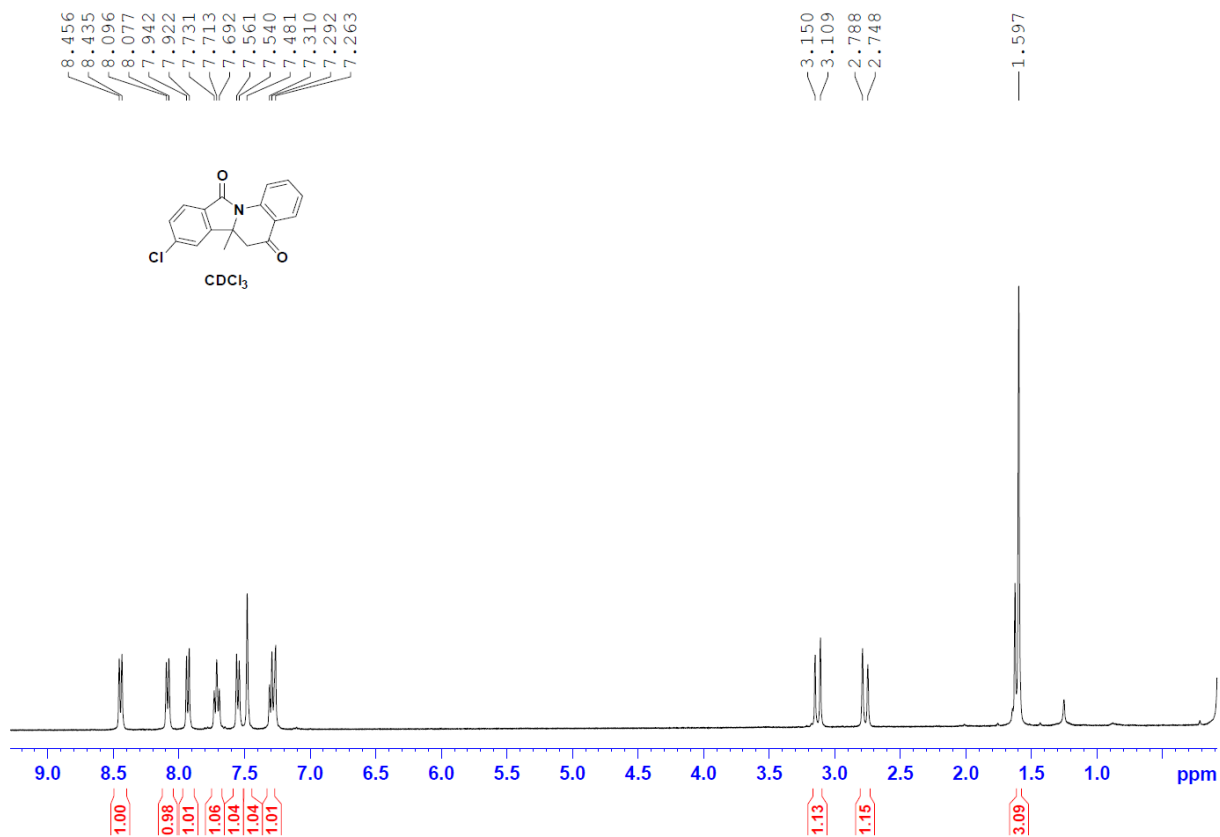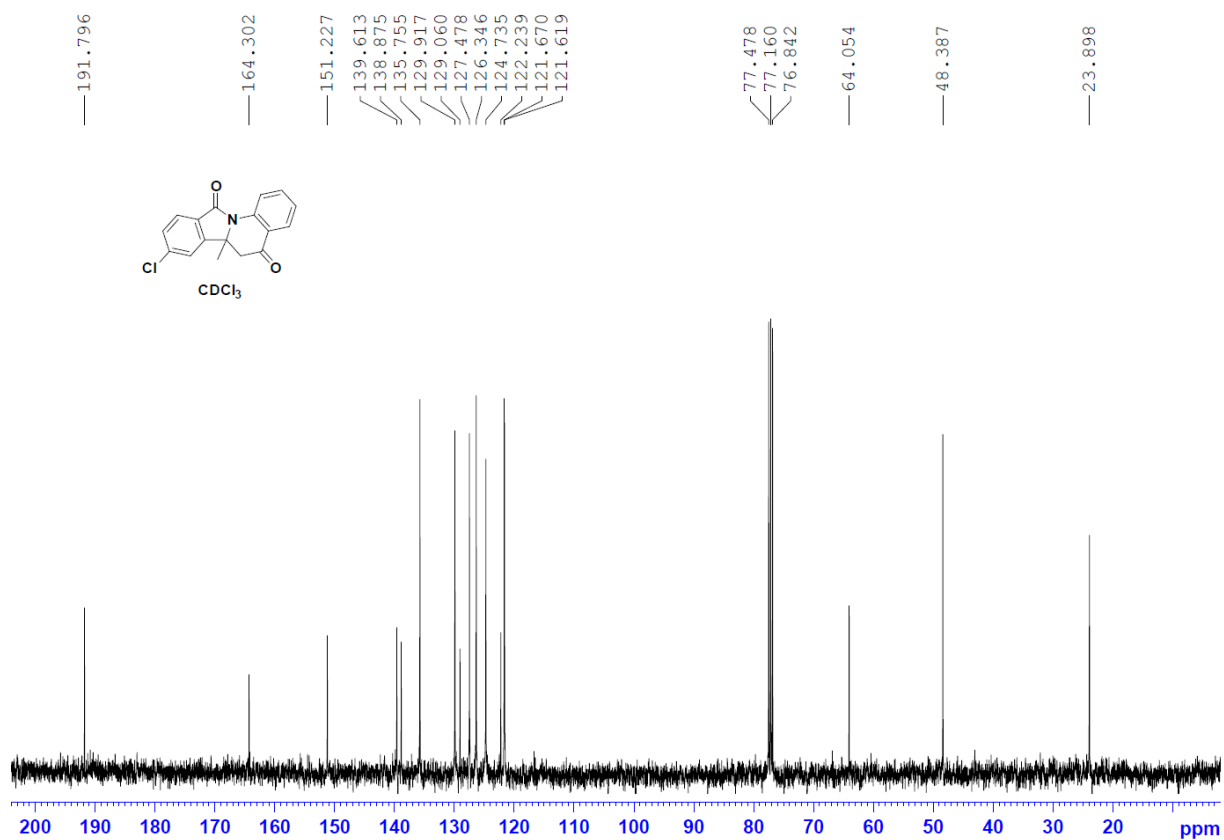

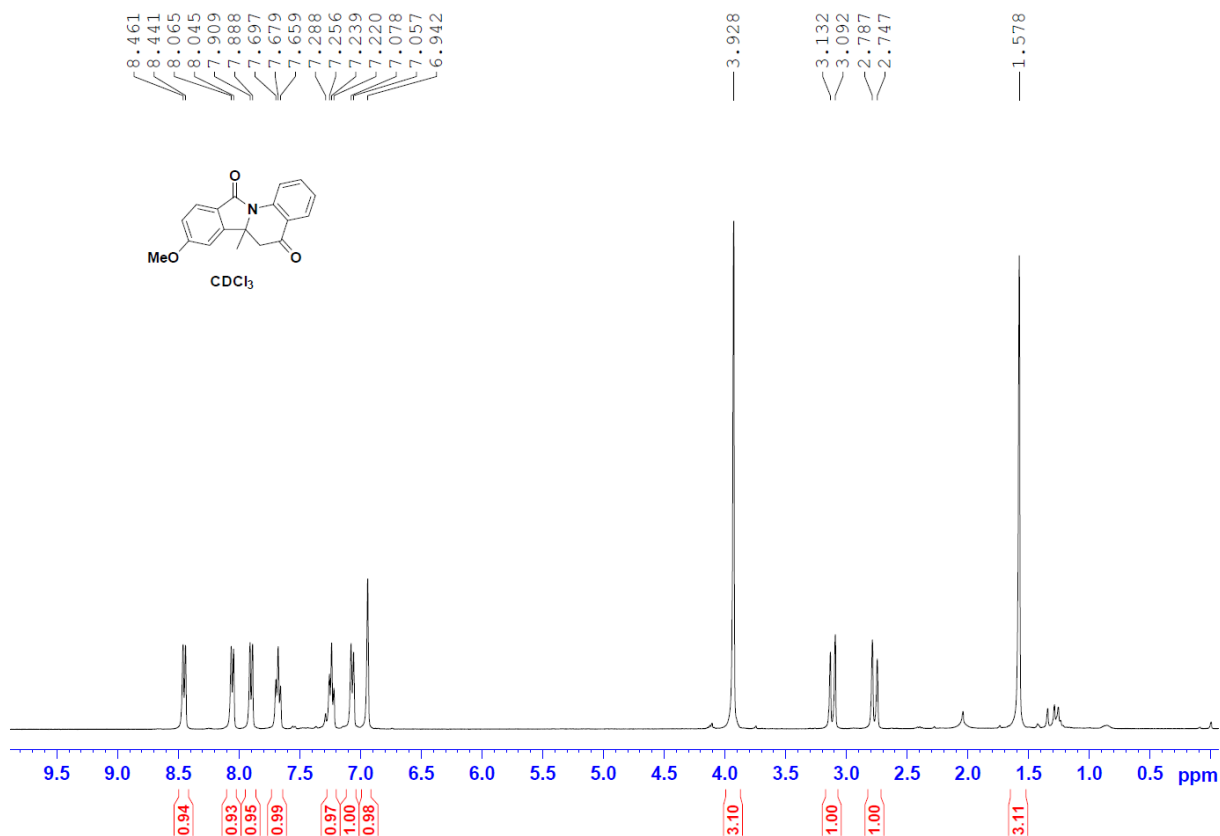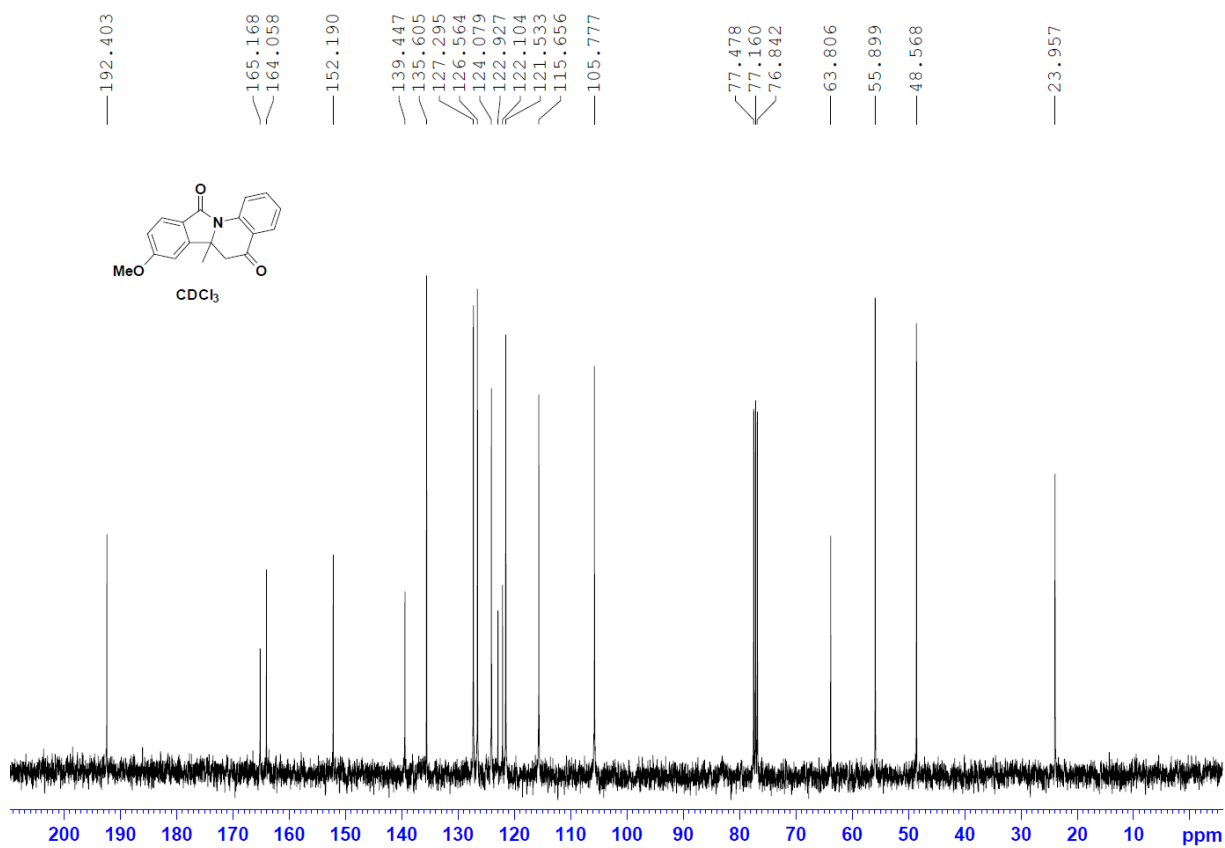

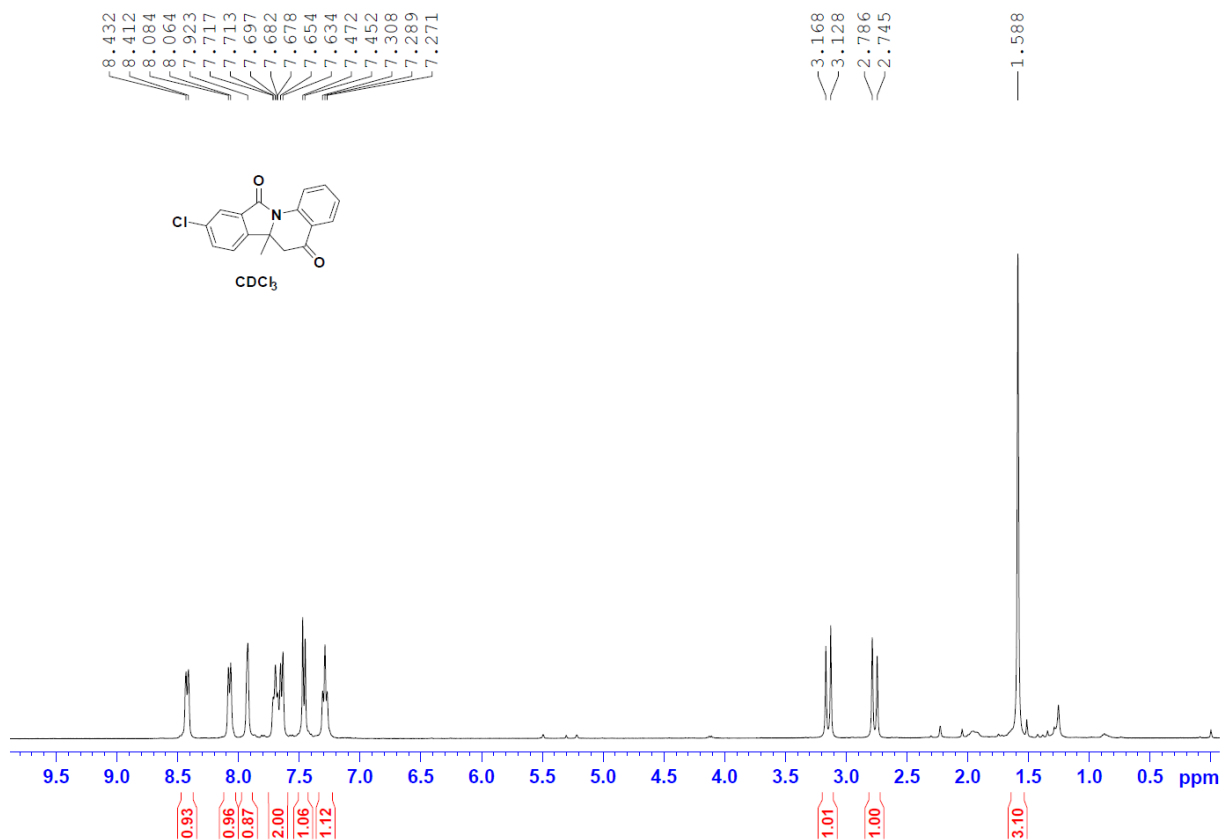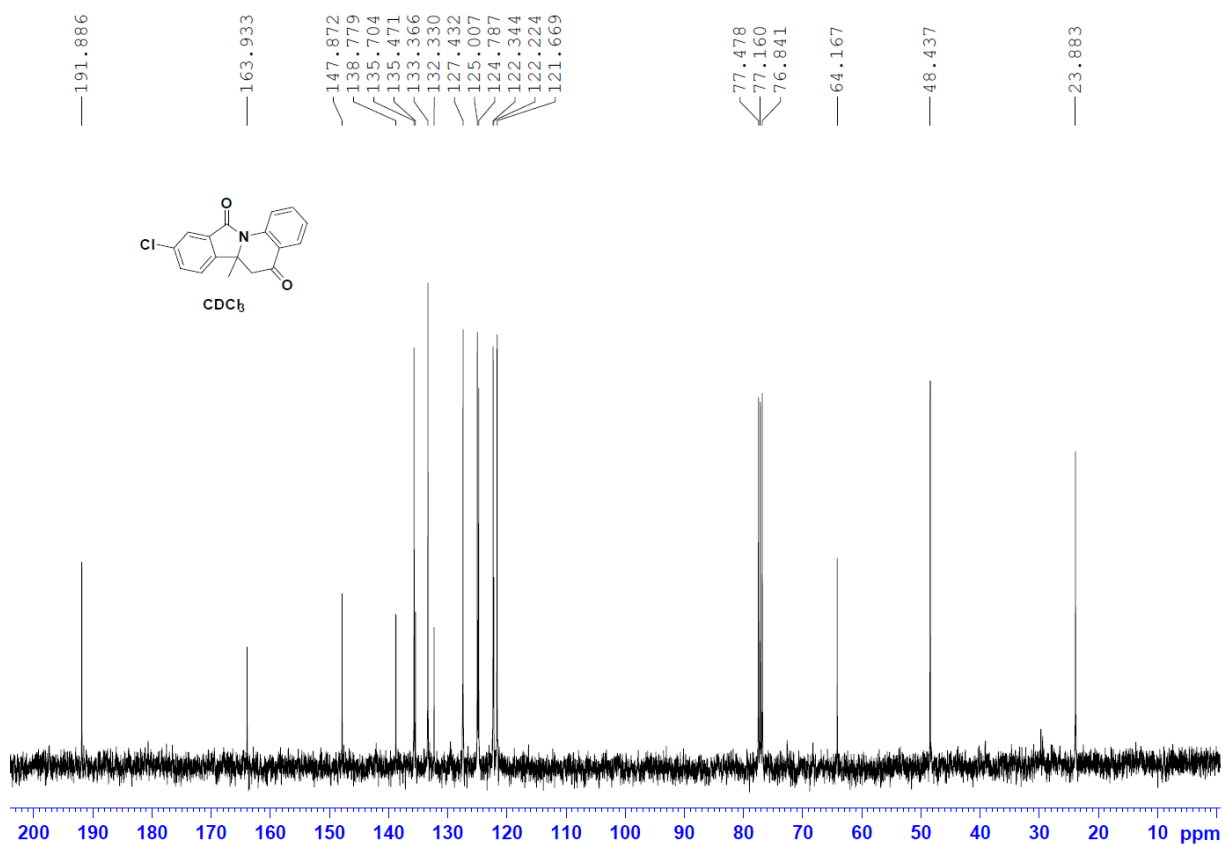

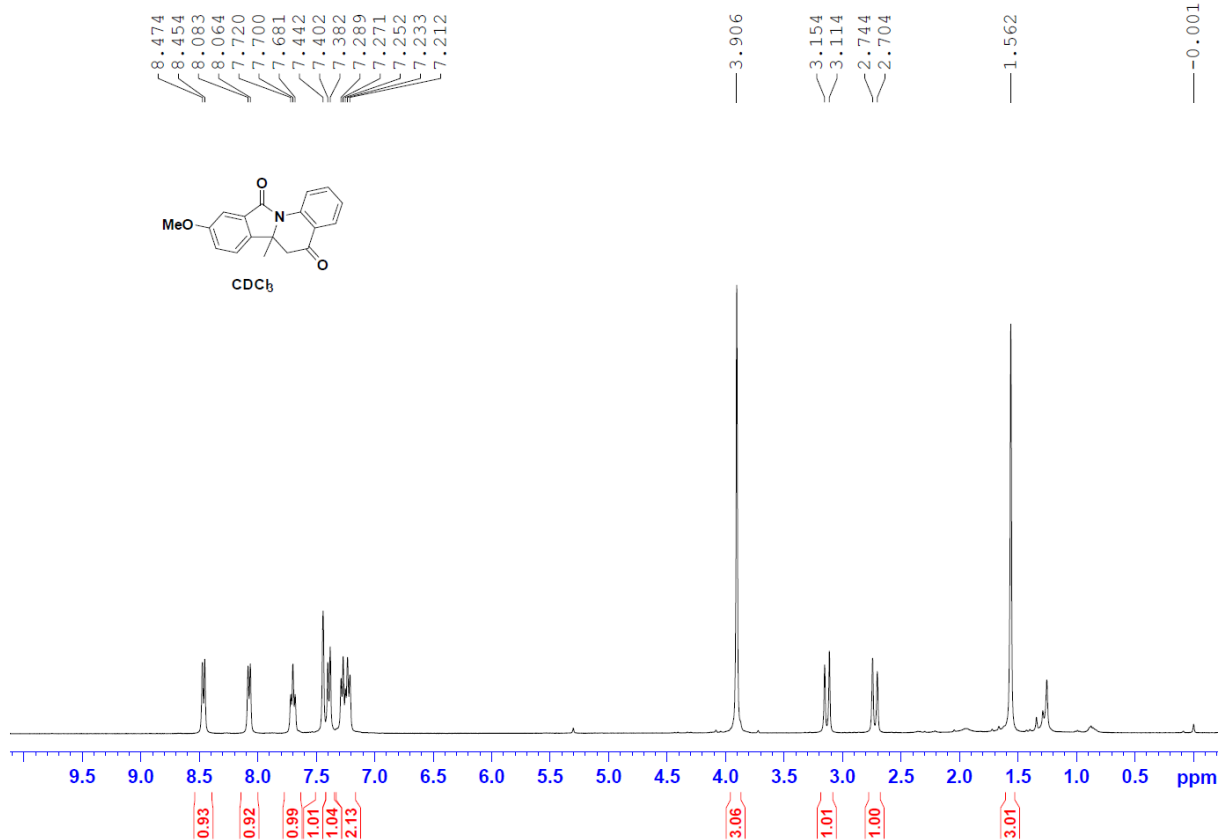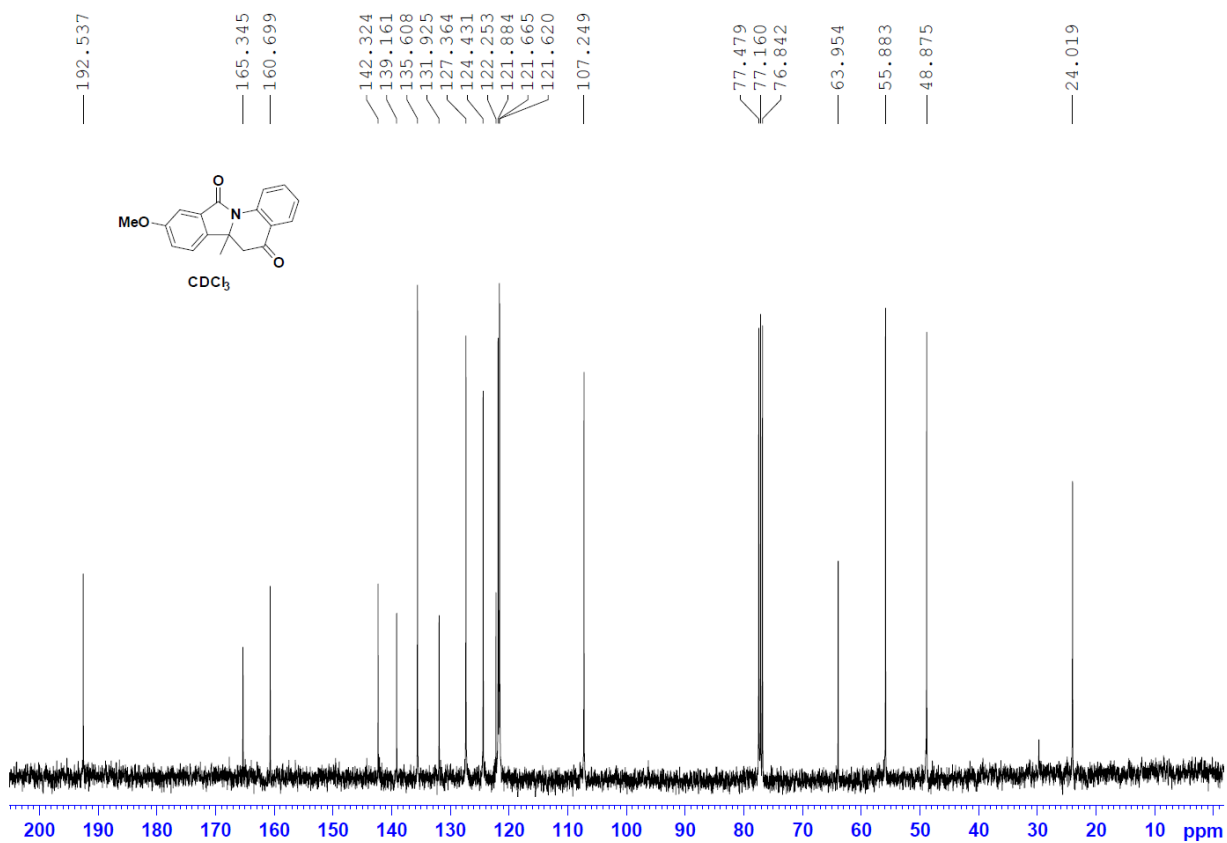

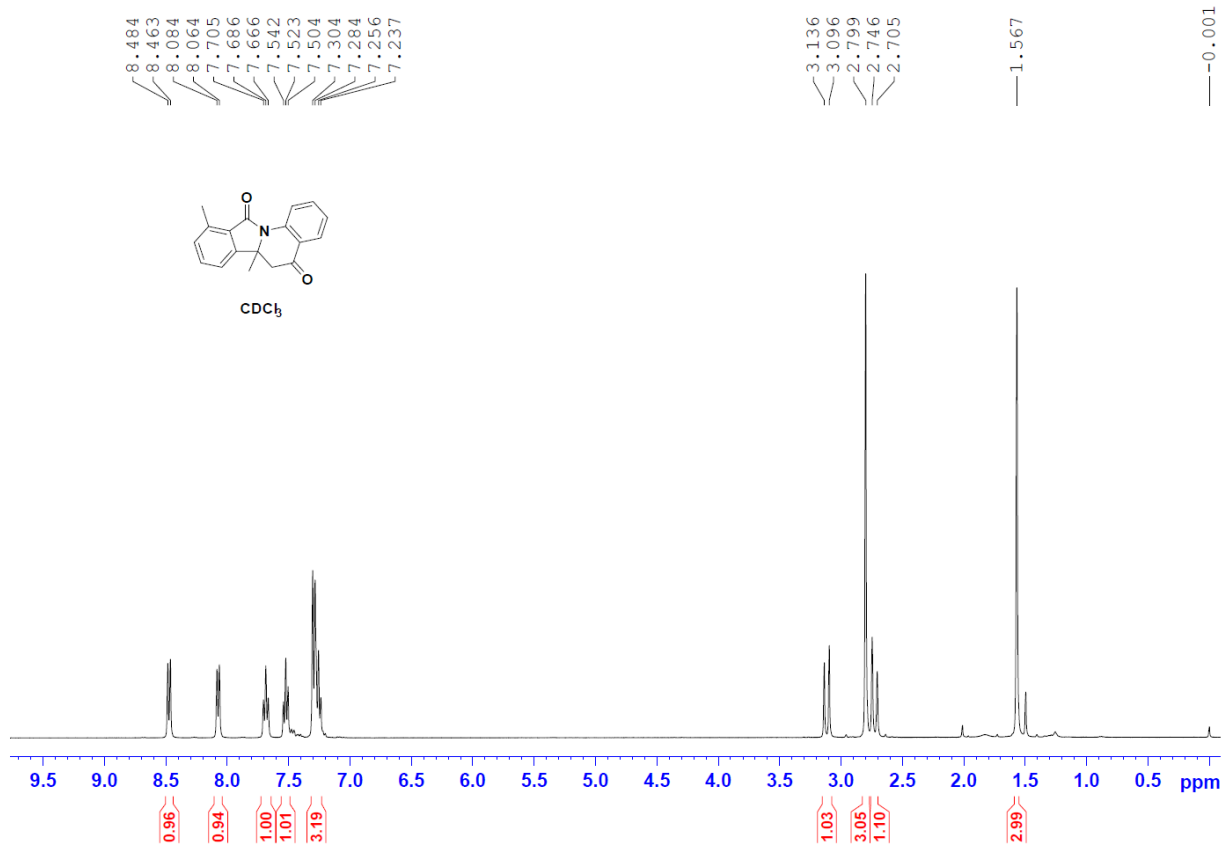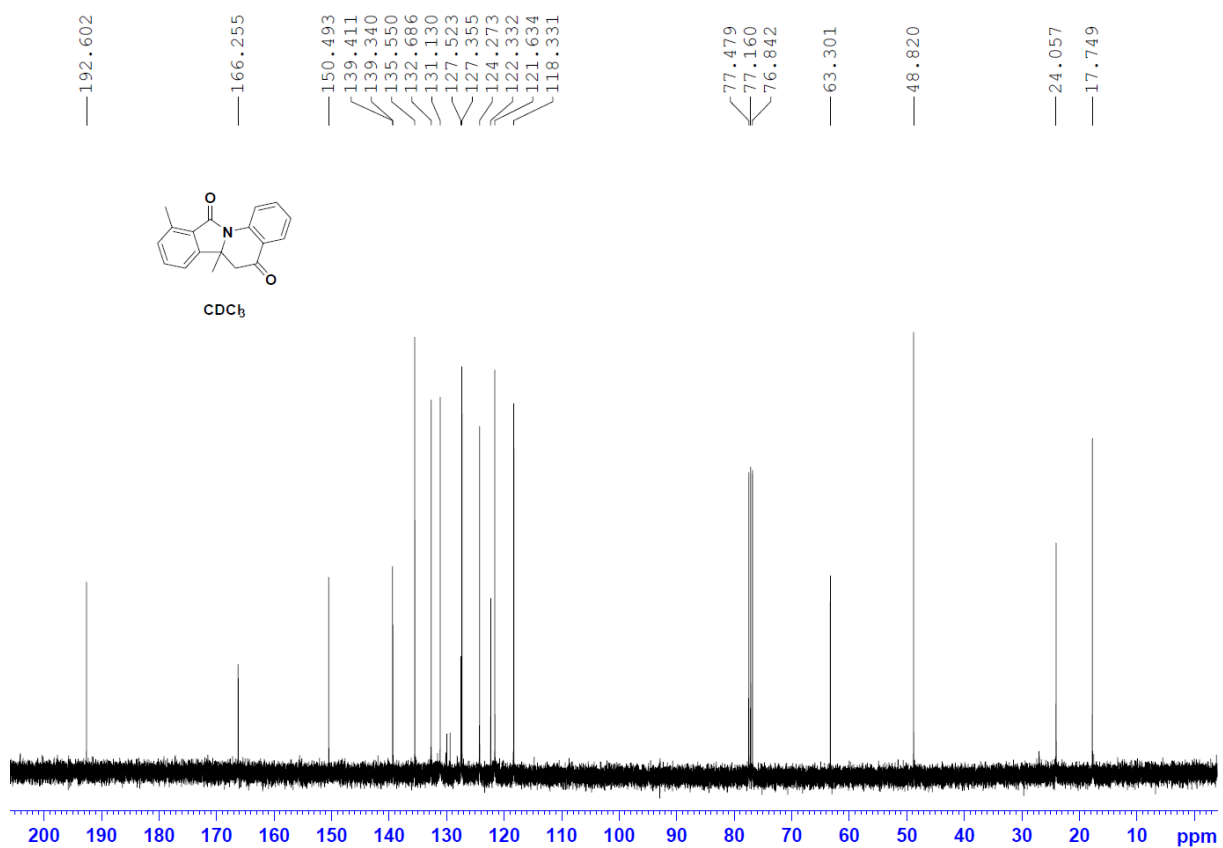



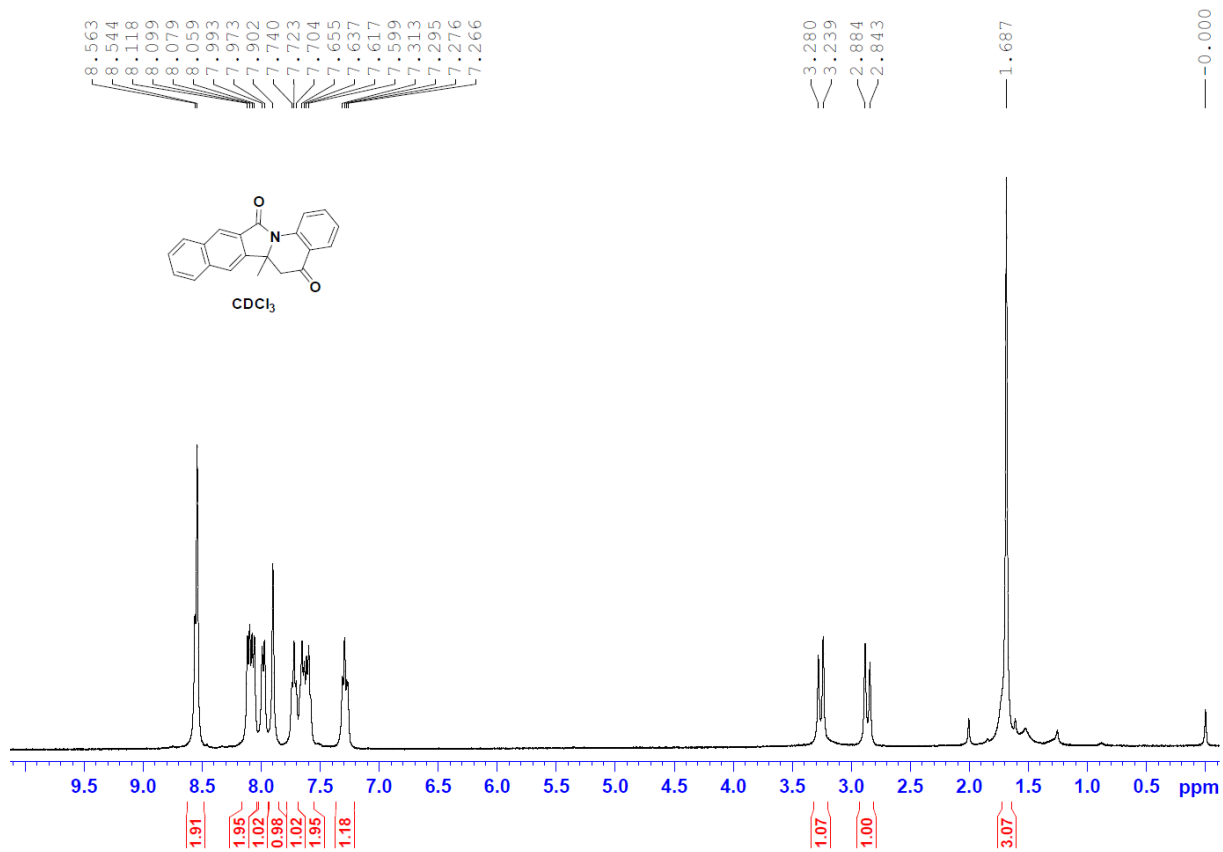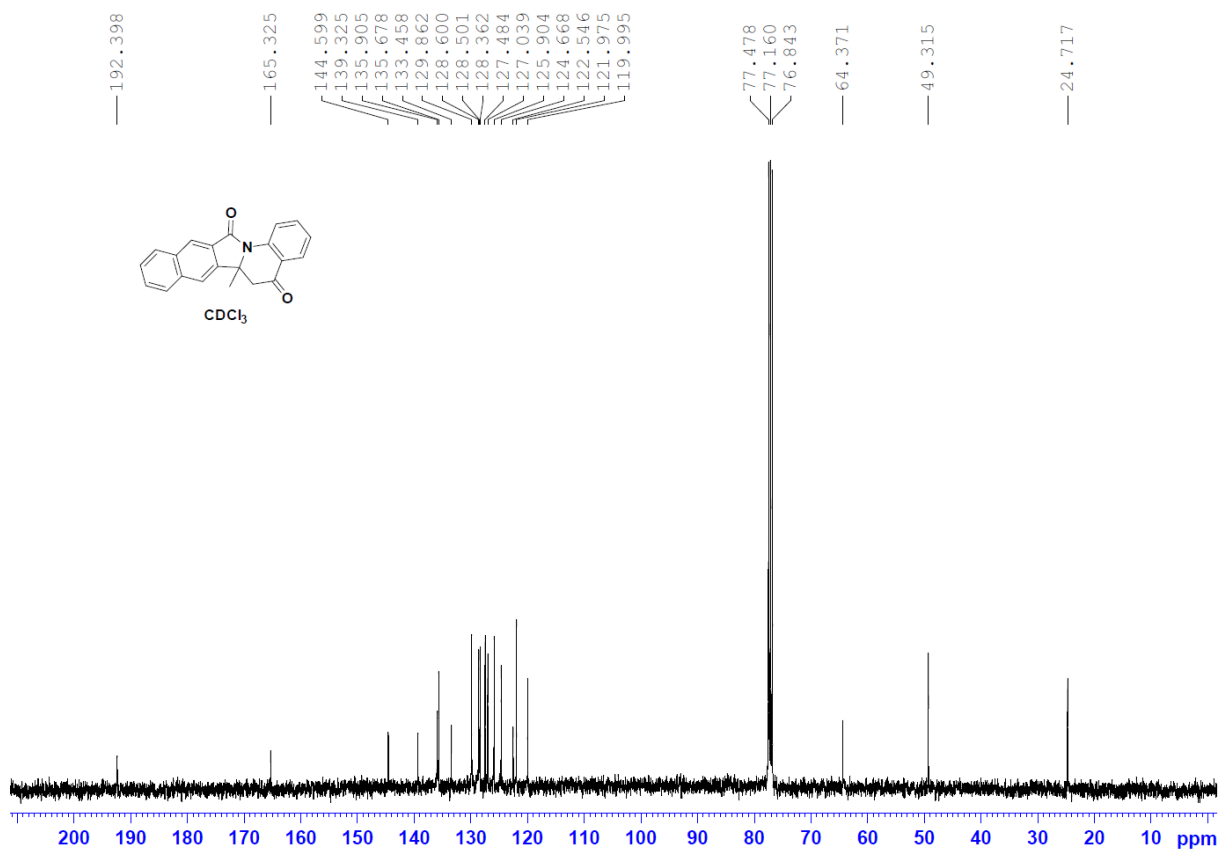

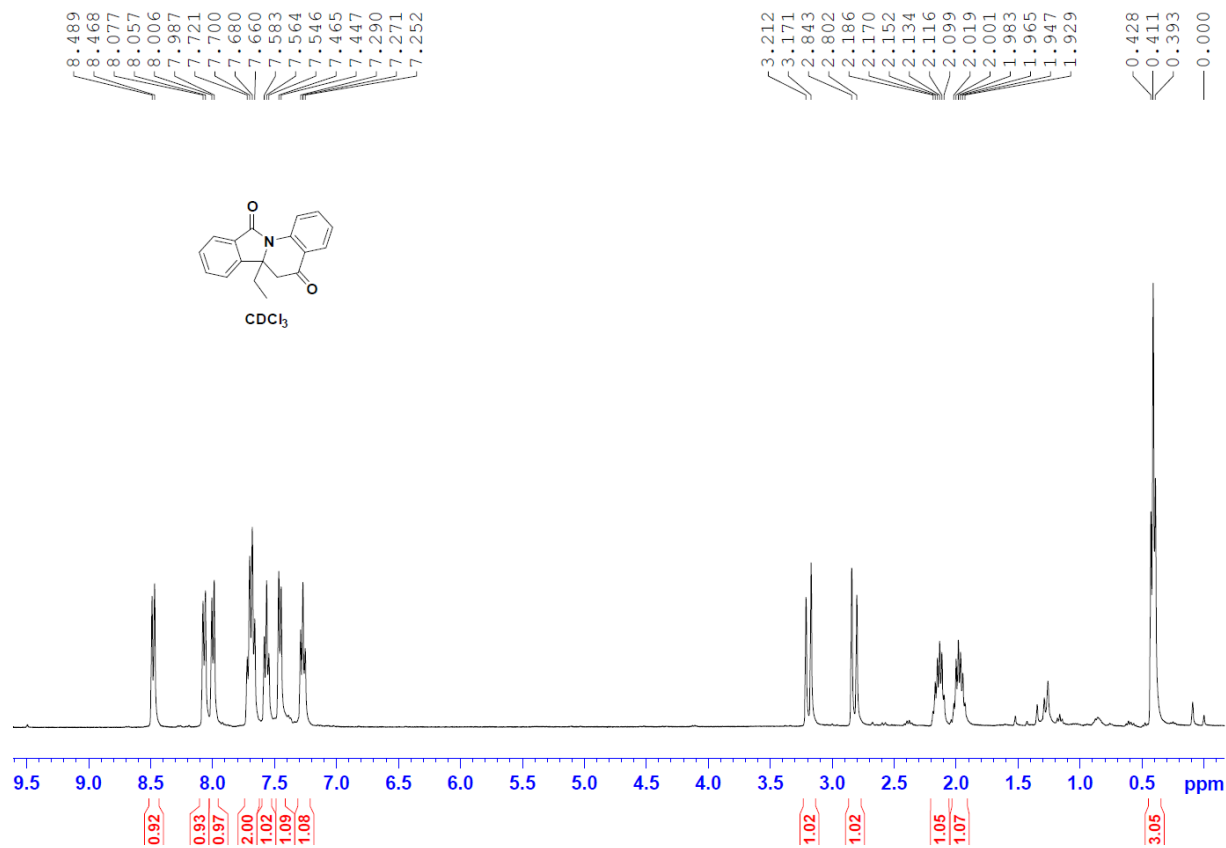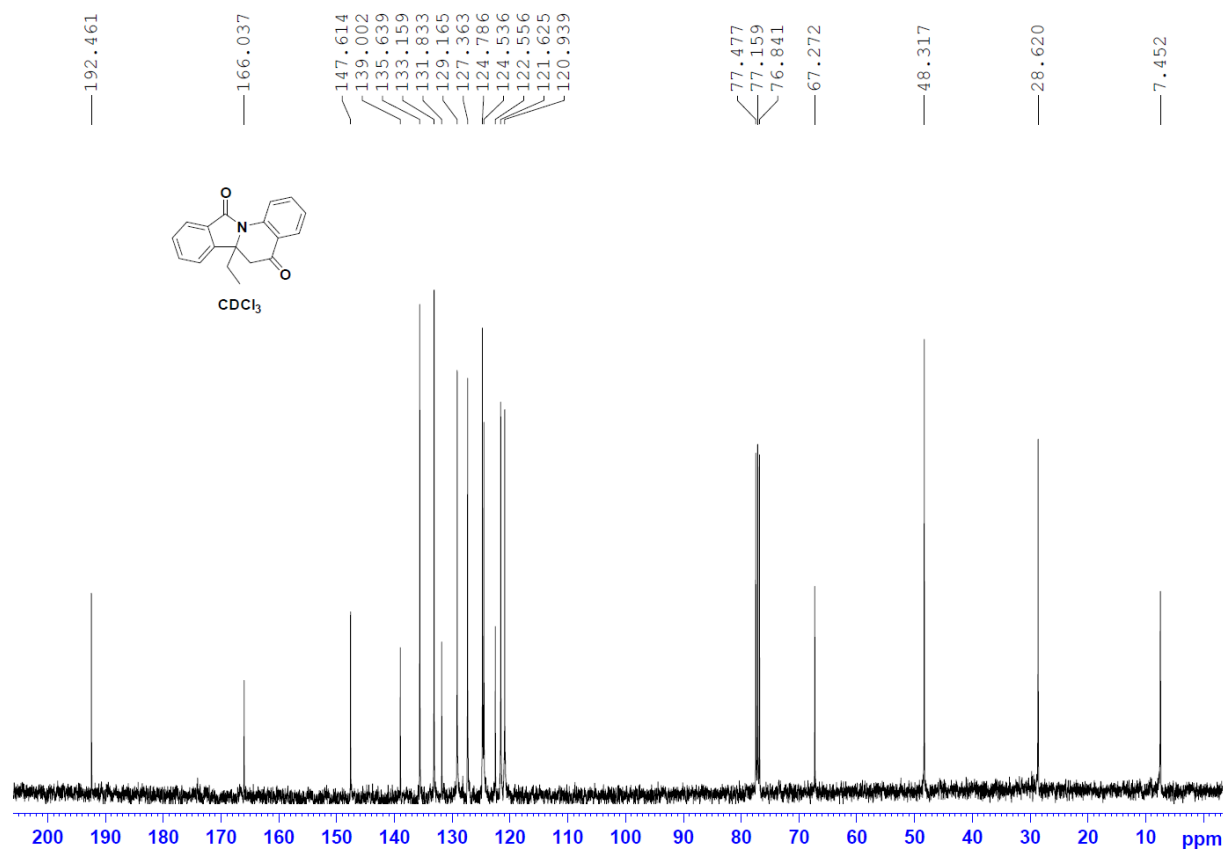

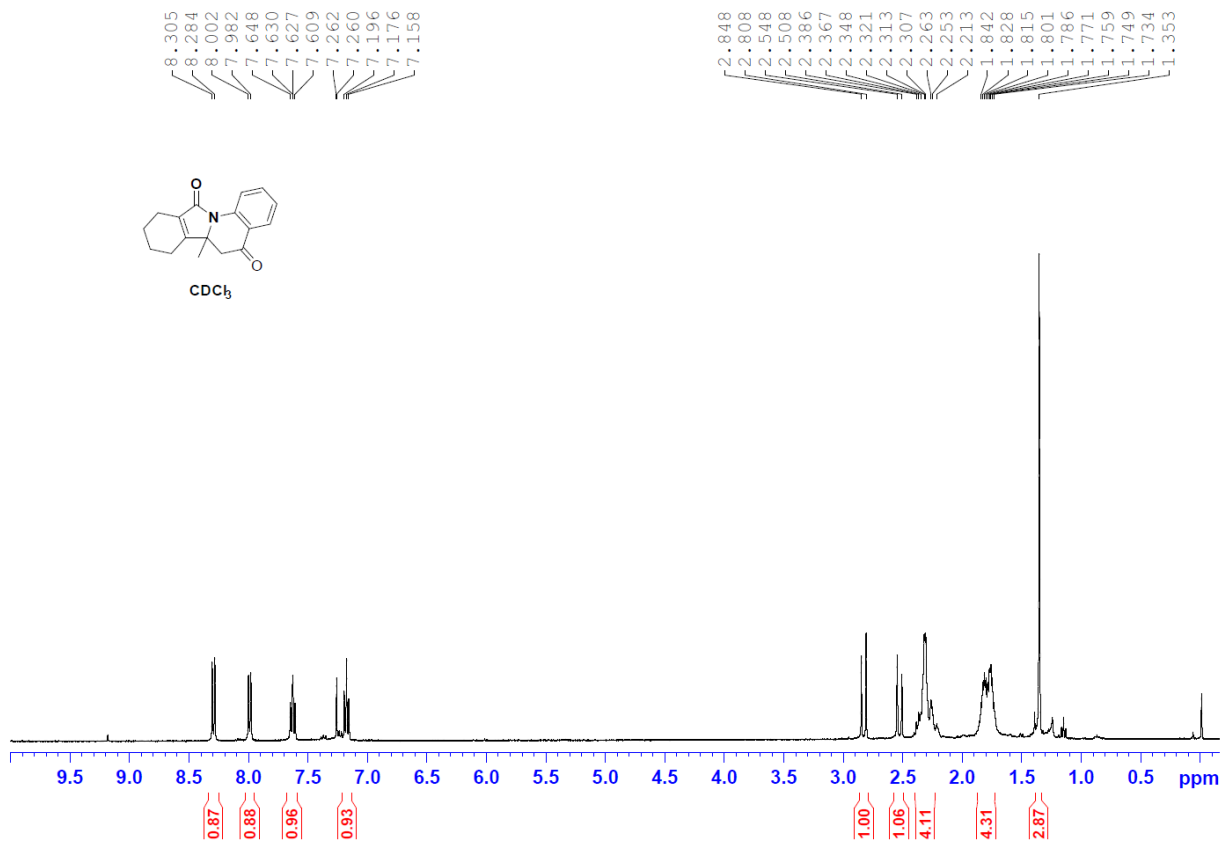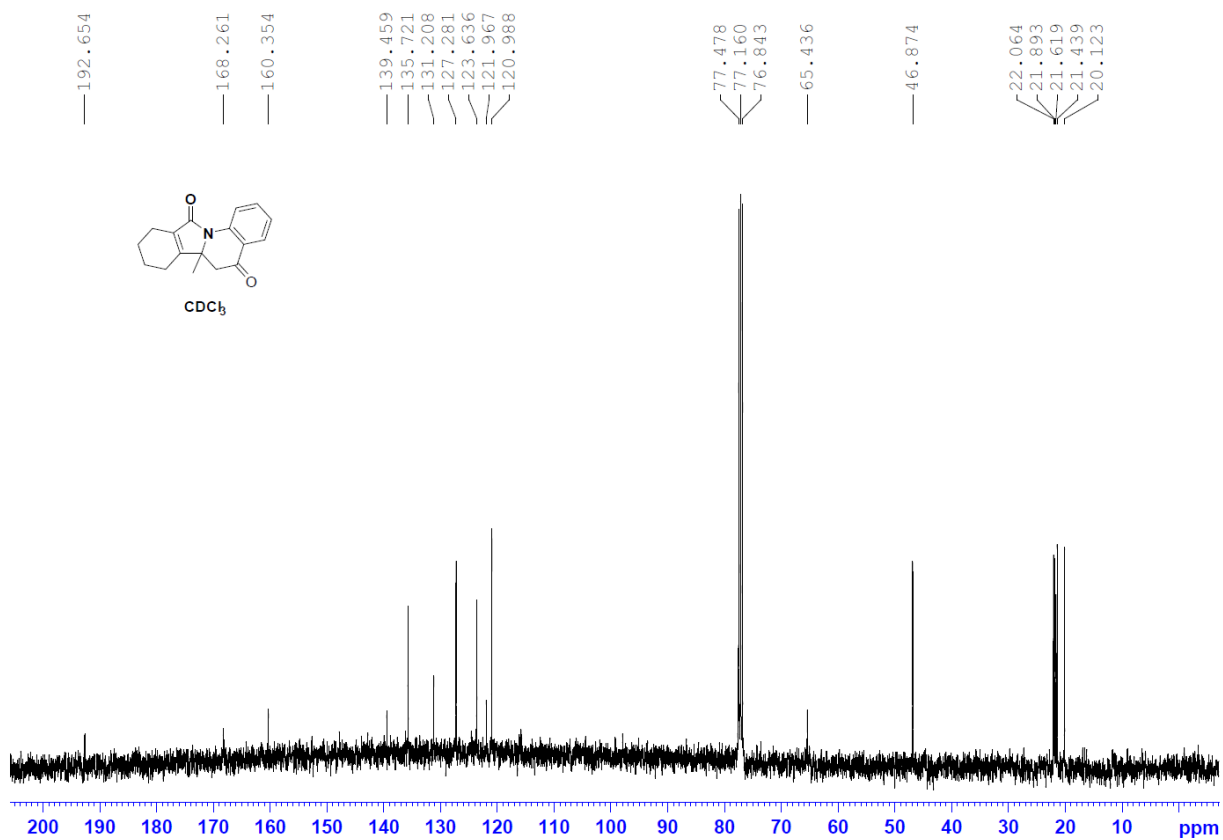

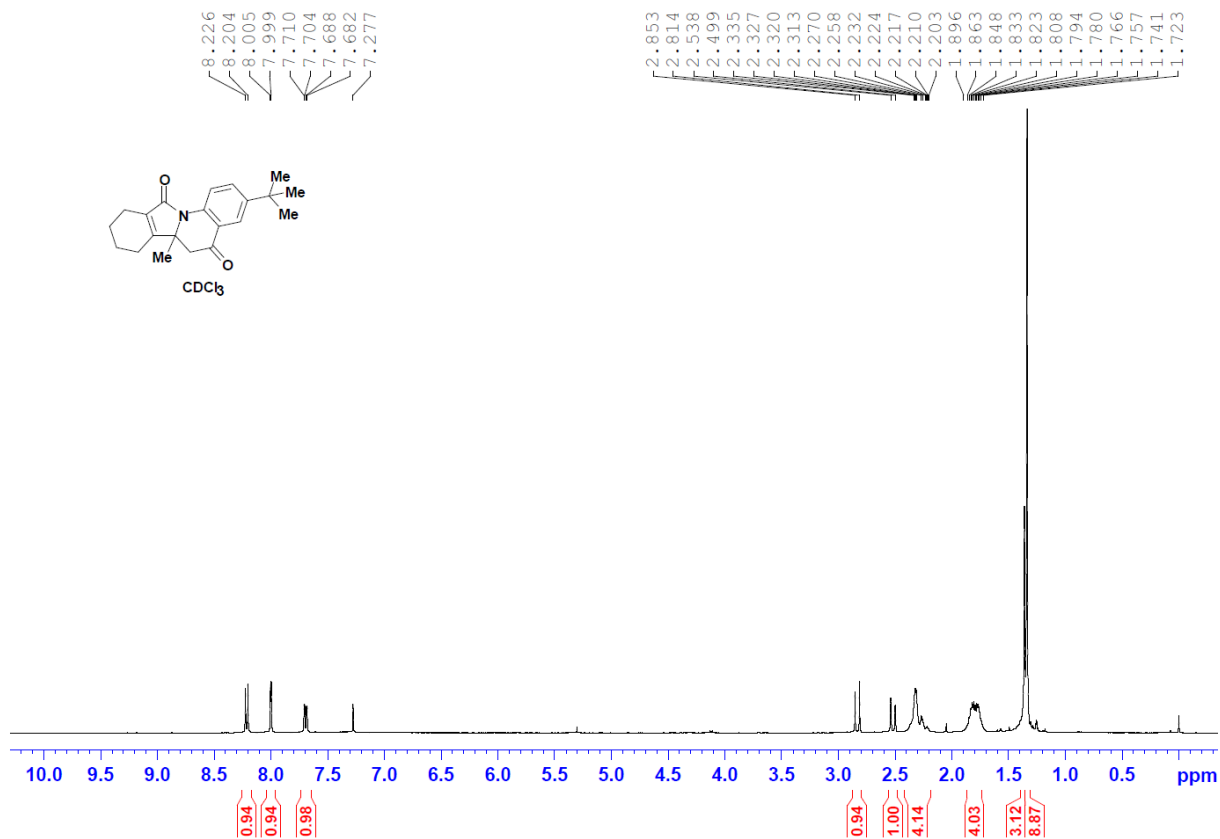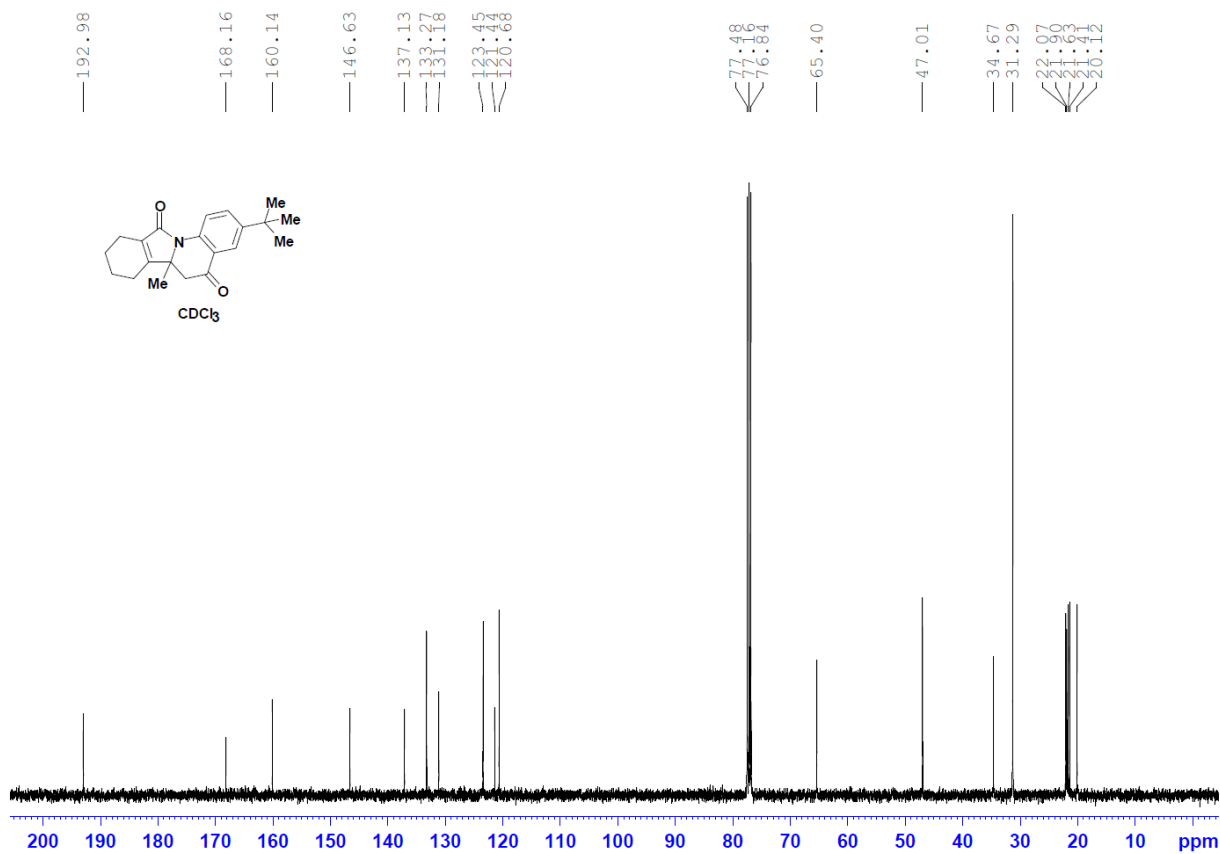

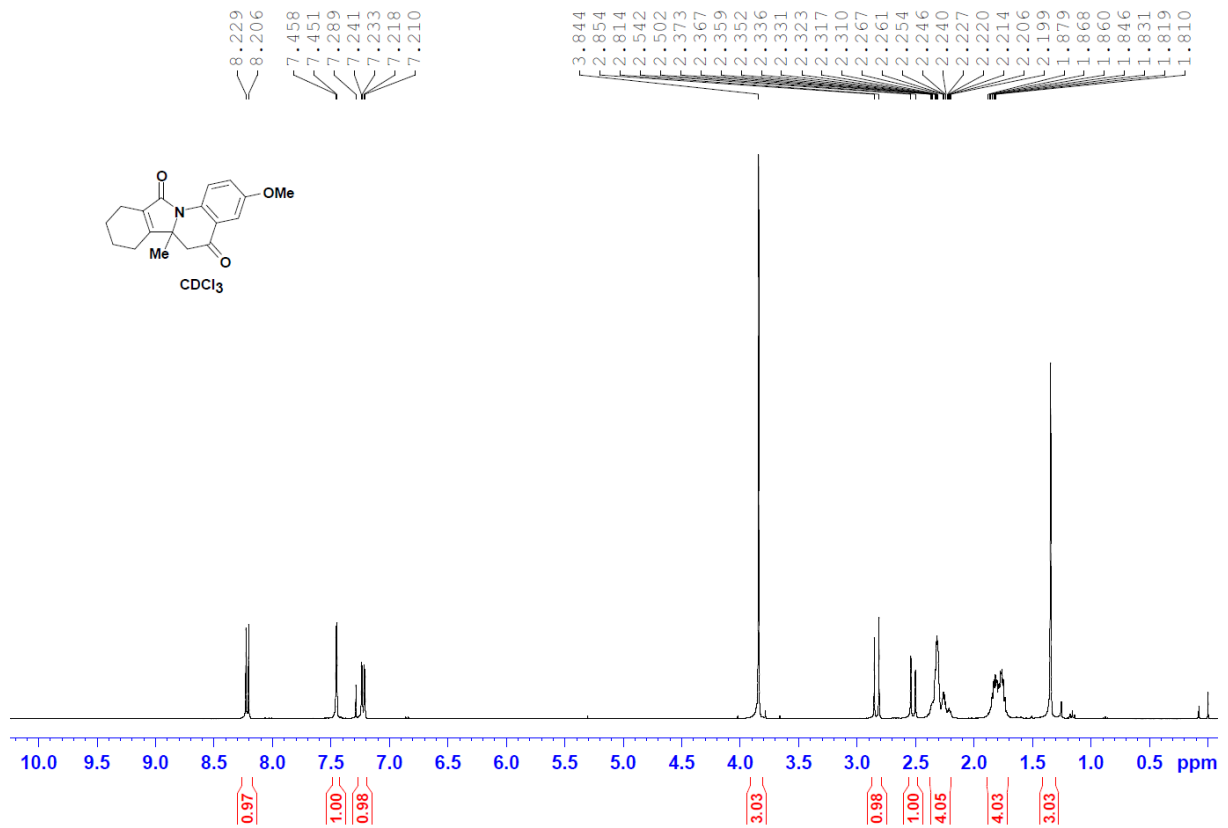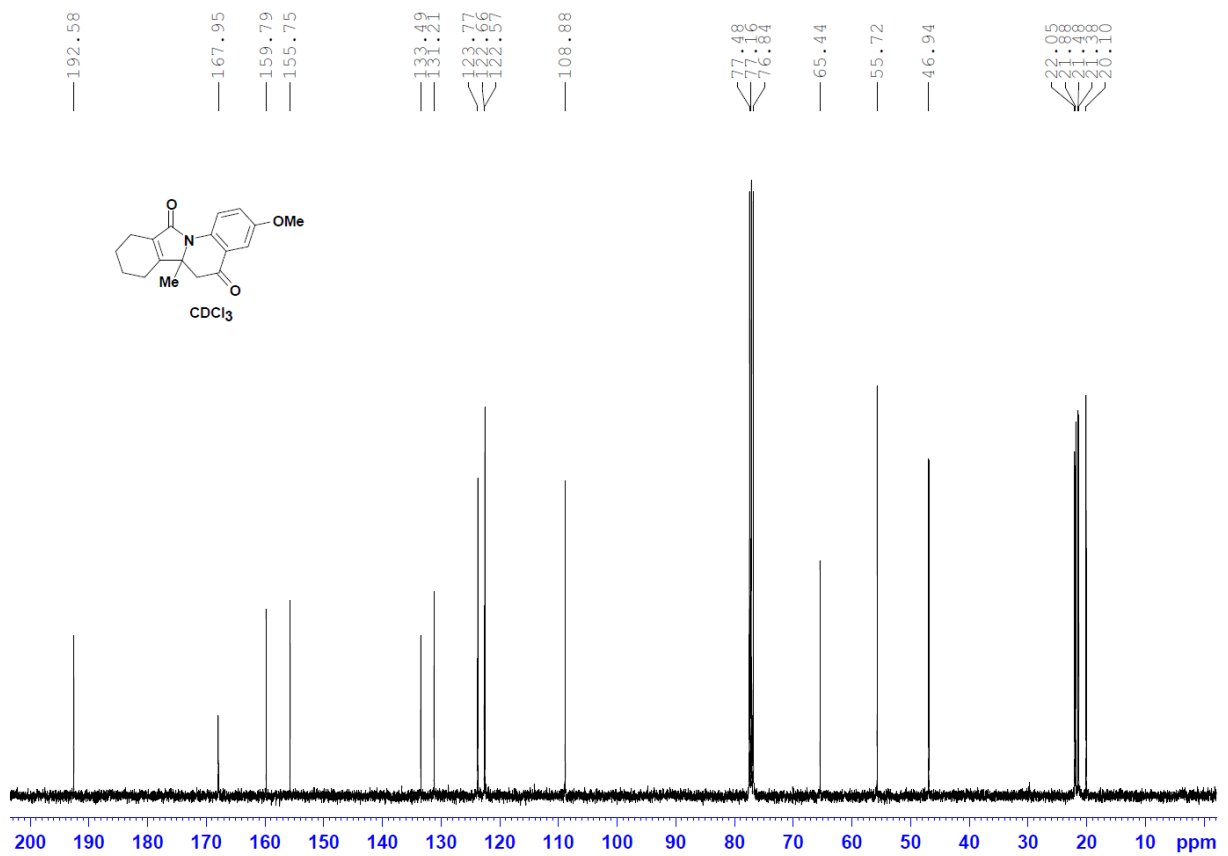

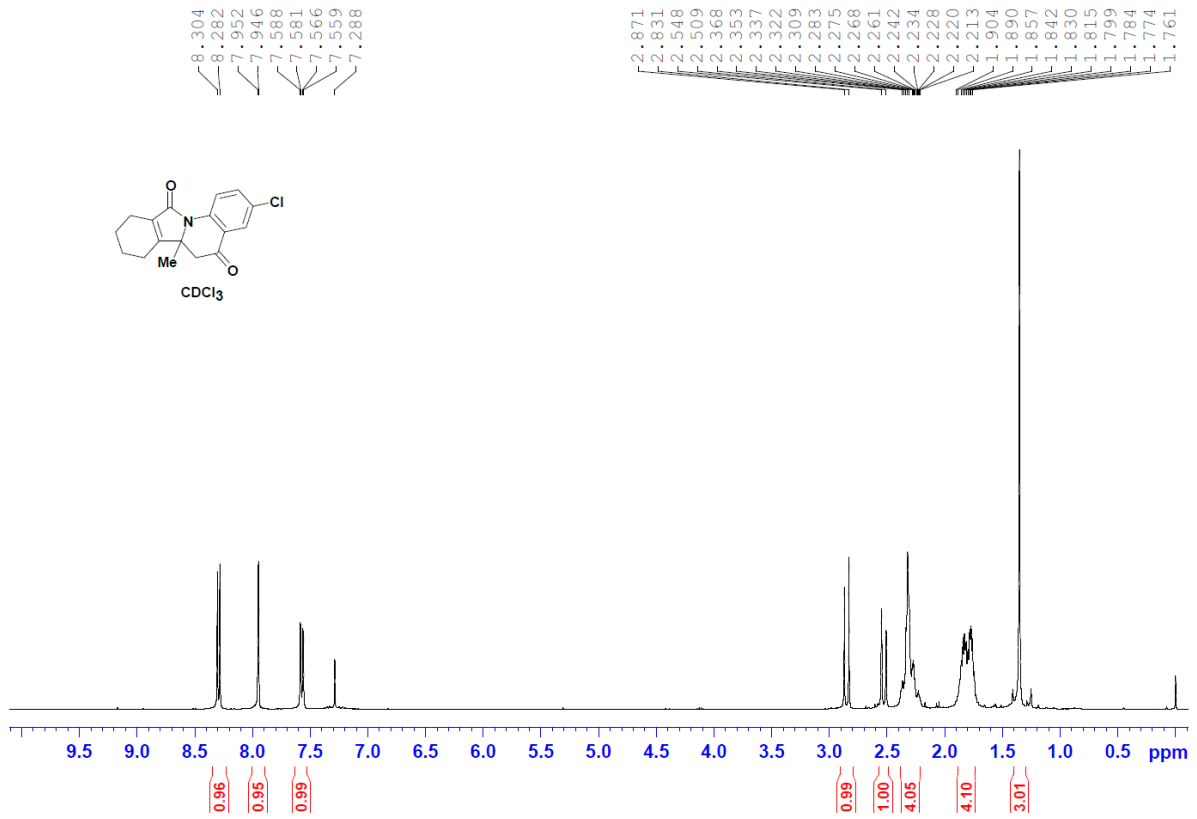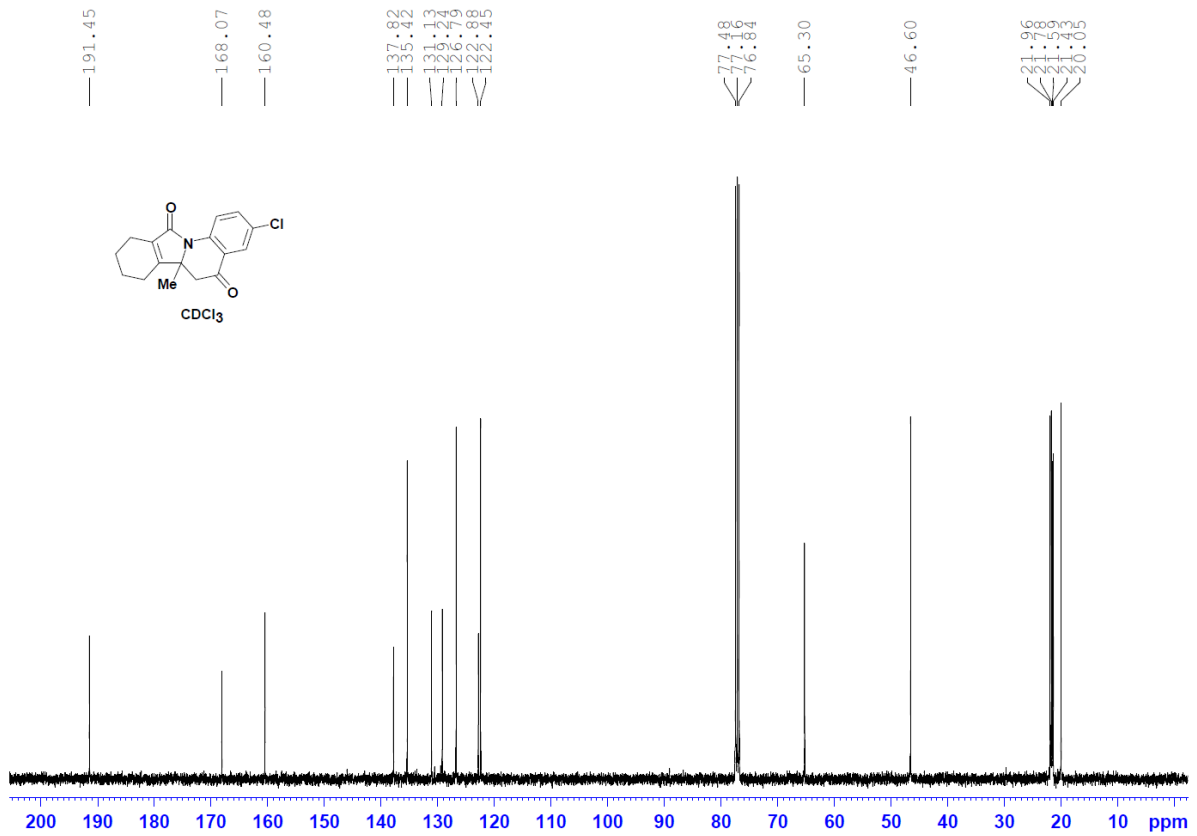

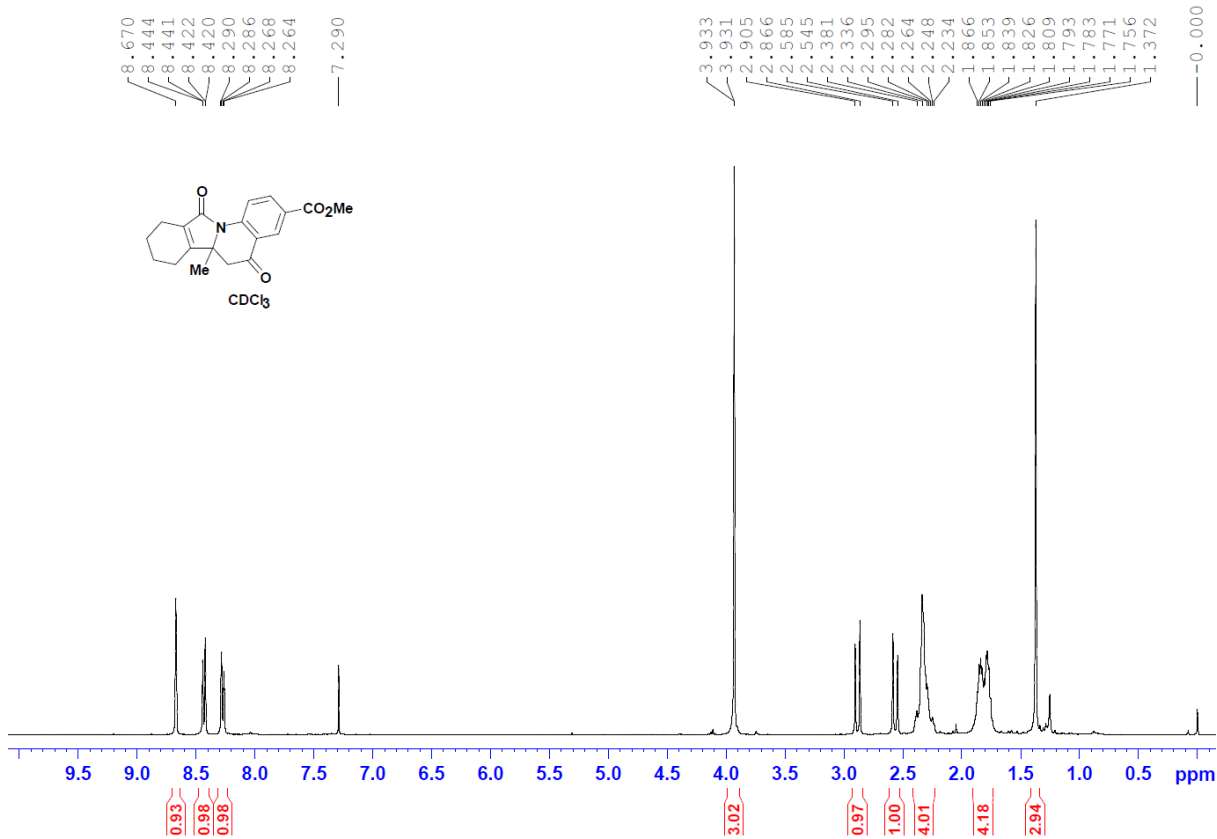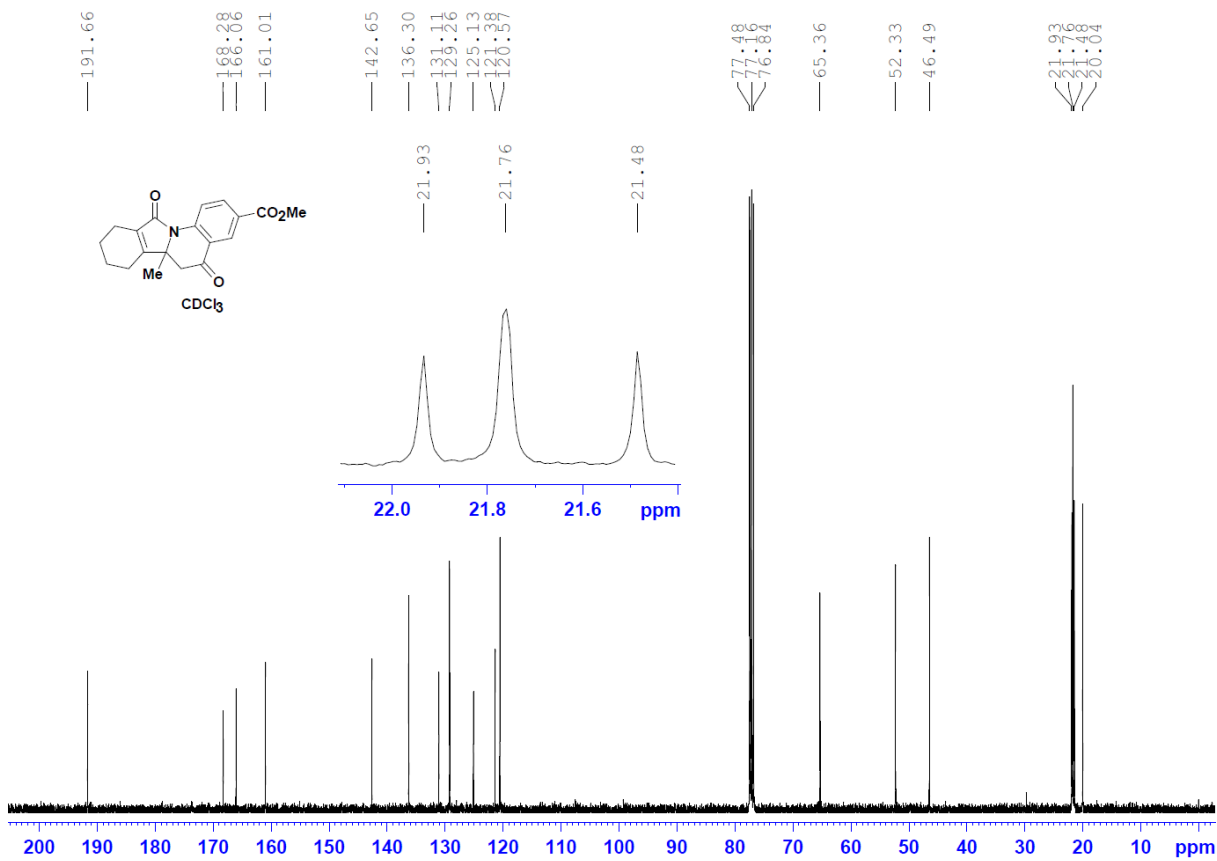

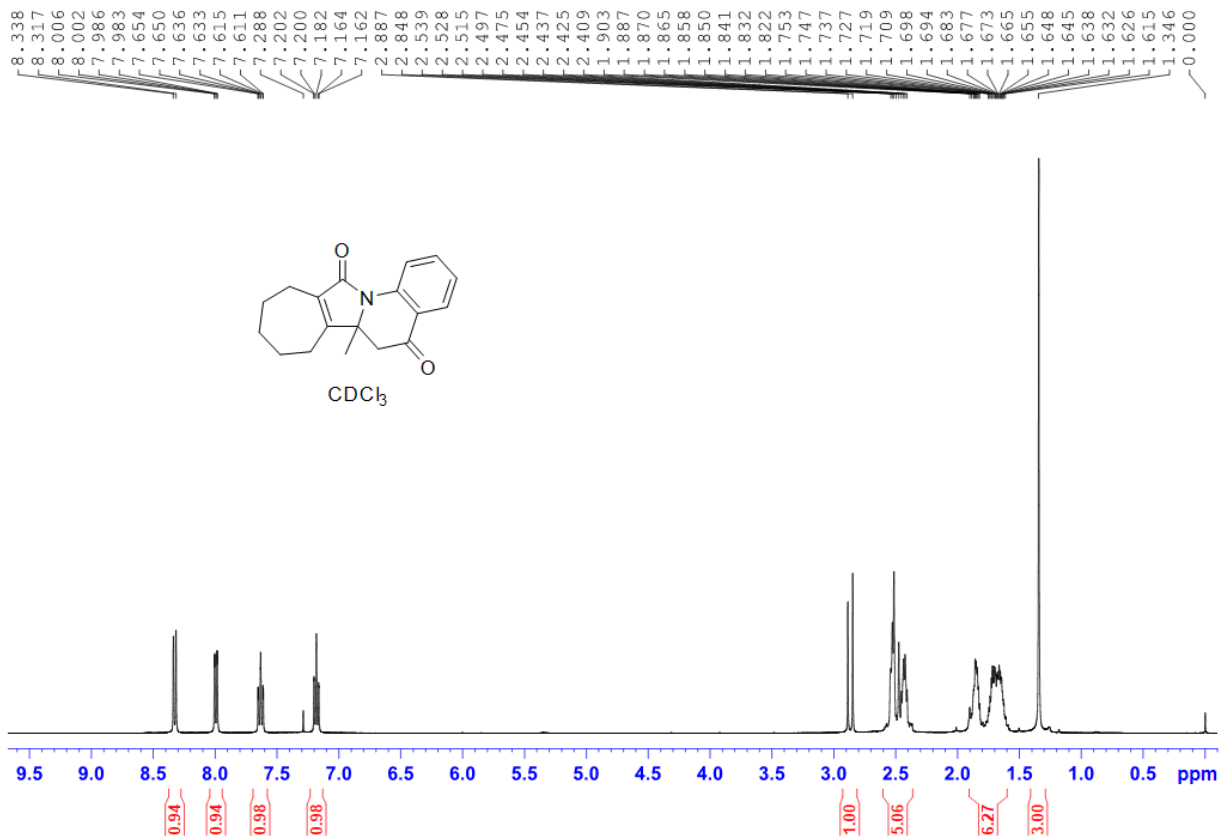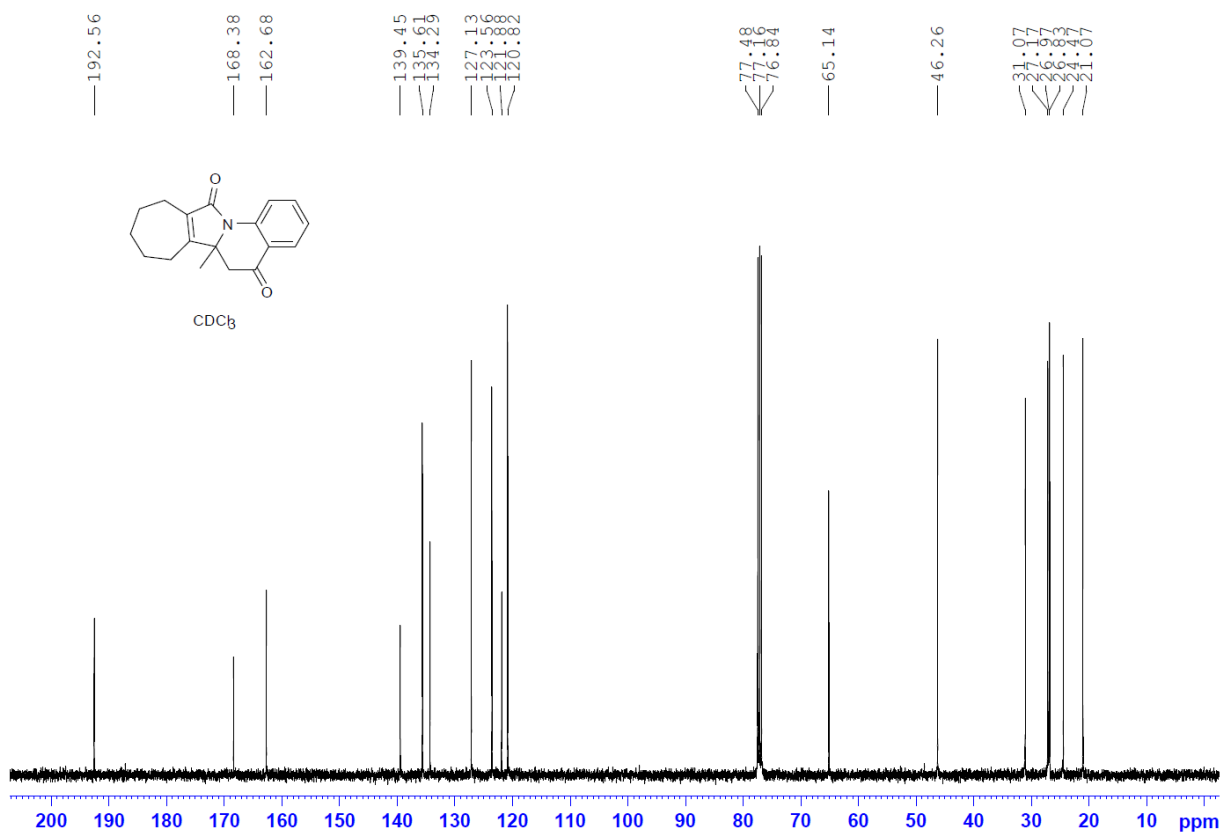



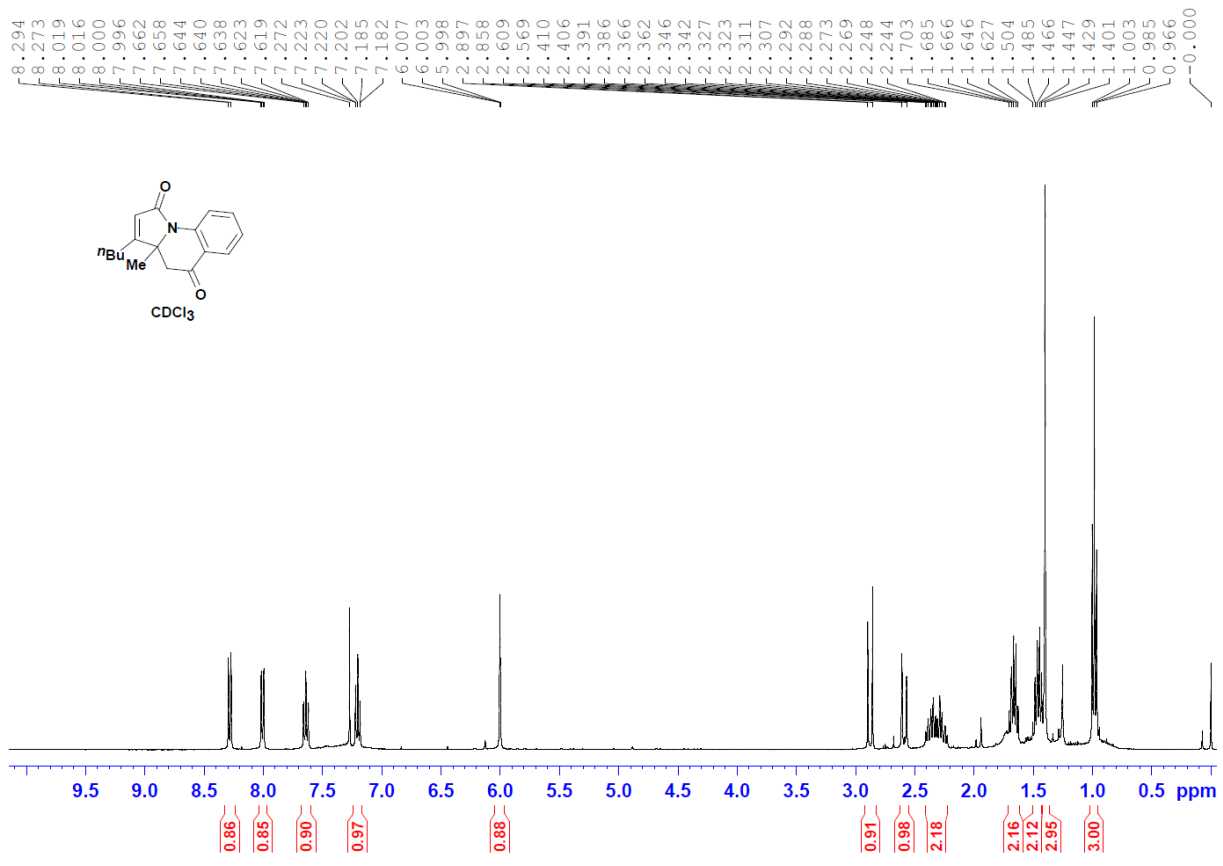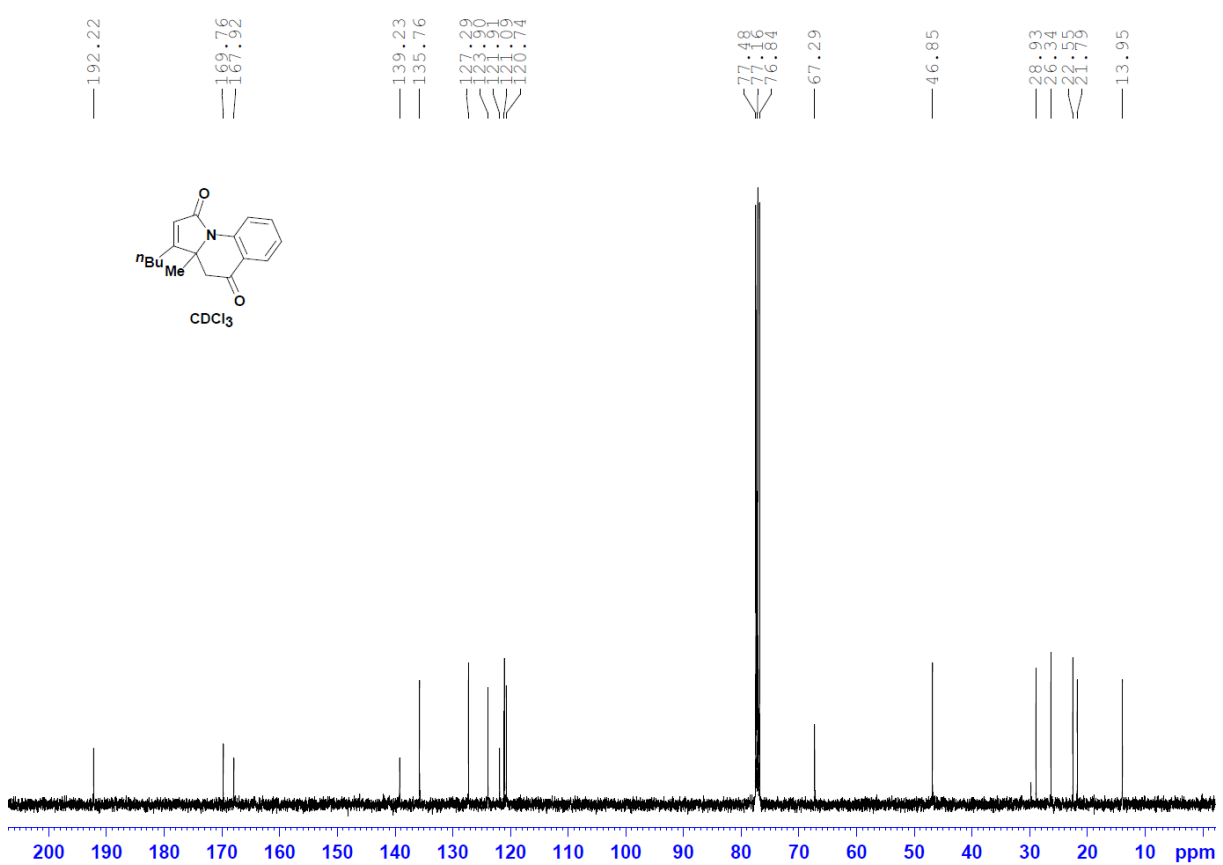

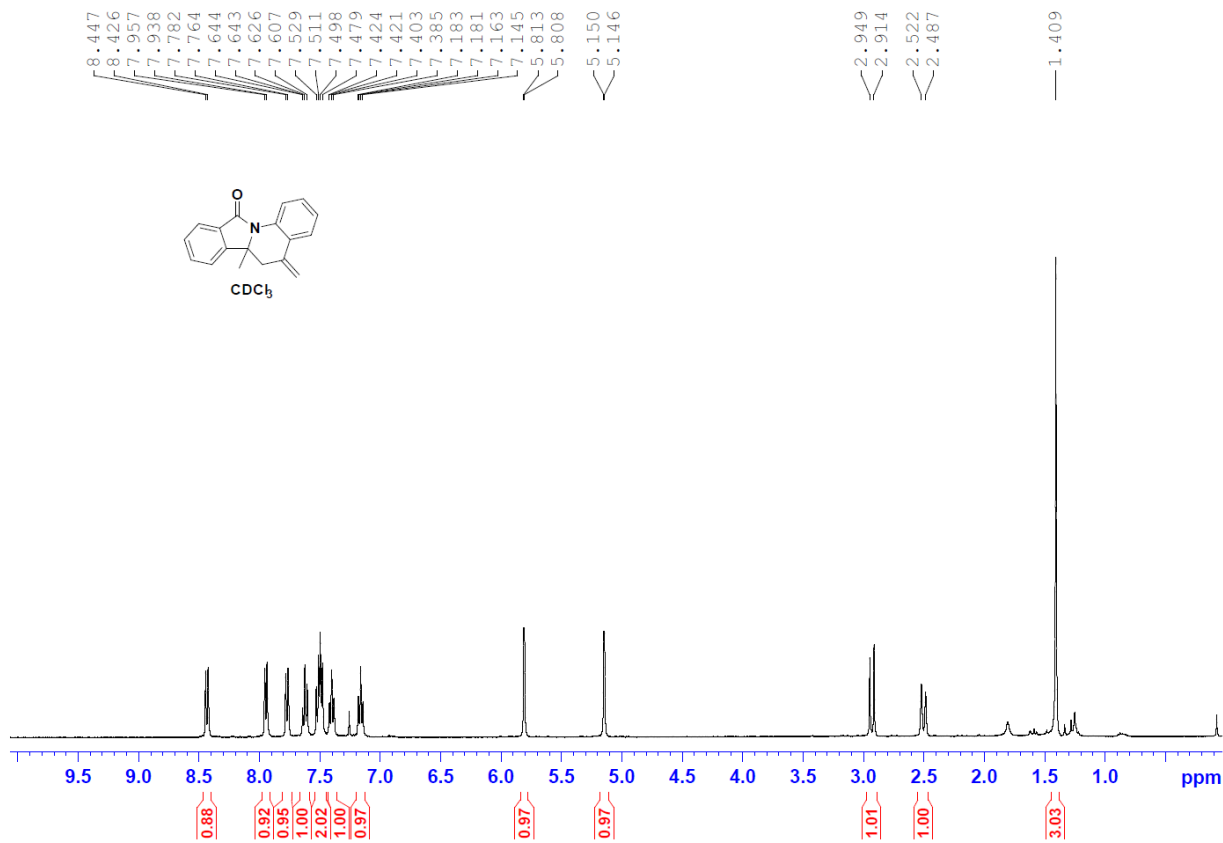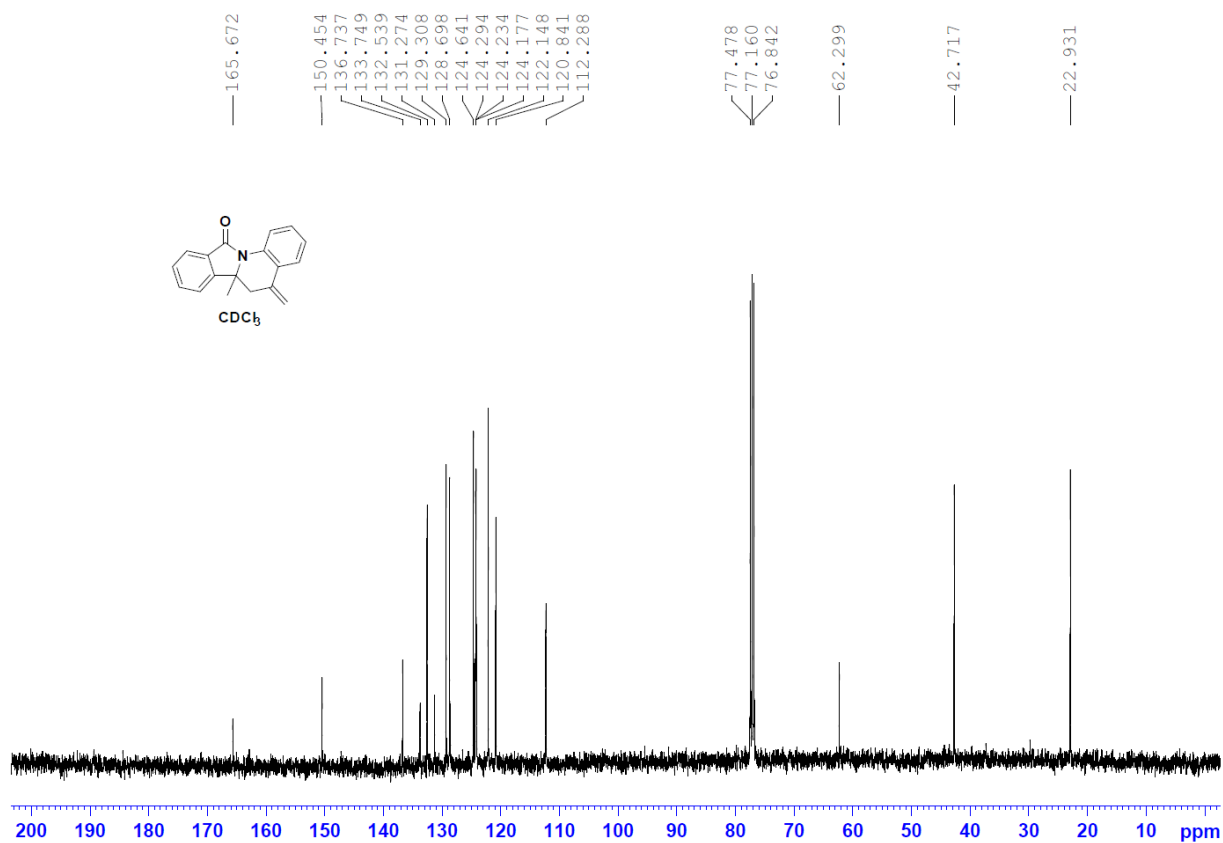

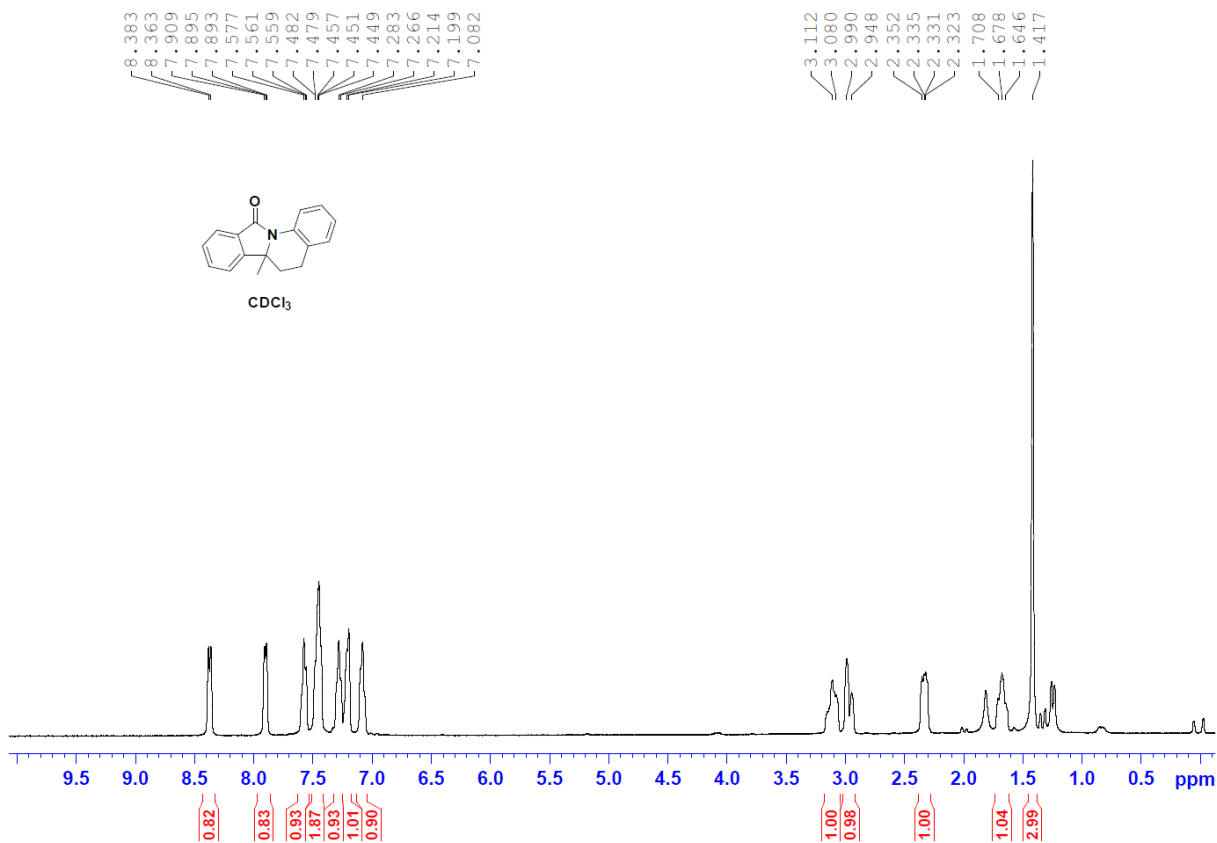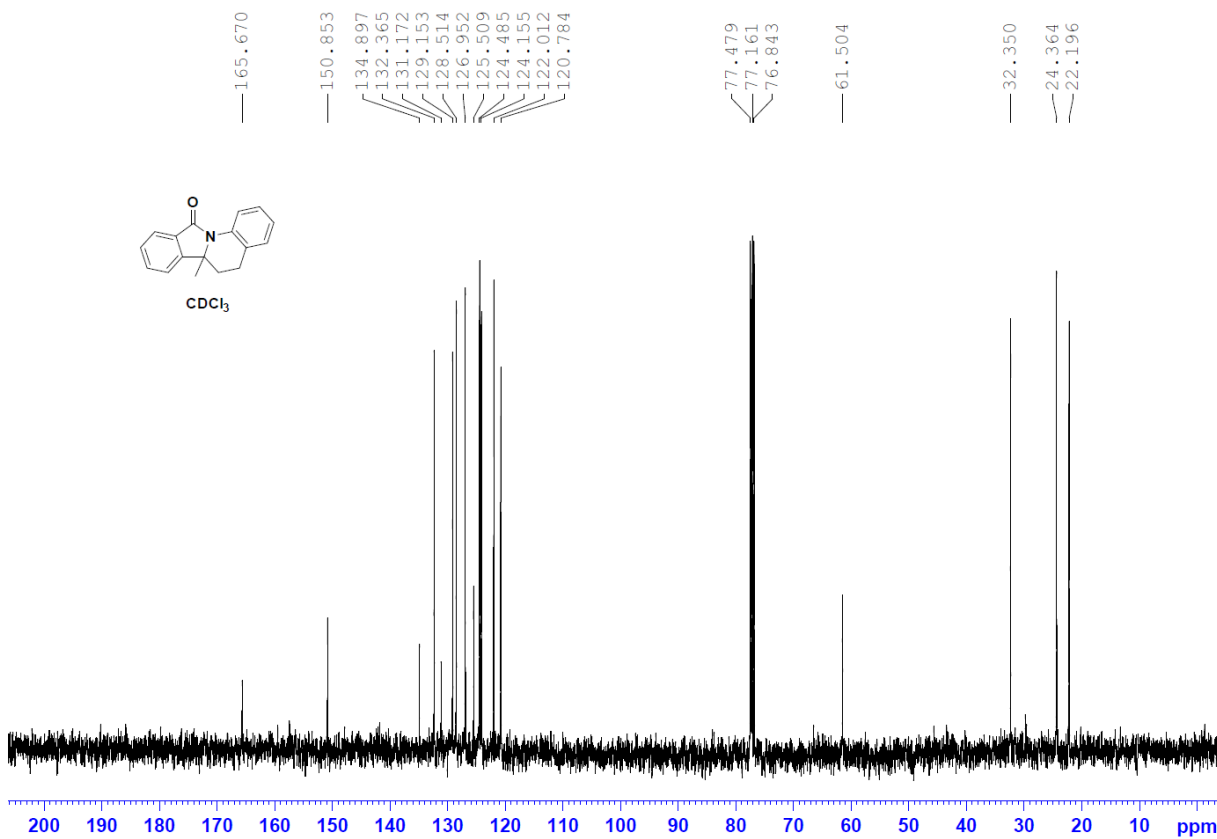

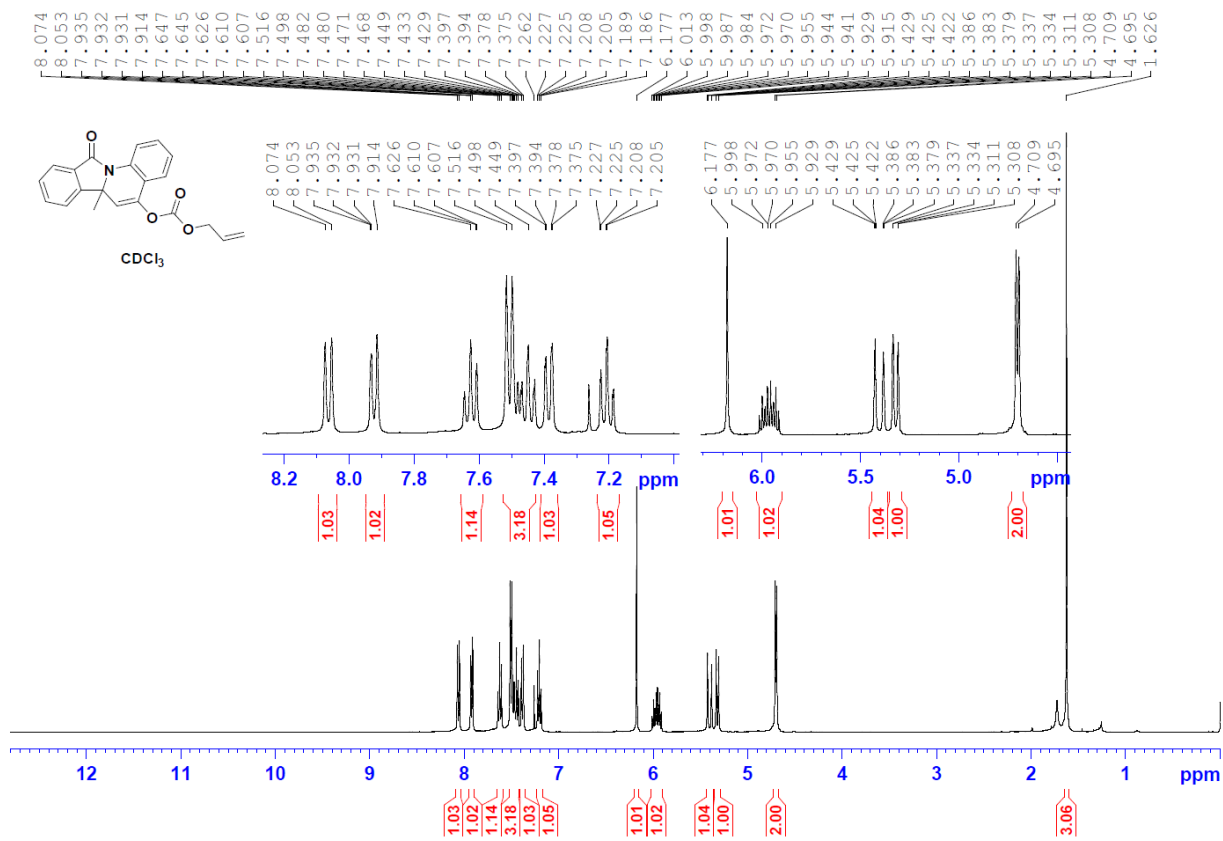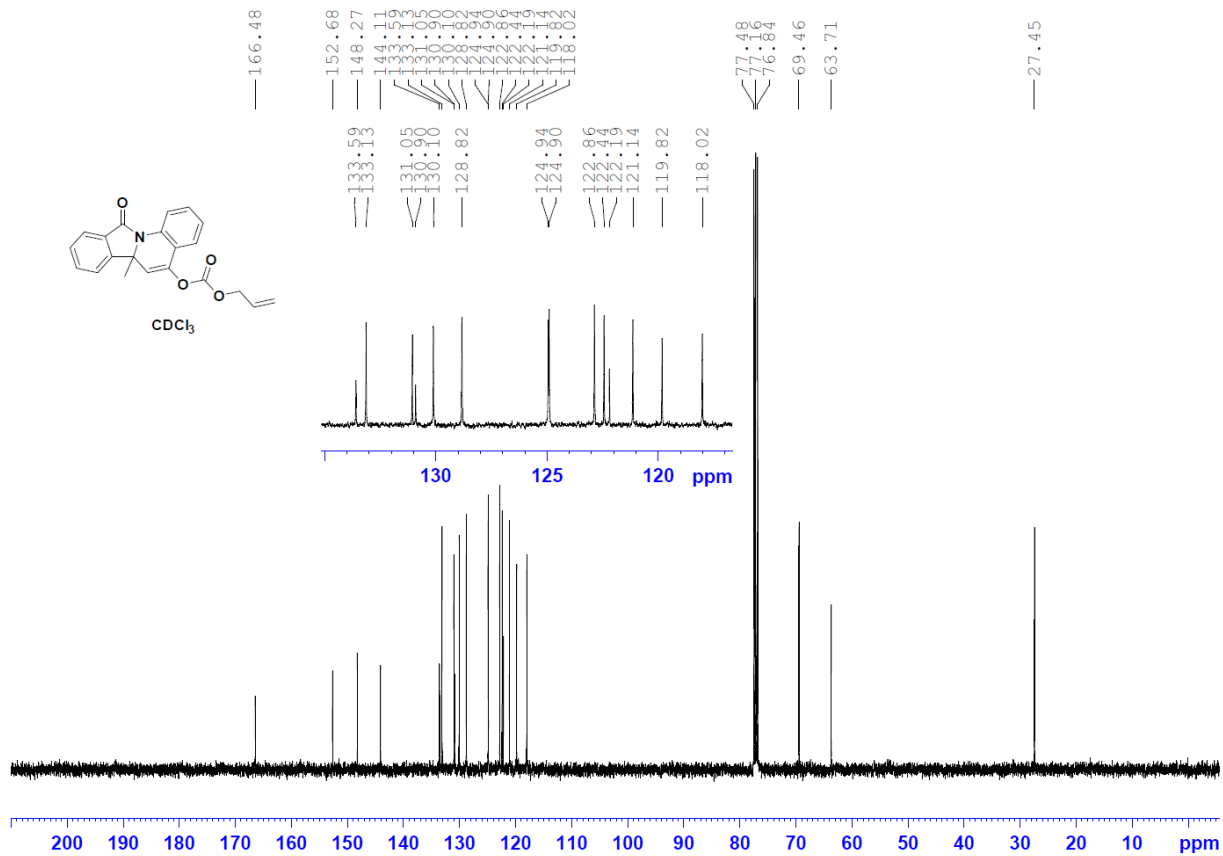

Supplement: d2qo01777f1.pdf [file d2qo01777f1.pdf]
